# Supplementary material for: Pd-Catalyzed cascade Heck cyclization/carbonylation of indoles with aryl formates: enantioselective construction of indolo[2,1-a]isoquinolines
Source: Royal Society of Chemistry journal article supplement (doi:10.1039/d4cc02577f), 2024-01-01

## Supporting Information

# Pd-Catalyzed Cascade Heck Cyclization/Carbonylation of Indoles with Aryl Formates: Enantioselective Construction of Indolo[2,1-a]isoquinolines

Dongmei Chi, Hongbo Qi, Leming Wang\* and Shufeng Chen\*

Inner Mongolia Key Laboratory of Fine Organic Synthesis, Department of Chemistry and Chemical Engineering, Inner Mongolia University, Hohhot 010021, China

E-mail: shufengchen@imu.edu.cn; wanglm@imu.edu.cn

## Contents

|                                                                                                      |    |
|------------------------------------------------------------------------------------------------------|----|
| 1. General Information .....                                                                         | 2  |
| 2. Materials .....                                                                                   | 2  |
| 3. Deoptimization Table .....                                                                        | 3  |
| 4. Preparation of Substrates <b>1</b> .....                                                          | 5  |
| 5. Preparation of Substrates <b>2</b> .....                                                          | 6  |
| 6. A Typical Procedure for the Synthesis of Products <b>3</b> and Asymmetric Products <b>3</b> ..... | 6  |
| 7. Scale-Up Reaction and Derivatizations .....                                                       | 7  |
| 8. Characterization of the Products .....                                                            | 8  |
| 9. X-Ray Analysis Data of Single Crystal <b>3aa</b> (CCDC 2295989) .....                             | 19 |
| 10. References .....                                                                                 | 20 |
| 11. Chiral HPLC Charts and NMR Spectra .....                                                         | 21 |

## 1. General Information

All anaerobic and moisture-sensitive manipulations were carried out with standard Schlenk techniques under argon. NMR spectra were recorded on a Bruker AV 600MHz NMR. Chemical shifts are reported in  $\delta$  (ppm) referenced to the residual peaks of  $\text{CHCl}_3$  ( $\delta$  7.26) for  $^1\text{H}$  NMR,  $\text{CHCl}_3$  ( $\delta$  77.00) for  $^{13}\text{C}$  NMR. The following abbreviations are used to describe the multiplicities; s: singlet, d: doublet, t: triplet, q: quartet, quint: quintet, sext: sextet, hept: heptet, m: multiplet. Coupling constants are reported in Hertz (Hz). IR spectra were recorded on a FT-IR instrument. The HRMS analysis was obtained on a QTOF mass spectrometer. X-ray diffraction data were collected at 150 K on a Rigaku Oxford Diffraction Supernova Dual Source, Cu at Zero equipped with an AtlasS2 CCD using  $\text{Cu K}\alpha$  radiation. For thin layer chromatography (TLC), NUO TAI precoated TLC plates (SHF254) were used, and compounds were visualized with a UV light at 254 nm. Flash column chromatography was performed with Silica gel (SANPONT). Enantiomeric excesses (ee) were determined by HPLC analysis on Shimazu (LC-2050) HPLC with Daicel chiral columns. Melting points were determined with melting points apparatus and are uncorrected.

## 2. Materials

All commercially available reagents were used directly without purification unless otherwise stated. All solvents were purified following standard procedures. Substrates **1**<sup>1-2</sup>, **2b-2l**, **2n** and **2o**<sup>2-4</sup> were synthesized in the lab by the reported procedures. **2a** and **2m** were purchased from commercial sources and used directly without further purification unless otherwise stated.

### 3. Deoptimization Table

**Table S1. Optimization of the Reaction Conditions<sup>a</sup>**

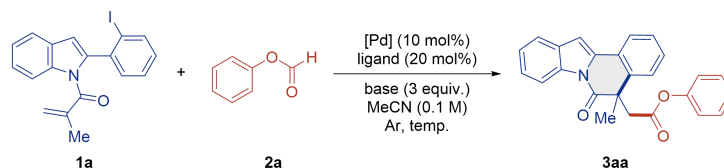

| Entry | Catalyst                              | Ligand                            | Base                            | Solvent | Yield <sup>b</sup> (%) |
|-------|---------------------------------------|-----------------------------------|---------------------------------|---------|------------------------|
| 1     | Pd(OAc) <sub>2</sub>                  | PPh <sub>3</sub>                  | K <sub>2</sub> CO <sub>3</sub>  | MeCN    | 64                     |
| 2     | Pd(OAc) <sub>2</sub>                  | PPh <sub>3</sub>                  | K <sub>2</sub> CO <sub>3</sub>  | DCE     | 0                      |
| 3     | Pd(OAc) <sub>2</sub>                  | PPh <sub>3</sub>                  | K <sub>2</sub> CO <sub>3</sub>  | Toluene | 0                      |
| 4     | Pd(TFA) <sub>2</sub>                  | PPh <sub>3</sub>                  | K <sub>2</sub> CO <sub>3</sub>  | MeCN    | 82                     |
| 5     | Pd <sub>2</sub> (dba) <sub>3</sub>    | PPh <sub>3</sub>                  | K <sub>2</sub> CO <sub>3</sub>  | MeCN    | 73                     |
| 6     | Pd(PhCN) <sub>2</sub> Cl <sub>2</sub> | PPh <sub>3</sub>                  | K <sub>2</sub> CO <sub>3</sub>  | MeCN    | 74                     |
| 7     | Pd(TFA) <sub>2</sub>                  | P( <i>p</i> -tolyl) <sub>3</sub>  | K <sub>2</sub> CO <sub>3</sub>  | MeCN    | 87                     |
| 8     | Pd(TFA) <sub>2</sub>                  | P( <i>p</i> -anisyl) <sub>3</sub> | K <sub>2</sub> CO <sub>3</sub>  | MeCN    | 76                     |
| 9     | Pd(TFA) <sub>2</sub>                  | PCy <sub>3</sub>                  | K <sub>2</sub> CO <sub>3</sub>  | MeCN    | 34                     |
| 10    | Pd(TFA) <sub>2</sub>                  | BINAP                             | K <sub>2</sub> CO <sub>3</sub>  | MeCN    | 73                     |
| 11    | Pd(TFA) <sub>2</sub>                  | P( <i>p</i> -tolyl) <sub>3</sub>  | Na <sub>2</sub> CO <sub>3</sub> | MeCN    | 27                     |
| 12    | Pd(TFA) <sub>2</sub>                  | P( <i>p</i> -tolyl) <sub>3</sub>  | Cs <sub>2</sub> CO <sub>3</sub> | MeCN    | 27                     |
| 13    | Pd(TFA) <sub>2</sub>                  | P( <i>p</i> -tolyl) <sub>3</sub>  | <i>t</i> -BuOK                  | MeCN    | 0                      |
| 14    | Pd(TFA) <sub>2</sub>                  | P( <i>p</i> -tolyl) <sub>3</sub>  | K <sub>3</sub> PO <sub>4</sub>  | MeCN    | 76                     |
| 15    | Pd(TFA) <sub>2</sub>                  | P( <i>p</i> -tolyl) <sub>3</sub>  | K <sub>2</sub> CO <sub>3</sub>  | MeCN    | 94 <sup>c</sup>        |
| 16    | Pd(TFA) <sub>2</sub>                  | P( <i>p</i> -tolyl) <sub>3</sub>  | K <sub>2</sub> CO <sub>3</sub>  | MeCN    | 94 <sup>c,d</sup>      |
| 17    | Pd(TFA) <sub>2</sub>                  | P( <i>p</i> -tolyl) <sub>3</sub>  | K <sub>2</sub> CO <sub>3</sub>  | MeCN    | 97 <sup>c,d,e</sup>    |

<sup>a</sup>Reaction conditions unless otherwise noted: **1a** (0.1 mmol), **2a** (0.2 mmol), catalyst (10.0 mol %), ligand (20.0 mol %), MeCN (1 mL, 0.1 M), base (0.3 mmol), 80 °C, 20 h under an argon atmosphere. <sup>b</sup>Isolated yields. <sup>c</sup>70°C. <sup>d</sup>**2a** (0.15 mmol). <sup>e</sup> K<sub>2</sub>CO<sub>3</sub> (0.2 mmol).

**Table S2. Screening of the chiral ligands under optimal racemic reaction conditions.<sup>a</sup>**

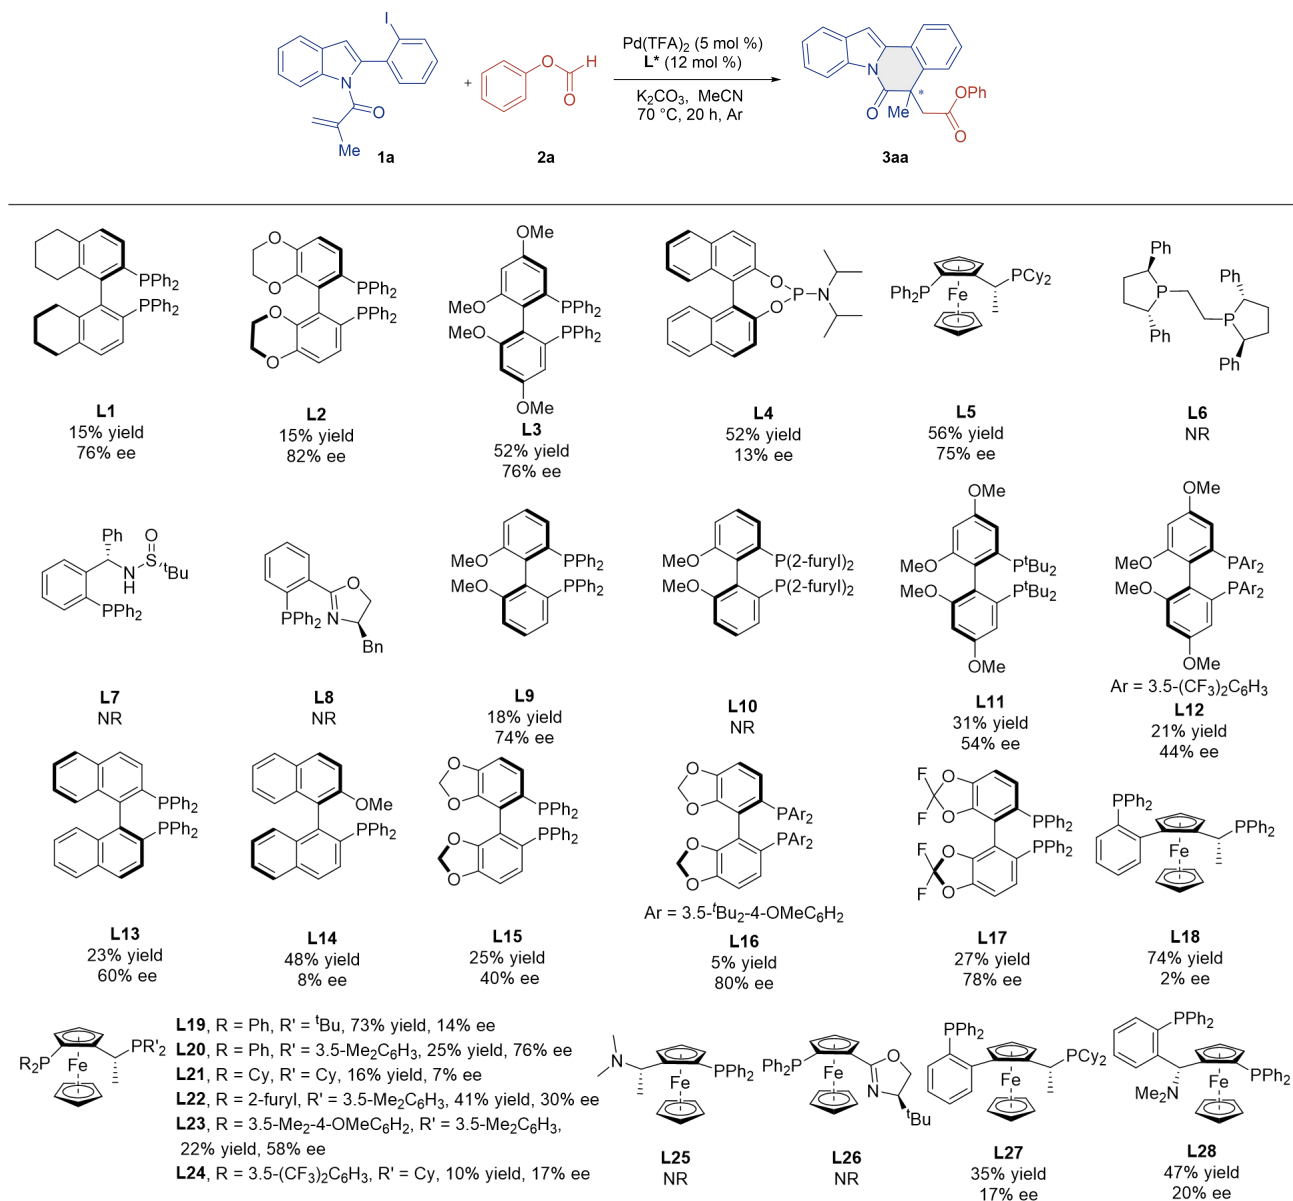

<sup>a</sup>Reaction conditions unless otherwise noted: **1a** (0.1 mmol), **2a** (0.15 mmol), Pd(TFA)<sub>2</sub> (5.0 mol %), ligand (12.0 mol %), MeCN (1.0 mL, 0.1 M), K<sub>2</sub>CO<sub>3</sub> (0.2 mmol), 70 °C, 20 h under an argon atmosphere. Isolated yields. Determined by HPLC analysis.

## 4. Preparation of Substrates 1

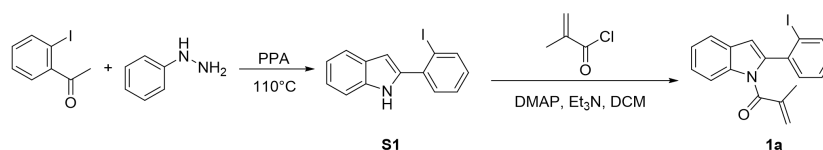

**Scheme S1**

**Step I:** A mixture of 2-iodoacetophenone (10.0 mmol, 2.5 g, 1.0 equiv.), phenylhydrazine (12.0 mmol, 1.3 g, 1.2 equiv.) and polyphosphoric acid (PPA, 30.0 g) was added to a round bottom flask and stirred at 110°C in an oil bath for 6 h. After the completion of the reaction, the residue was quenched with ice water and extracted with ethyl acetate. The organic phases were dried over anhydrous Na<sub>2</sub>SO<sub>4</sub> and concentrated under reduced pressure. The crude product was purified by silica gel column chromatography (petroleum ether/ethyl acetate = 10:1, v/v) to give the corresponding substituted indole **S1** as a yellow oil (65%, 2.3 g).

**Step II:** To the solution of indole **S1** (7.2 mmol, 1.0 equiv., 2.3 g) and DMAP (1.5 mmol, 0.2 equiv., 183 mg) in DCM (15.0 mL) was added Et<sub>3</sub>N (14.4 mmol, 2.0 equiv., 1.5 g) and methacryloyl chloride (8.7 mmol, 1.2 equiv., 910 mg) at 0 °C. The solution was warmed up to room temperature and stirred for overnight. The mixture was diluted with DCM and saturated Na<sub>2</sub>CO<sub>3</sub> solution. The organic and aqueous layers were separated. The aqueous layer was extracted with DCM. The combined organic layer was washed with brine, dried over Na<sub>2</sub>SO<sub>4</sub>, filtered and concentrated under reduced pressure to give a residue, which was purified by flash chromatography (petroleum ether/ethyl acetate = 10:1, v/v) and then recrystallized from *n*-hexane/EtOAc to afford the product **1a** as a yellow solid (46%, 1.3g) (Scheme S1). Procedure for the synthesis of substrates **1b-1e, 1j** is similar to **1a**.

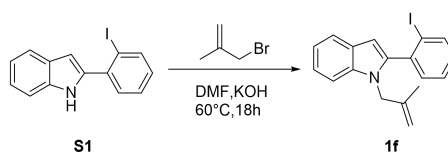

**Scheme S2**

A solution of **S1** (6.0 mmol, 1.91 g, 1.0 equiv.) in 10.0 mL of DMF and powdered KOH (7.8 mmol, 437 mg, 1.3 equiv.) was stirred at 60 °C in an oil bath for 10 min, cooled to room temperature, and treated with 3-bromo-2-methylprop-1-ene (8.9 mmol, 1.20 g, 1.5 equiv.). The reaction mixture was stirred at 60 °C in an oil bath for 18 h, and then poured onto ice and diluted with 15 mL of EtOAc. The combined organic layers were washed with H<sub>2</sub>O, brine, dried over Na<sub>2</sub>SO<sub>4</sub>, concentrated under reduced pressure and purified by chromatography (petroleum ether/ethyl acetate = 20:1, v/v) to afford the desired product **1g** as a yellow oil (60%, 1.3 g) (Scheme S2). Procedure for the synthesis of substrates

**1g-1i** is similar to **1f**.

## 5. Preparation of Substrates 2

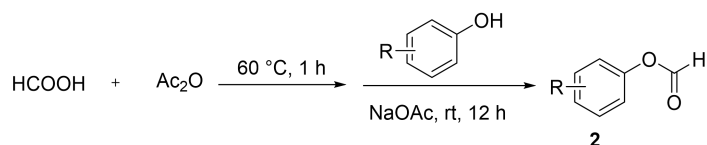

**Scheme S3**

Formic acid (23 mL, 600 mmol, 6.0 equiv.) was added to acetic anhydride (38 mL, 400 mmol, 4.0 equiv.) at rt. The mixture was stirred at 60 °C (oil bath) for 1 h and cooled to rt. The resulting solution was poured to the flask containing phenol (9.4 g, 100 mmol) and NaOAc (8.2 g, 100 mmol, 1.0 equiv.). The mixture was stirred at room temperature for 12 h. Then, CH<sub>2</sub>Cl<sub>2</sub> and water was added to the mixture and the organic layer was extracted with CH<sub>2</sub>Cl<sub>2</sub> (three times), washed with saturated NaHCO<sub>3</sub> solution (three times) and brine (one time), and dried over anhydrous Na<sub>2</sub>SO<sub>4</sub>. After filtration, the filtrate was concentrated under reduced pressure. Then the filtrate was concentrated under reduced pressure and the residue was purified by column chromatography (petroleum ether/ethyl acetate = 20:1, v/v) on silica gel to provide the desired products **2b-g**, **2i-2l**, **2n**, and **2o** (Scheme S3)<sup>3</sup>.

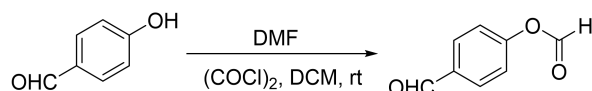

**Scheme S4**

To a solution of phenolic substrate (5 mmol) in DCM, oxalyl chloride (15 mmol) was added at 0 °C and after that DMF (7.5 mmol) was added in a dropwise manner. The reaction was allowed to reach room temperature slowly and stirring for 6 h. A saturated solution of sodium bicarbonate (15 mL) was added to the reaction mixture to quench of excess oxalyl chloride. The reaction mixture was extracted with ethyl acetate (3x10 mL), dried over anhydrous Na<sub>2</sub>SO<sub>4</sub>, and evaporated to dryness under vacuum. The crude product was purified by column chromatography over silica gel (petroleum ether/ethyl acetate = 10:1, v/v) to give the products **2h** as colorless oil (70%, 0.53 g) (Scheme S4)<sup>4</sup>.

## 6. A Typical Procedure for the Synthesis of Products 3 and Asymmetric Products 3

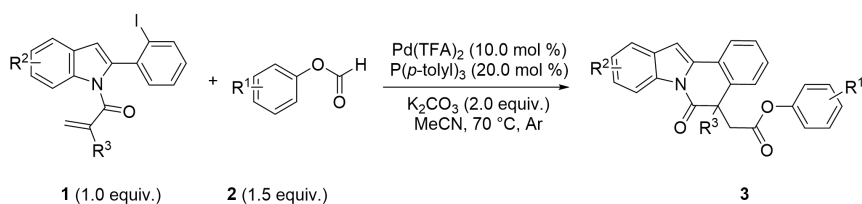

**Scheme S5**

Compounds **1** (0.1 mmol, 1.0 equiv.), compounds **2** (0.15 mmol, 1.5 equiv.), Pd(TFA)<sub>2</sub> (3.3 mg,

10.0 mol %), P(*p*-tolyl)<sub>3</sub> (6.1 mg, 20.0 mol %) and K<sub>2</sub>CO<sub>3</sub> (27.6 mg, 0.2 mmol, 2.0 equiv.) were added to a reaction tube successively under an argon atmosphere, and then MeCN (1.0 mL) was added via syringe. The resulting mixture was stirred at 70°C in an oil bath for 20 h. After cooling at room temperature, the mixture was concentrated under reduced pressure. The residue was purified on a silica gel column (petroleum ether/ethyl acetate = 15: 1, v/v) to afford the products **3** (Scheme S5).

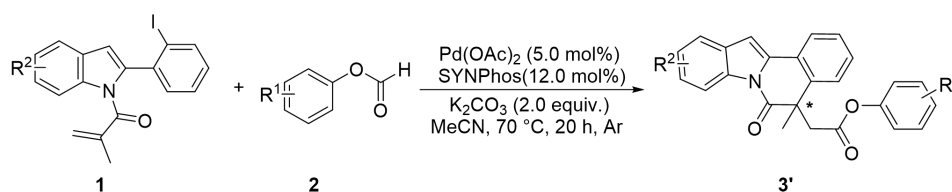

**Scheme S6**

Compounds **1** (0.1 mmol, 1.0 equiv.), compounds **2** (0.20 mmol, 2.0 equiv.), Pd(OAc)<sub>2</sub> (1.2 mg, 5.0 mol %), SYNPhos (7.7 mg, 12.0 mol %) and K<sub>2</sub>CO<sub>3</sub> (27.6 mg, 0.2 mmol, 2.0 equiv.) were added to a reaction tube successively under an argon atmosphere, and then MeCN (1.0 mL) was added via syringe. The resulting mixture was stirred at 70°C in an oil bath for 20 h. After cooling at room temperature, the mixture was concentrated under reduced pressure. The residue was purified on a silica gel column (petroleum ether/ethyl acetate = 15: 1, v/v) to afford the asymmetric products **3** (Scheme S6).

## 7. Scale-Up Reaction and Derivatizations

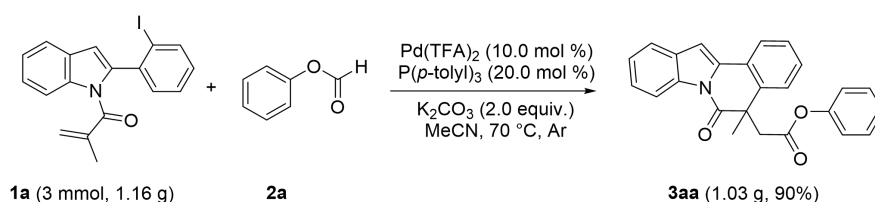

**Scheme S7**

**Scale-up reaction:** Compound **1a** (3.0 mmol, 1.16 g, 1.0 equiv.), **2a** (4.5 mmol, 550 mg, 1.5 equiv.), Pd(TFA)<sub>2</sub> (0.3 mmol, 100 mg), P(*p*-tolyl)<sub>3</sub> (0.6 mmol, 182 mg) and K<sub>2</sub>CO<sub>3</sub> (6.0 mmol, 828 mg, 2.0 equiv.) were added to a sealed tube, and MeCN (30.0 mL) was added via syringe under an argon atmosphere. The reaction mixture was stirred at 70°C until completion (monitored by TLC). After cooling at room temperature, the mixture was concentrated under reduced pressure. The residue was purified on a silica gel column (petroleum ether/ethyl acetate = 20: 1, v/v) to afford the product **3aa** (1.03 g, 90%) (Scheme S7).

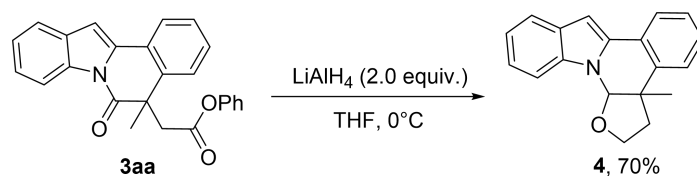

**Scheme S8**

LiAlH<sub>4</sub> (15.2 mg, 0.4 mmol, 2.0 equiv.) was added in a solution of product **3aa** (77 mg, 0.2 mmol, 1.0 equiv.) in THF (2.0 mL) at 0°C. After stirring at 0°C for 8 h, the mixture was quenched with 5.0 mL H<sub>2</sub>O and extracted with ethyl acetate. The combined organic extracts were dried over Na<sub>2</sub>SO<sub>4</sub> and evaporated under reduced pressure. The residue was purified by flash chromatography on silica gel (petroleum ether/ethyl acetate = 2: 1, v/v) to afford the corresponding product **4** (39 mg, 70%) (Scheme S8).

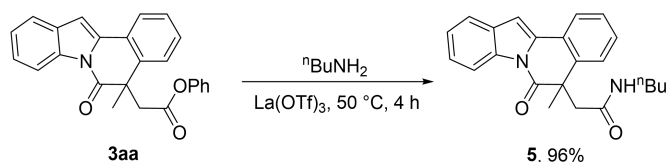

**Scheme S9**

To a solution of **3aa** (77 mg, 0.2 mmol, 1.0 equiv.) in 1 mL *n*BuNH<sub>2</sub> was added La(OTf)<sub>3</sub> (6 mg, 5.0 mol%). The reaction mixture was stirred at 50°C for 4 h. After cooling at room temperature, the mixture was extracted with ethyl acetate, dried with anhydrous sodium sulfate and concentrated under reduced pressure. The residue was purified through silica gel chromatography (petroleum ether/EtOAc = 10:1) to give amide **5** with 96% yield (Scheme S9).

## 8. Characterization of the Products

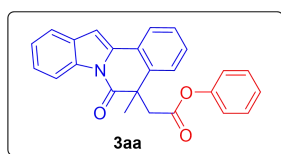

*Phenyl 2-(5-methyl-6-oxo-5,6-dihydroindolo[2,1-a]isoquinolin-5-yl)acetate* (**3aa**). Purification by column chromatography on silica gel (petroleum ether/ethyl acetate = 15:1, v/v) afforded the title compound as a yellow solid (37 mg, 97% yield). Mp: 70–75 °C. <sup>1</sup>H NMR (600 MHz, CDCl<sub>3</sub>) δ 8.59 (d, *J* = 8.2

Hz, 1H), 7.93 – 7.85 (m, 1H), 7.58 (d, *J* = 7.7 Hz, 1H), 7.48 – 7.28 (m, 5H), 7.21 - 7.14 (m, 2H), 7.10 – 7.01 (m, 2H), 6.66 (d, *J* = 8.0 Hz, 2H), 4.02 (d, *J* = 17.0 Hz, 1H), 3.36 (d, *J* = 17.0 Hz, 1H), 1.71 (s, 3H). <sup>13</sup>C NMR (151 MHz, CDCl<sub>3</sub>) δ 172.2, 168.8, 150.1, 137.4, 135.4, 135.3, 130.6, 129.1, 128.9, 127.5, 125.7, 125.2, 125.2, 124.7, 124.4, 124.1, 121.1, 120.4, 116.6, 103.3, 46.4, 44.3, 30.3. IR: 1756, 1696, 1596, 1449, 1379, 1343, 1268, 1161, 1084, 932, 813, 755 cm<sup>-1</sup>. HRMS (ESI) *m/z*: Calcd for C<sub>25</sub>H<sub>19</sub>NO<sub>3</sub>Na [M + Na]<sup>+</sup>, 404.1257; Found, 404.1255



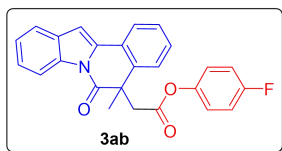

**4-Fluorophenyl 2-(5-methyl-6-oxo-5,6-dihydroindolo[2,1-a]isoquinolin-5-yl)acetate (3ab).** Purification by column chromatography on silica gel (petroleum ether/ethyl acetate = 20:1, v/v) afforded the title compound as a yellow solid (40 mg, 88% yield). Mp: 91–94 °C. <sup>1</sup>H NMR (600 MHz, CDCl<sub>3</sub>) δ 8.59 (d, *J* = 8.2 Hz, 1H), 7.91 – 7.88 (m, 1H), 7.59 (d, *J* = 7.7 Hz, 1H), 7.45 – 7.36 (m, 4H), 7.33 – 7.30 (m, 1H), 7.05 (s, 1H), 6.87 – 6.83 (m, 2H), 6.64 – 6.59 (m, 2H), 4.01 (d, *J* = 17.0 Hz, 1H), 3.35 (d, *J* = 16.9 Hz, 1H), 1.71 (s, 3H). <sup>13</sup>C NMR (151 MHz, CDCl<sub>3</sub>) δ 172.2, 168.9, 160.0 (d, *J*<sub>C-F</sub> = 244.2 Hz), 145.9 (d, *J*<sub>C-F</sub> = 3.0 Hz), 137.3, 135.4, 135.2, 130.6, 128.9, 127.6, 125.3, 124.7, 124.6, 124.1, 122.5 (d, *J*<sub>C-F</sub> = 8.4 Hz), 120.5, 116.7, 115.8 (d, *J*<sub>C-F</sub> = 23.5 Hz), 103.4, 46.5, 44.2, 30.3. <sup>19</sup>F NMR (565 MHz, CDCl<sub>3</sub>) δ -116.91 (s, 1F). IR: 1756, 1698, 1600, 1504, 1450, 1383, 1342, 1185, 1091, 838, 752 cm<sup>-1</sup>. HRMS (ESI) *m/z*: calcd for C<sub>25</sub>H<sub>18</sub>FNO<sub>3</sub>Na [M + Na]<sup>+</sup>, 422.1163; found, 422.1148.

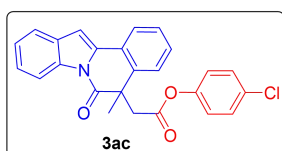

**4-Chlorophenyl 2-(5-methyl-6-oxo-5,6-dihydroindolo[2,1-a]isoquinolin-5-yl)acetate (3ac).** Purification by column chromatography on silica gel (petroleum ether/ethyl acetate = 15:1, v/v) afforded the title compound as a yellow solid (39 mg, 93% yield). Mp: 97–98 °C. <sup>1</sup>H NMR (600 MHz, CDCl<sub>3</sub>) δ 8.60 (d, *J* = 8.2 Hz, 1H), 7.92 – 7.86 (m, 1H), 7.60 (d, *J* = 7.7 Hz, 1H), 7.46 – 7.36 (m, 4H), 7.35 – 7.30 (m, 1H), 7.13 (d, *J* = 8.9 Hz, 2H), 7.06 (s, 1H), 6.60 (d, *J* = 8.9 Hz, 2H), 4.01 (d, *J* = 17.0 Hz, 1H), 3.35 (d, *J* = 17.0 Hz, 1H), 1.71 (s, 3H). <sup>13</sup>C NMR (151 MHz, CDCl<sub>3</sub>) δ 172.2, 168.7, 148.5, 137.2, 135.4, 135.2, 131.1, 130.6, 129.2, 128.9, 127.7, 125.3, 125.2, 124.7, 124.6, 124.1, 122.5, 120.5, 116.6, 103.5, 46.4, 44.3, 30.3. IR: 1756, 1697, 1600, 1486, 1448, 1380, 1343, 1197, 1164, 1085, 813, 758 cm<sup>-1</sup>. HRMS (ESI) *m/z*: calcd for C<sub>25</sub>H<sub>19</sub>ClNO<sub>3</sub> [M + H]<sup>+</sup>, 416.1048; found, 416.1022

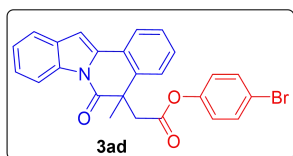

**4-Bromophenyl 2-(5-methyl-6-oxo-5,6-dihydroindolo[2,1-a]isoquinolin-5-yl)acetate (3ad).** Purification by column chromatography on silica gel (petroleum ether/ethyl acetate = 15:1, v/v) afforded the title compound as a yellow solid (32 mg, 67% yield). Mp: 79–81 °C. <sup>1</sup>H NMR (600 MHz, CDCl<sub>3</sub>) δ 8.57 (d, *J* = 7.4 Hz, 1H), 7.91 – 7.87 (m, 1H), 7.58 (d, *J* = 7.6 Hz, 1H), 7.44 – 7.26 (m, 7H), 7.05 (s, 1H), 6.57 – 6.50 (m, 2H), 4.00 (d, *J* = 17.0 Hz, 1H), 3.34 (d, *J* = 17.0 Hz, 1H), 1.70 (s, 3H). <sup>13</sup>C NMR (151 MHz, CDCl<sub>3</sub>) δ 172.1, 168.6, 149.1, 137.3, 135.4, 135.2, 132.2, 130.6, 128.9, 127.7, 125.3, 124.7, 124.6, 124.1, 122.9, 120.5, 118.9, 116.7, 103.4, 46.5, 44.3, 30.3. IR: 1758, 1698, 1645, 1450, 1381, 1340, 1198, 1161, 1071, 825, 757 cm<sup>-1</sup>. HRMS (ESI) *m/z*: calcd for C<sub>25</sub>H<sub>18</sub>BrNO<sub>3</sub>Na [M + H]<sup>+</sup>, 482.0362; found, 482.0365.

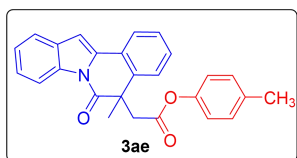

*P-Tolyl* 2-(5-methyl-6-oxo-5,6-dihydroindolo[2,1-a]isoquinolin-5-yl)acetate

(**3ae**). Purification by column chromatography on silica gel (petroleum ether/ethyl acetate = 20:1, v/v) afforded the title compound as a yellow solid (36 mg, 90% yield). Mp: 79–82 °C. <sup>1</sup>H NMR (600 MHz, CDCl<sub>3</sub>) δ 8.59 (d, *J* = 8.3 Hz, 1H), 7.89 (d, *J* = 9.3 Hz, 1H), 7.58 (d, *J* = 7.7 Hz, 1H), 7.46 – 7.34 (m, 4H), 7.32 – 7.29 (m, 1H), 7.04 (s, 1H), 6.96 (d, *J* = 8.7 Hz, 2H), 6.53 (d, *J* = 8.5 Hz, 2H), 4.01 (d, *J* = 16.9 Hz, 1H), 3.35 (d, *J* = 16.9 Hz, 1H), 2.20 (s, 3H), 1.70 (s, 3H). <sup>13</sup>C NMR (151 MHz, CDCl<sub>3</sub>) δ 172.3, 169.0, 147.9, 137.5, 135.5, 135.4, 135.3, 130.6, 129.6, 128.9, 127.5, 125.3, 125.2, 124.8, 124.5, 124.1, 120.8, 120.4, 116.7, 103.3, 46.5, 44.4, 30.3, 20.7. IR: 1756, 1696, 1506, 1450, 1381, 1342, 1196, 1165, 1018, 813, 754 cm<sup>-1</sup>. HRMS (ESI) *m/z*: calcd for C<sub>26</sub>H<sub>21</sub>NO<sub>3</sub>Na [M + Na]<sup>+</sup>, 418.1414; found, 418.1406.

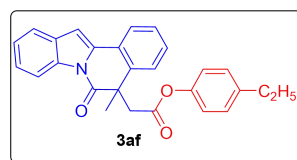

*4-Ethylphenyl* 2-(5-methyl-6-oxo-5,6-dihydroindolo[2,1-a]isoquinolin-5-yl)acetate

(**3af**). Purification by column chromatography on silica gel (petroleum ether/ethyl acetate = 20:1, v/v) afforded the title compound as a yellow solid (39 mg, 96% yield). Mp: 68–72 °C. <sup>1</sup>H NMR (600 MHz, CDCl<sub>3</sub>)

δ 8.59 (d, *J* = 8.2 Hz, 1H), 7.93 – 7.84 (m, 1H), 7.58 (d, *J* = 7.7 Hz, 1H), 7.48 – 7.28 (m, 5H), 7.04 (s, 1H), 6.99 (d, *J* = 8.4 Hz, 2H), 6.57 (d, *J* = 8.5 Hz, 2H), 4.01 (d, *J* = 16.9 Hz, 1H), 3.35 (d, *J* = 16.9 Hz, 1H), 2.51 (q, *J* = 7.6 Hz, 2H), 1.71 (s, 3H), 1.17 – 1.06 (m, 3H). <sup>13</sup>C NMR (151 MHz, CDCl<sub>3</sub>) δ 172.2, 169.0, 148.1, 141.7, 137.5, 135.5, 135.3, 130.6, 128.9, 128.5, 127.5, 125.3, 125.2, 124.8, 124.5, 124.1, 120.9, 120.4, 116.7, 103.3, 46.5, 44.4, 30.3, 28.1, 15.4. IR: 1756, 1696, 1643, 1506, 1452, 1381, 1342, 1200, 1158, 815, 750 cm<sup>-1</sup>. HRMS (ESI) *m/z*: calcd for C<sub>27</sub>H<sub>23</sub>NO<sub>3</sub>Na [M + Na]<sup>+</sup>, 432.1570; found, 432.1579.

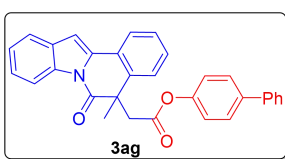

[1,1'-Biphenyl]-4-yl 2-(5-methyl-6-oxo-5,6-dihydroindolo[2,1-a]isoquinolin-5-yl)acetate

(**3ag**). Purification by column chromatography on silica gel (petroleum ether/ethyl acetate = 15:1, v/v) afforded the title compound as a yellow solid (33 mg, 71% yield). Mp: 101–107 °C. <sup>1</sup>H NMR (600 MHz, CDCl<sub>3</sub>)

δ 8.60 (d, *J* = 8.2 Hz, 1H), 7.93 – 7.88 (m, 1H), 7.59 (d, *J* = 8.7 Hz, 1H), 7.48 – 7.46 (m, 1H), 7.44 – 7.35 (m, 9H), 7.33 – 7.28 (m, 2H), 7.06 (s, 1H), 6.74 (d, *J* = 8.8 Hz, 2H), 4.05 (d, *J* = 17.0 Hz, 1H), 3.39 (d, *J* = 16.9 Hz, 1H), 1.72 (s, 3H). <sup>13</sup>C NMR (151 MHz, CDCl<sub>3</sub>) δ 172.2, 169.0, 149.5, 140.2, 138.9, 137.4, 135.5, 135.3, 130.6, 128.9, 128.7, 127.9, 127.6, 127.2, 127.0, 125.3, 125.2, 124.8, 124.5, 124.1, 121.4, 120.5, 116.7, 103.4, 46.5, 44.4, 30.3. IR: 1757, 1698, 1602, 1486, 1449, 1382, 1343, 1262, 1172, 1085, 831, 755 cm<sup>-1</sup>. HRMS (ESI) *m/z*: calcd for C<sub>31</sub>H<sub>23</sub>NO<sub>3</sub>Na [M + Na]<sup>+</sup>, 480.1570; found, 480.1569.

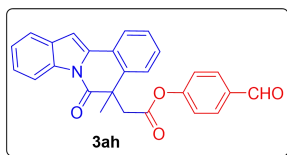

*4-Formylphenyl* 2-(5-methyl-6-oxo-5,6-dihydroindolo[2,1-a]isoquinolin-5-yl)acetate (**3ah**). Purification by column chromatography on silica gel (petroleum ether/ethyl acetate = 10:1, v/v) afforded the title compound as a yellow solid (30 mg, 73% yield). Mp: 92–95 °C. <sup>1</sup>H NMR (600 MHz, CDCl<sub>3</sub>) δ

9.88 (s, 1H), 8.59 (d, *J* = 5.4 Hz, 1H), 7.92 (s, 1H), 7.81 – 7.71 (m, 2H), 7.61 (d, *J* = 7.3 Hz, 1H), 7.45 – 7.28 (m, 4H), 7.07 (d, *J* = 2.9 Hz, 1H), 7.00 – 6.83 (m, 3H), 4.05 (d, *J* = 17.0 Hz, 1H), 3.40 (d, *J* = 16.9 Hz, 1H), 1.74 (s, 3H). <sup>13</sup>C NMR (151 MHz, CDCl<sub>3</sub>) δ 190.8, 172.1, 168.2, 154.7, 137.2, 135.4, 135.1, 133.9, 131.0, 130.6, 129.0, 127.7, 125.3, 125.2, 124.7, 124.6, 124.2, 121.9, 120.5, 116.6, 115.9, 103.5, 46.5, 44.3, 30.3. IR: 1760, 1694, 1595, 1506, 1452, 1381, 1344, 1208, 1158, 1089, 837, 758 cm<sup>-1</sup>. HRMS (ESI) *m/z*: calcd for C<sub>26</sub>H<sub>20</sub>NO<sub>4</sub> [M + H]<sup>+</sup>, 410.1387; found, 410.1368.

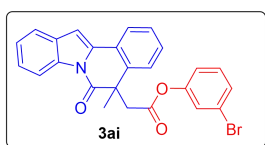

*3-Bromophenyl* 2-(5-methyl-6-oxo-5,6-dihydroindolo[2,1-a]isoquinolin-5-yl)acetate (**3ai**). Purification by column chromatography on silica gel (petroleum ether/ethyl acetate = 15:1, v/v) afforded the title compound as yellow liquid. <sup>1</sup>H

NMR (600 MHz, CDCl<sub>3</sub>) δ 8.58 (d, *J* = 8.1 Hz, 1H), 7.92 – 7.88 (m, 1H), 7.59 (d, *J* = 7.7 Hz, 1H), 7.45 – 7.30 (m, 5H), 7.21 (d, *J* = 7.1 Hz, 1H), 7.06 – 7.01 (m, 2H), 6.83 (s, 1H), 6.63 (d, *J* = 10.5 Hz, 1H), 4.00 (d, *J* = 17.0 Hz, 1H), 3.35 (d, *J* = 17.0 Hz, 1H), 1.71 (s, 3H). <sup>13</sup>C NMR (151 MHz, CDCl<sub>3</sub>) δ 172.2, 168.5, 150.5, 137.2, 135.4, 135.2, 130.6, 130.2, 129.0, 128.9, 127.7, 125.3, 125.2, 124.7, 124.7, 124.6, 124.1, 122.1, 120.5, 120.1, 118.8, 116.7, 103.5, 46.4, 44.2, 30.3. IR: 1762, 1693, 1588, 1453, 1379, 1343, 1193, 1151, 1083, 756, 674 cm<sup>-1</sup>. HRMS (ESI) *m/z*: calcd for C<sub>25</sub>H<sub>18</sub>BrNO<sub>3</sub>Na [M + Na]<sup>+</sup>, 482.0362; found, 482.0365.

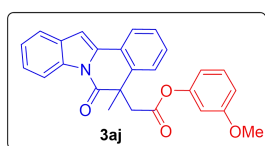

*3-Methoxyphenyl* 2-(5-methyl-6-oxo-5,6-dihydroindolo[2,1-a]isoquinolin-5-yl)acetate (**3aj**). Purification by column chromatography on silica gel (petroleum ether/ethyl acetate = 15:1, v/v) afforded the title compound as a yellow solid (31

mg, 74% yield). Mp: 81–85 °C. <sup>1</sup>H NMR (600 MHz, CDCl<sub>3</sub>) δ 8.60 (d, *J* = 8.2 Hz, 1H), 7.90 – 7.87 (m, 1H), 7.58 (d, *J* = 7.7 Hz, 1H), 7.47 – 7.35 (m, 4H), 7.33 – 7.29 (m, 1H), 7.08 – 7.02 (m, 2H), 6.63 – 6.59 (m, 1H), 6.30 – 6.26 (m, 1H), 6.14 (t, *J* = 2.3 Hz, 1H), 4.01 (d, *J* = 16.9 Hz, 1H), 3.60 (s, 3H), 3.35 (d, *J* = 16.8 Hz, 1H), 1.71 (s, 3H). <sup>13</sup>C NMR (151 MHz, CDCl<sub>3</sub>) δ 172.2, 168.7, 160.2, 151.0, 137.4, 135.4, 135.3, 130.6, 129.5, 128.9, 127.6, 125.4, 125.2, 124.8, 124.5, 124.1, 120.4, 116.7, 113.3, 111.9, 106.8, 103.3, 55.2, 46.5, 44.4, 30.3. IR: 1757, 1695, 1601, 1488, 1451, 1381, 1343, 1264, 1063, 1149, 1036, 814, 754 cm<sup>-1</sup>. HRMS (ESI) *m/z*: calcd for C<sub>26</sub>H<sub>21</sub>NO<sub>4</sub>Na [M + Na]<sup>+</sup>, 434.1363; found, 434.1373.

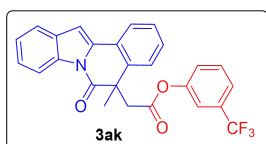

*3-(Trifluoromethyl)phenyl* 2-(5-methyl-6-oxo-5,6-dihydroindolo[2,1-a]isoquinolin-5-yl)acetate (**3ak**). Purification by column chromatography on

silica gel (petroleum ether/ethyl acetate = 10:1, v/v) afforded the title compound as a yellow solid (35 mg, 70% yield). Mp: 75–80 °C. <sup>1</sup>H NMR (600 MHz, CDCl<sub>3</sub>) δ 8.62 (d, *J* = 8.2 Hz, 1H), 7.93 (d, *J* = 8.7 Hz, 1H), 7.62 (d, *J* = 7.7 Hz, 1H), 7.50 – 7.40 (m, 4H), 7.38 – 7.29 (m, 3H), 7.09 (s, 1H), 6.91 (d, *J* = 6.2 Hz, 2H), 4.07 (d, *J* = 16.9 Hz, 1H), 3.40 (d, *J* = 16.9 Hz, 1H), 1.75 (s, 3H). <sup>13</sup>C NMR (151 MHz, CDCl<sub>3</sub>) δ 172.1, 168.5, 150.1, 137.2, 135.4, 135.1, 131.7 (d, *J*<sub>C-F</sub> = 32.8 Hz), 130.6, 129.7, 129.0, 127.8, 125.3 (d, *J*<sub>C-F</sub> = 4.5 Hz), 124.8, 124.7, 124.6, 124.1, 122.6, 120.5, 118.4 (d, *J*<sub>C-F</sub> = 4.0 Hz), 116.7, 103.5, 46.5, 44.3, 30.3. <sup>19</sup>F NMR (565 MHz, CDCl<sub>3</sub>) δ -62.79. IR: 1763, 1697, 1599, 1450, 1380, 1329, 1283, 1165, 1131, 1087, 806, 756 cm<sup>-1</sup>. HRMS (ESI) *m/z*: calcd for C<sub>26</sub>H<sub>19</sub>NO<sub>3</sub> [M + H]<sup>+</sup>, 450.1312; found, 450.1304.

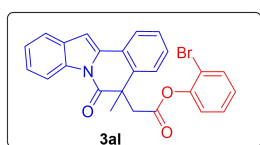

**2-Bromophenyl** 2-(5-methyl-6-oxo-5,6-dihydroindolo[2,1-a]isoquinolin-5-yl)acetate (**3al**). Purification by column chromatography on silica gel (petroleum ether/ethyl acetate = 15:1, v/v) afforded the title compound as a yellow solid (35

mg, 75% yield). Mp: 102–108 °C. <sup>1</sup>H NMR (600 MHz, CDCl<sub>3</sub>) δ 8.58 (d, *J* = 8.2 Hz, 1H), 7.90 – 7.84 (m, 1H), 7.57 (d, *J* = 7.7 Hz, 1H), 7.48 (d, *J* = 9.1 Hz, 1H), 7.44 – 7.33 (m, 4H), 7.30 (t, *J* = 7.9 Hz, 1H), 7.16 – 7.10 (m, 1H), 7.03 (s, 1H), 6.99 – 6.93 (m, 1H), 6.77 (d, *J* = 8.2 Hz, 1H), 4.06 (d, *J* = 17.3 Hz, 1H), 3.47 (d, *J* = 17.3 Hz, 1H), 1.72 (s, 3H). <sup>13</sup>C NMR (151 MHz, CDCl<sub>3</sub>) δ 172.1, 168.1, 147.8, 137.3, 135.5, 135.3, 133.1, 130.6, 128.9, 128.2, 127.6, 127.2, 125.5, 125.2, 124.9, 124.5, 124.1, 123.4, 120.4, 116.7, 115.9, 103.3, 46.3, 43.9, 30.4. IR: 1765, 1694, 1599, 1449, 1379, 1341, 1258, 1206, 1138, 808, 752 cm<sup>-1</sup>. HRMS (ESI) *m/z*: calcd for C<sub>25</sub>H<sub>18</sub>BrNO<sub>3</sub>Na [M + Na]<sup>+</sup>, 482.0362; found, 482.0365.

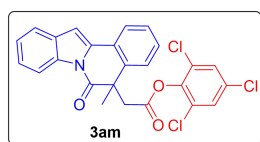

**2,4,6-Trichlorophenyl** 2-(5-methyl-6-oxo-5,6-dihydroindolo[2,1-a]isoquinolin-5-yl)acetate (**3am**). Purification by column chromatography on silica gel (petroleum ether/ethyl acetate = 15:1, v/v) afforded the title compound as a

yellow solid (34 mg, 70% yield). Mp: 74–77 °C. <sup>1</sup>H NMR (600 MHz, CDCl<sub>3</sub>) δ 8.60 (d, *J* = 8.2 Hz, 1H), 7.91 – 7.82 (m, 1H), 7.58 (d, *J* = 7.7 Hz, 1H), 7.46 (d, *J* = 6.6 Hz, 1H), 7.42 – 7.34 (m, 3H), 7.31 (s, 1H), 7.17 (s, 2H), 7.03 (s, 1H), 4.11 (d, *J* = 17.4 Hz, 1H), 3.49 (d, *J* = 17.4 Hz, 1H), 1.72 (s, 3H). <sup>13</sup>C NMR (151 MHz, CDCl<sub>3</sub>) δ 171.7, 166.7, 147.0, 142.4, 136.9, 135.4, 135.2, 131.9, 130.6, 129.3, 128.8, 128.2, 128.0, 127.6, 125.5, 125.2, 124.9, 124.5, 124.1, 121.6, 120.4, 116.7, 103.4, 46.2, 43.3, 30.5. IR: 1773, 1697, 1562, 1451, 1382, 1342, 1269, 1116, 1082, 814, 756 cm<sup>-1</sup>. HRMS (ESI) *m/z*: calcd for C<sub>25</sub>H<sub>17</sub>Cl<sub>3</sub>NO<sub>3</sub> [M + H]<sup>+</sup>, 484.0269; found, 484.0278.

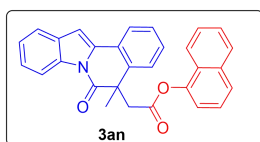

**Naphthalen-1-yl** 2-(5-methyl-6-oxo-5,6-dihydroindolo[2,1-a]isoquinolin-5-yl)acetate (**3an**). Purification by column chromatography on silica gel (petroleum ether/ethyl acetate = 20:1, v/v) afforded the title compound as a yellow solid (33

mg, 76% yield). Mp: 70–75 °C. <sup>1</sup>H NMR (600 MHz, CDCl<sub>3</sub>) δ 8.61 (d, *J* = 8.2 Hz, 1H), 7.90 (d, *J* = 7.4 Hz, 1H), 7.71 (d, *J* = 8.8 Hz, 1H), 7.66 – 7.55 (m, 3H), 7.51 – 7.28 (m, 7H), 7.13 (s, 1H), 7.04 (s, 1H), 6.78 (d, *J* = 11.3 Hz, 1H), 4.07 (d, *J* = 16.9 Hz, 1H), 3.42 (d, *J* = 16.9 Hz, 1H), 1.74 (s, 3H). <sup>13</sup>C NMR (151 MHz, CDCl<sub>3</sub>) δ 172.3, 169.0, 147.8, 137.5, 135.5, 135.3, 133.4, 131.3, 130.6, 129.1, 129.0, 127.6, 127.6, 127.5, 126.4, 125.6, 125.4, 125.2, 124.8, 124.5, 124.1, 120.6, 120.5, 118.2, 116.7, 103.4, 46.5, 44.5, 30.3. IR: 1752, 1690, 1641, 1512, 1454, 1384, 1344, 1263, 1160, 810, 750 cm<sup>-1</sup>. HRMS (ESI) *m/z*: calcd for C<sub>29</sub>H<sub>21</sub>NO<sub>3</sub>Na [M + Na]<sup>+</sup>, 454.1414; found, 454.1401.

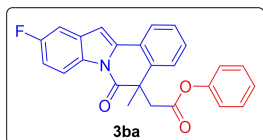

*Phenyl 2-(10-fluoro-5-methyl-6-oxo-5,6-dihydroindolo[2,1-a]isoquinolin-5-yl)acetate (3ba)*. Purification by column chromatography on silica gel (petroleum ether/ethyl acetate = 20:1, v/v) afforded the title compound as a yellow solid (28

mg, 70% yield). Mp: 97–103 °C. <sup>1</sup>H NMR (600 MHz, CDCl<sub>3</sub>) δ 8.58 – 8.50 (m, 1H), 7.87 (d, *J* = 7.5 Hz, 1H), 7.49 – 7.38 (m, 3H), 7.24 – 7.16 (m, 3H), 7.11 – 7.05 (m, 2H), 6.99 (s, 1H), 6.68 (d, *J* = 7.9 Hz, 2H), 4.01 (d, *J* = 17.1 Hz, 1H), 3.38 (d, *J* = 16.9 Hz, 1H), 1.71 (s, 3H). <sup>13</sup>C NMR (151 MHz, CDCl<sub>3</sub>) δ 172.1, 168.8, 160.2 (d, *J*<sub>C-F</sub> = 240.9 Hz), 150.1, 137.7, 136.8, 131.8, 131.7, 129.2, 129.1, 127.6, 125.8, 125.3, 124.4, 124.2, 121.1, 117.7 (d, *J*<sub>C-F</sub> = 9.2 Hz), 112.6 (d, *J*<sub>C-F</sub> = 24.9 Hz), 106.0 (d, *J*<sub>C-F</sub> = 24.1 Hz), 102.8 (d, *J*<sub>C-F</sub> = 4.1 Hz), 46.3, 44.4, 30.2. <sup>19</sup>F NMR (565 MHz, CDCl<sub>3</sub>) δ -118.12. IR: 1753, 1696, 1651, 1597, 1456, 1379, 1338, 1164, 962, 869, 766 cm<sup>-1</sup>. HRMS (ESI) *m/z*: calcd for C<sub>25</sub>H<sub>18</sub>FNO<sub>3</sub>Na [M + Na]<sup>+</sup>, 422.1163; found, 422.1167.

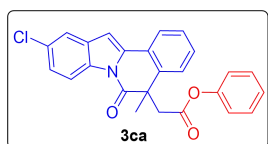

*Phenyl 2-(10-chloro-5-methyl-6-oxo-5,6-dihydroindolo[2,1-a]isoquinolin-5-yl)acetate (3ca)*. Mp: 88–91 °C. Purification by column chromatography on silica gel (petroleum ether/ethyl acetate = 20:1, v/v) afforded the title compound

as a yellow oil (19 mg, 46% yield). <sup>1</sup>H NMR (600 MHz, CDCl<sub>3</sub>) δ 8.49 (d, *J* = 8.7 Hz, 1H), 7.87 (d, *J* = 7.6 Hz, 1H), 7.53 (d, *J* = 2.1 Hz, 1H), 7.47 – 7.37 (m, 3H), 7.32 – 7.28 (m, 1H), 7.17 (t, *J* = 7.9 Hz, 2H), 7.07 (t, *J* = 7.4 Hz, 1H), 6.96 (s, 1H), 6.68 – 6.63 (m, 2H), 3.98 (d, *J* = 17.0 Hz, 1H), 3.36 (d, *J* = 17.0 Hz, 1H), 1.70 (s, 3H). <sup>13</sup>C NMR (151 MHz, CDCl<sub>3</sub>) δ 172.2, 168.8, 150.1, 137.7, 136.6, 133.8, 131.9, 130.1, 129.4, 129.2, 127.7, 125.8, 125.4, 125.2, 124.4, 124.3, 121.1, 120.0, 117.7, 102.4, 46.4, 44.5, 30.3. IR: 1755, 1699, 1643, 1595, 1446, 1371, 1185, 1165, 1070, 811, 687 cm<sup>-1</sup>. HR MS (ESI) *m/z*: calcd for C<sub>25</sub>H<sub>18</sub>ClNO<sub>3</sub>Na [M + Na]<sup>+</sup>, 438.0873; found, 438.0881.

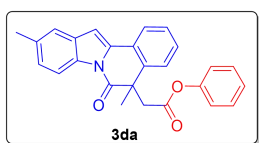

*Phenyl 2-(5,10-dimethyl-6-oxo-5,6-dihydroindolo[2,1-a]isoquinolin-5-yl)acetate (3da)*. Purification by column chromatography on silica gel (petroleum ether/ethyl acetate = 20:1, v/v) afforded the title compound as a yellow solid (18

mg, 44% yield). Mp: 110–115 °C. <sup>1</sup>H NMR (600 MHz, CDCl<sub>3</sub>) δ 8.44 (d, *J* = 8.4 Hz, 1H), 7.89 – 7.85

(m, 1H), 7.46 – 7.42 (m, 1H), 7.41 – 7.35 (m, 3H), 7.20 – 7.14 (m, 3H), 7.07 – 7.04 (m, 1H), 6.97 (s, 1H), 6.68 – 6.61 (m, 2H), 4.01 (d,  $J = 16.9$  Hz, 1H), 3.34 (d,  $J = 16.9$  Hz, 1H), 2.45 (s, 3H), 1.70 (s, 3H).  $^{13}\text{C}$  NMR (151 MHz,  $\text{CDCl}_3$ )  $\delta$  172.0, 168.9, 155.7, 150.1, 137.4, 135.3, 134.1, 133.6, 130.8, 129.6, 129.1, 128.8, 127.5, 126.5, 125.7, 125.3, 124.9, 124.0, 121.2, 120.5, 120.4, 116.3, 115.3, 103.2, 46.4, 44.3, 30.3, 21.4. IR: 1756, 1694, 1646, 1595, 1456, 1377, 1161, 1084, 967, 863, 691  $\text{cm}^{-1}$ . HRMS (ESI)  $m/z$ : calcd for  $\text{C}_{26}\text{H}_{21}\text{NO}_3\text{Na}$  [ $\text{M} + \text{Na}$ ] $^+$ , 418.1414; found, 418.1406.

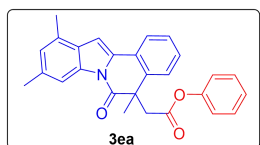

*Phenyl* 2-(5,9,11-trimethyl-6-oxo-5,6-dihydroindolo[2,1-a]isoquinolin-5-yl)acetate (**3ea**). Purification by column chromatography on silica gel (petroleum ether/ethyl acetate = 20:1, v/v) afforded the title compound as a yellow solid (36

mg, 87% yield). Mp: 110–117 °C.  $^1\text{H}$  NMR (600 MHz,  $\text{CDCl}_3$ )  $\delta$  8.28 (s, 1H), 7.90 (s, 1H), 7.46 – 7.41 (m, 1H), 7.40 – 7.36 (m, 2H), 7.19 – 7.14 (m, 2H), 7.09 – 7.04 (m, 2H), 6.97 (s, 1H), 6.66 (d,  $J = 7.5$  Hz, 2H), 4.02 (d,  $J = 16.9$  Hz, 1H), 3.35 (d,  $J = 16.9$  Hz, 1H), 2.50 (d,  $J = 30.8$  Hz, 6H), 1.70 (s, 3H).  $^{13}\text{C}$  NMR (151 MHz,  $\text{CDCl}_3$ )  $\delta$  172.3, 168.8, 150.1, 137.1, 135.6, 135.6, 134.1, 129.4, 129.1, 128.5, 127.9, 127.5, 126.4, 125.7, 125.2, 125.1, 123.8, 121.2, 114.5, 101.9, 46.5, 44.3, 30.4, 21.9, 18.4. IR: 1758, 1694, 1647, 1591, 1492, 1413, 1382, 1334, 1267, 1189, 1086, 856, 721  $\text{cm}^{-1}$ . HRMS (ESI)  $m/z$ : calcd for  $\text{C}_{27}\text{H}_{23}\text{NO}_3\text{Na}$  [ $\text{M} + \text{Na}$ ] $^+$ , 432.1570; found, 432.1579.

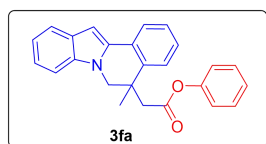

*Phenyl* 2-(5-methyl-5,6-dihydroindolo[2,1-a]isoquinolin-5-yl)acetate (**3fa**).

Purification by column chromatography on silica gel (petroleum ether/ethyl acetate = 10:1, v/v) afforded the title compound as yellow liquid (25 mg, 68% yield).  $^1\text{H}$  NMR (600 MHz,  $\text{CDCl}_3$ )  $\delta$  7.89 – 7.85 (m, 1H), 7.70 (d,  $J = 7.8$  Hz, 1H), 7.52 (d,  $J = 7.6$  Hz, 1H), 7.44 – 7.34 (m, 5H), 7.28 – 7.21 (m, 2H), 7.19 – 7.14 (m, 1H), 6.96 (s, 1H), 6.95 – 6.90 (m, 2H), 4.73 (d,  $J = 12.4$  Hz, 1H), 3.96 (d,  $J = 12.4$  Hz, 1H), 2.80 – 2.71 (m, 2H), 1.78 (s, 3H).  $^{13}\text{C}$  NMR (151 MHz,  $\text{CDCl}_3$ )  $\delta$  169.4, 150.3, 138.5, 137.0, 134.8, 129.3, 128.7, 128.0, 127.9, 127.7, 125.9, 125.0, 124.9, 121.9, 121.4, 120.7, 120.0, 109.1, 97.0, 49.3, 42.6, 38.0, 22.6. IR: 1747, 1650, 1591, 1462, 1338, 1189, 1106, 1026, 939, 797, 689  $\text{cm}^{-1}$ . HRMS (ESI)  $m/z$ : calcd for  $\text{C}_{25}\text{H}_{22}\text{NO}_2$  [ $\text{M} + \text{H}$ ] $^+$ , 368.1645; found, 368.1643.

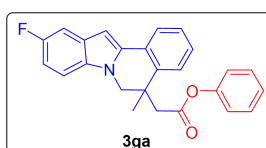

*Phenyl* 2-(10-fluoro-5-methyl-5,6-dihydroindolo[2,1-a]isoquinolin-5-yl)acetate (**3ga**). Purification by column chromatography on silica gel (petroleum ether/ethyl acetate = 20:1, v/v) afforded the title compound as yellow liquid (23

mg, 59% yield).  $^1\text{H}$  NMR (600 MHz,  $\text{CDCl}_3$ )  $\delta$  7.86 – 7.81 (m, 1H), 7.55 – 7.50 (m, 1H), 7.43 – 7.34 (m, 4H), 7.34 – 7.27 (m, 3H), 7.27 – 7.21 (m, 1H), 7.01 – 6.94 (m, 1H), 6.95 – 6.88 (m, 3H), 4.69 (d,  $J = 12.4$  Hz, 1H), 3.92 (d,  $J = 12.4$  Hz, 1H), 2.73 (d,  $J = 9.5$  Hz, 2H), 1.77 (s, 3H).  $^{13}\text{C}$  NMR (151 MHz,

CDCl<sub>3</sub>)  $\delta$  169.4, 158.1 (d,  $J_{C-F}$  = 234.5 Hz), 150.2, 138.5, 136.3, 133.6, 129.4, 128.9 (d,  $J_{C-F}$  = 10.7 Hz), 128.2, 127.8, 127.7, 125.9, 125.0, 124.9, 121.4, 110.4, 110.2, 109.7 (d,  $J_{C-F}$  = 9.7 Hz), 105.4 (d,  $J_{C-F}$  = 23.7 Hz), 96.9 (d,  $J_{C-F}$  = 4.9 Hz), 49.4, 42.6, 38.0, 22.5. <sup>19</sup>F NMR (565 MHz, CDCl<sub>3</sub>)  $\delta$  -124.38. IR: 1746, 1647, 1485, 1458, 1344, 1196, 1114, 1064, 936, 857, 791 cm<sup>-1</sup>. HRMS (ESI)  $m/z$ : calcd for C<sub>25</sub>H<sub>21</sub>FNO<sub>2</sub> [M + H]<sup>+</sup>, 386.1551; found, 386.1554.

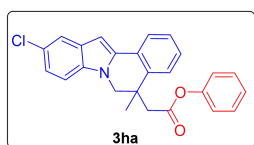

*Phenyl 2-(10-chloro-5-methyl-5,6-dihydroindolo[2,1-a]isoquinolin-5-yl)acetate (3ha)*. Purification by column chromatography on silica gel (petroleum ether/ethyl acetate = 20:1, v/v) afforded the title compound as yellow liquid (22 mg, 55% yield).

<sup>1</sup>H NMR (600 MHz, CDCl<sub>3</sub>)  $\delta$  7.81 (d,  $J$  = 5.4 Hz, 1H), 7.62 (d,  $J$  = 2.0 Hz, 1H), 7.50 (d,  $J$  = 7.4 Hz, 1H), 7.40 – 7.31 (m, 4H), 7.30 – 7.20 (m, 2H), 7.18 – 7.13 (m, 1H), 6.90 (d,  $J$  = 8.6 Hz, 2H), 6.85 (s, 1H), 4.67 (d,  $J$  = 12.4 Hz, 1H), 3.89 (d,  $J$  = 12.4 Hz, 1H), 2.69 (d,  $J$  = 7.3 Hz, 2H), 1.74 (s, 3H). <sup>13</sup>C NMR (151 MHz, CDCl<sub>3</sub>)  $\delta$  169.4, 150.2, 138.6, 136.0, 135.3, 129.6, 129.4, 128.3, 127.8, 127.6, 125.9, 125.6, 125.0, 124.9, 122.2, 121.4, 120.0, 110.1, 96.5, 49.3, 42.6, 38.0, 22.5. IR: 1746, 1639, 1593, 1455, 1336, 1190, 1102, 1063, 937, 865, 795 cm<sup>-1</sup>. HRMS (ESI)  $m/z$ : calcd for C<sub>25</sub>H<sub>21</sub>ClNO<sub>2</sub> [M + H]<sup>+</sup>, 402.1255; found, 402.1243.

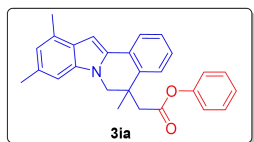

*Phenyl 2-(5,9,11-trimethyl-5,6-dihydroindolo[2,1-a]isoquinolin-5-yl)acetate (3ia)*.

Purification by column chromatography on silica gel (petroleum ether/ethyl acetate = 20:1, v/v) afforded the title compound as a yellow solid (23 mg, 56% yield).

Mp: 82–84 °C. <sup>1</sup>H NMR (600 MHz, CDCl<sub>3</sub>)  $\delta$  7.89 (d,  $J$  = 7.4 Hz, 1H), 7.53 (d,  $J$  = 7.8 Hz, 1H), 7.47 – 7.32 (m, 4H), 7.30 – 7.23 (m, 1H), 7.09 (s, 1H), 6.96 (d,  $J$  = 5.9 Hz, 3H), 6.85 (s, 1H), 4.69 (d,  $J$  = 12.4 Hz, 1H), 3.93 (d,  $J$  = 12.4 Hz, 1H), 2.83 – 2.72 (m, 2H), 2.64 (s, 3H), 2.52 (s, 3H), 1.80 (s, 3H). <sup>13</sup>C NMR (151 MHz, CDCl<sub>3</sub>)  $\delta$  169.5, 150.3, 138.2, 137.1, 133.7, 132.1, 129.9, 129.3, 128.3, 127.7, 127.5, 126.5, 125.8, 125.0, 124.6, 122.2, 121.5, 106.7, 95.5, 49.4, 42.6, 38.0, 22.5, 21.8, 18.7. IR: 1753, 1595, 1457, 1336, 1297, 1239, 1185, 1103, 1023, 939, 811, 696 cm<sup>-1</sup>. HRMS (ESI)  $m/z$ : calcd for C<sub>27</sub>H<sub>26</sub>NO<sub>2</sub> [M + H]<sup>+</sup>, 396.1958; found, 396.1952.

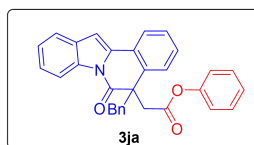

*Phenyl 2-(5-benzyl-6-oxo-5,6-dihydroindolo[2,1-a]isoquinolin-5-yl)acetate (3ja)*.

Purification by column chromatography on silica gel (petroleum ether/ethyl acetate = 15:1, v/v) afforded the title compound as a yellow solid (40 mg, 89% yield).

Mp: 86–95 °C. <sup>1</sup>H NMR (600 MHz, CDCl<sub>3</sub>)  $\delta$  8.60 (d,  $J$  = 8.2 Hz, 1H), 7.72 – 7.66 (m, 1H), 7.50 – 7.40 (m, 3H), 7.40 – 7.32 (m, 2H), 7.29 – 7.23 (m, 1H), 7.21 – 7.14 (m, 2H), 7.10 – 7.04 (m, 1H), 6.96 – 6.90 (m, 1H), 6.85 – 6.79 (m, 2H), 6.73 – 6.65 (m, 3H), 6.60 – 6.55 (m, 2H), 4.22 (d,  $J$  = 17.0 Hz, 1H), 3.55 – 3.49 (m, 2H), 3.14 (d,  $J$  = 12.7 Hz, 1H). <sup>13</sup>C NMR (151 MHz, CDCl<sub>3</sub>)  $\delta$  171.1, 168.9, 155.7,

150.1, 135.0, 134.9, 134.8, 134.1, 130.3, 129.6, 129.4, 129.1, 128.5, 127.7, 127.5, 126.9, 126.5, 125.7, 125.6, 125.0, 124.3, 123.7, 121.1, 120.5, 120.3, 116.4, 115.3, 103.0, 52.4, 49.8, 43.1 IR: 1758, 1690, 1595, 1490, 1449, 1378, 1344, 1265, 1194, 1153, 1019, 935, 814, 755  $\text{cm}^{-1}$ . HRMS (ESI)  $m/z$ : calcd for  $\text{C}_{31}\text{H}_{23}\text{NO}_3\text{Na}$   $[\text{M} + \text{Na}]^+$ , 480.1570; found, 480.1569.

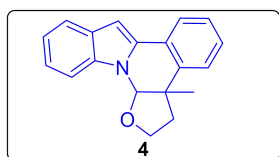

*3a-Methyl-2,3,3a,13a-tetrahydrofuro[2,3-c]indolo[2,1-a]isoquinoline* (4).

Purification by column chromatography on silica gel (petroleum ether/ethyl acetate = 2:1, v/v) afforded the title compound as a white solid (39 mg, 70% yield). Mp: 82–89 °C.  $^1\text{H}$  NMR (600 MHz,  $\text{CDCl}_3$ )  $\delta$  7.84 – 7.80 (m, 1H), 7.61 (d,  $J = 5.5$  Hz, 2H), 7.47 – 7.42 (m, 1H), 7.32 – 7.27 (m, 2H), 7.23 – 7.20 (m, 1H), 7.15 – 7.12 (m, 1H), 6.93 (s, 1H), 5.87 (s, 1H), 4.03 – 3.98 (m, 1H), 3.77 – 3.71 (m, 1H), 2.59 – 2.54 (m, 1H), 2.32 – 2.26 (m, 1H), 1.48 (s, 3H).  $^{13}\text{C}$  NMR (151 MHz,  $\text{CDCl}_3$ )  $\delta$  139.5, 136.7, 135.1, 128.7, 128.0, 127.7, 127.2, 125.0, 124.8, 121.7, 120.7, 119.9, 108.9, 96.5, 59.4, 50.7, 42.0, 37.7, 23.6. IR: 1459, 1376, 1316, 1269, 1045, 1007, 919, 757  $\text{cm}^{-1}$ . HRMS (ESI)  $m/z$ : calcd for  $\text{C}_{19}\text{H}_{18}\text{NO}$   $[\text{M} + \text{H}]^+$ , 276.1383; found, 276.1384.

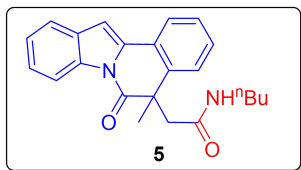

*N-Butyl-2-(5-methyl-6-oxo-5,6-dihydroindolo[2,1-a]isoquinolin-5-yl)acetamide* (5). Purification by column chromatography on silica gel

(petroleum ether/ethyl acetate = 10:1, v/v) afforded the title compound as a white solid (69 mg, 96%). Mp: 101–107 °C.  $^1\text{H}$  NMR (600 MHz,  $\text{CDCl}_3$ )  $\delta$  8.60 (d,  $J = 8.2$  Hz, 1H), 7.85 (d,  $J = 9.3$  Hz, 1H), 7.59 (d,  $J = 7.6$  Hz, 1H), 7.37 – 7.29 (m, 5H), 7.03 (s, 1H), 5.75 (s, 1H), 3.53 (d,  $J = 15.3$  Hz, 1H), 2.94 – 2.84 (m, 3H), 1.59 (s, 3H), 1.15 – 1.09 (m, 2H), 1.06 – 1.00 (m, 2H), 0.70 (t,  $J = 7.3$  Hz, 3H).  $^{13}\text{C}$  NMR (151 MHz,  $\text{CDCl}_3$ )  $\delta$  173.0, 169.2, 137.8, 135.5, 135.4, 130.7, 128.6, 127.1, 125.5, 124.9, 124.5, 124.3, 123.9, 120.4, 116.6, 102.9, 46.7, 46.2, 38.9, 31.2, 29.9, 19.7, 13.5. IR: 1700, 1641, 1596, 1556, 1451, 1372, 1341, 1263, 1176, 1077, 951, 803, 754  $\text{cm}^{-1}$ . HRMS (ESI)  $m/z$ : calcd for  $\text{C}_{23}\text{H}_{24}\text{N}_2\text{O}_2\text{Na}$   $[\text{M} + \text{Na}]^+$ , 383.1735; found, 383.1750.



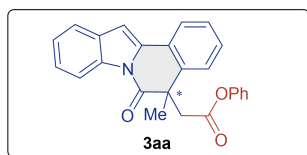

**(3aa)**. Yellow solid (34 mg, 87% yield). Specific Rotation  $[\alpha]^{25}_D = -49.9^\circ$  ( $c = 1.0$  in  $\text{CHCl}_3$ ) for 87% *ee*. HPLC (Chiralpak-IC column, hexane/isopropanol = 95/5, flow rate: 0.8 mL/min):  $t_{\text{major}} = 25.969$  min;  $t_{\text{minor}} = 20.944$  min.

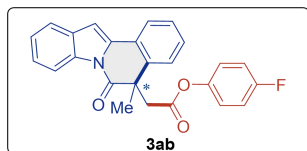

**(3ab)**. Yellow solid (19 mg, 47% yield). Specific Rotation  $[\alpha]^{25}_D = -81.6^\circ$  ( $c = 1.0$  in  $\text{CHCl}_3$ ) for 82% *ee*. HPLC (Chiralpak-IC column, hexane/isopropanol = 95/5, flow rate: 0.8 mL/min):  $t_{\text{major}} = 19.287$  min;  $t_{\text{minor}} = 16.972$  min.

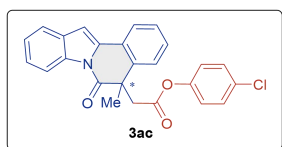

**(3ac)**. Yellow solid (18 mg, 43% yield). Specific Rotation  $[\alpha]^{25}_D = -116^\circ$  ( $c = 1.0$  in  $\text{CHCl}_3$ ) for 82% *ee*. HPLC (Chiralpak-IC column, hexane/isopropanol = 95/5, flow rate: 0.8 mL/min):  $t_{\text{major}} = 17.616$  min;  $t_{\text{minor}} = 15.842$  min.

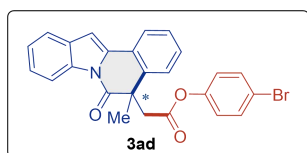

**(3ad)**. Yellow solid (38 mg, 83% yield). Specific Rotation  $[\alpha]^{25}_D = -93.8^\circ$  ( $c = 1.0$  in  $\text{CHCl}_3$ ) for 78% *ee*. HPLC (Chiralpak-IC column, hexane/isopropanol = 95/5, flow rate: 0.8 mL/min):  $t_{\text{major}} = 22.477$  min;  $t_{\text{minor}} = 20.527$  min.

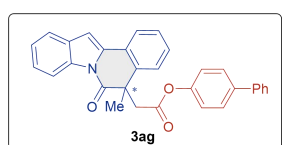

**(3ag)**. Yellow solid (27 mg, 61% yield). Specific Rotation  $[\alpha]^{25}_D = -77.1^\circ$  ( $c = 1.0$  in  $\text{CHCl}_3$ ) for 84% *ee*. HPLC (Chiralpak-IB column, hexane/isopropanol = 90/10, flow rate: 0.8 mL/min):  $t_{\text{major}} = 18.294$  min;  $t_{\text{minor}} = 19.509$  min.

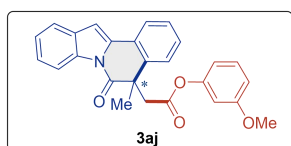

**(3aj)**. Yellow solid (34 mg, 84% yield). Specific Rotation  $[\alpha]^{25}_D = -91.5^\circ$  ( $c = 1.0$  in  $\text{CHCl}_3$ ) for 81% *ee*. HPLC (Chiralpak-IC column, hexane/isopropanol = 80/20, flow rate: 0.8 mL/min):  $t_{\text{major}} = 19.500$  min;  $t_{\text{minor}} = 16.451$  min.

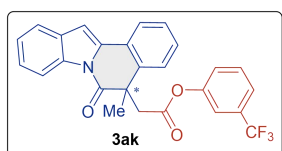

**(3ak)**. Yellow solid (27 mg, 60% yield). Specific Rotation  $[\alpha]^{25}_D = -84.0^\circ$  ( $c = 1.0$  in  $\text{CHCl}_3$ ) for 78% *ee*. HPLC (Chiralpak-IC column, hexane/isopropanol = 90/10, flow rate: 0.8 mL/min):  $t_{\text{major}} = 7.660$  min;  $t_{\text{minor}} = 7.042$  min.

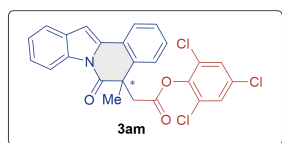

**(3am)**. Yellow solid (38 mg, 80% yield). Specific Rotation  $[\alpha]^{25}_D = -14.4^\circ$  ( $c = 1.0$  in  $\text{CHCl}_3$ ) for 80% *ee*. HPLC (Chiralpak-IC column, hexane/isopropanol = 98/2, flow rate: 0.8 mL/min):  $t_{\text{major}} = 16.344$  min;  $t_{\text{minor}} = 14.585$  min.

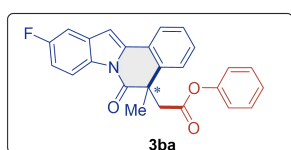

**(3ba)**. Yellow solid (18 mg, 44% yield). Specific Rotation  $[\alpha]^{25}_D = -47.5^\circ$  ( $c = 1.0$  in  $\text{CHCl}_3$ ) for 81% *ee*. HPLC (Chiralpak-AD column, hexane/isopropanol = 90/10, flow rate: 0.8 mL/min):  $t_{\text{major}} = 21.654$  min;  $t_{\text{minor}} = 24.537$  min.

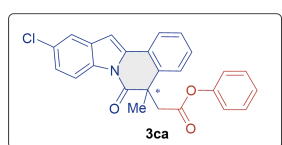

**(3ca)**. Yellow solid (17 mg, 43% yield). Specific Rotation  $[\alpha]^{25}_D = -20.1^\circ$  ( $c = 1.0$  in  $\text{CHCl}_3$ ) for 80% *ee*. HPLC (Chiralpak-AD column, hexane/isopropanol = 90/10, flow rate: 0.8 mL/min):  $t_{\text{major}} = 17.851$  min;  $t_{\text{minor}} = 21.584$  min.

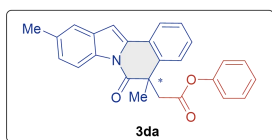

**(3da)**. Yellow solid (20 mg, 52% yield). Specific Rotation  $[\alpha]_{25}^D = -57.4^\circ$  ( $c = 1.0$  in  $\text{CHCl}_3$ ) for 80% ee. HPLC (Chiralpak-IC column, hexane/isopropanol = 90/10, flow rate: 0.8 mL/min):  $t_{\text{major}} = 18.426$  min;  $t_{\text{minor}} = 14.974$  min.

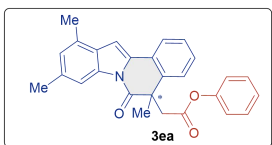

**(3ea)**. Yellow solid (27 mg, 67% yield). Specific Rotation  $[\alpha]_{25}^D = -144.5^\circ$  ( $c = 1.0$  in  $\text{CHCl}_3$ ) for 86% ee. HPLC (Chiralpak-IC column, hexane/isopropanol = 90/10, flow rate: 0.8 mL/min):  $t_{\text{major}} = 10.980$  min;  $t_{\text{minor}} = 12.080$  min.

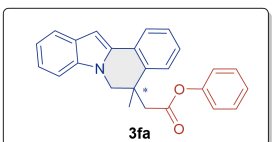

**(3fa')**. Yellow liquid (29 mg, 79% yield). Specific Rotation  $[\alpha]_{25}^D = -119.4^\circ$  ( $c = 1.0$  in  $\text{CHCl}_3$ ) for 64% ee. HPLC (Chiralpak-AD column, hexane/isopropanol = 95/5, flow rate: 0.8 mL/min):  $t_{\text{major}} = 11.178$  min;  $t_{\text{minor}} = 13.292$  min.

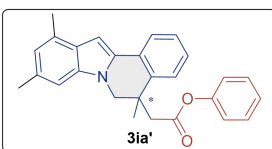

**(3ia')**. Yellow solid (25 mg, 64% yield). Specific Rotation  $[\alpha]_{25}^D = -93.9^\circ$  ( $c = 1.0$  in  $\text{CHCl}_3$ ) for 70% ee. HPLC (Chiralpak-IB column, hexane/isopropanol = 95/5, flow rate: 0.8 mL/min):  $t_{\text{major}} = 9.872$  min;  $t_{\text{minor}} = 11.215$  min.

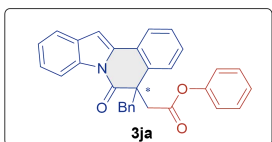

**(3ja)**. Yellow solid (26 mg, 57% yield). Specific Rotation  $[\alpha]_{25}^D = 57^\circ$  ( $c = 1.0$  in  $\text{CHCl}_3$ ) for 84% ee. HPLC (Chiralpak-AD column, hexane/isopropanol = 85/15, flow rate: 0.8 mL/min):  $t_{\text{major}} = 22.246$  min;  $t_{\text{minor}} = 15.702$  min.

## 9. X-Ray Analysis Data of Single Crystal **3aa** (CCDC 2295989)

The crystal of product **3aa** was obtained by slow evaporation in *n*-hexane and dichloromethane. The single crystal X-ray analysis determined the structure of product **3aa** (Fig. S1) as expected.

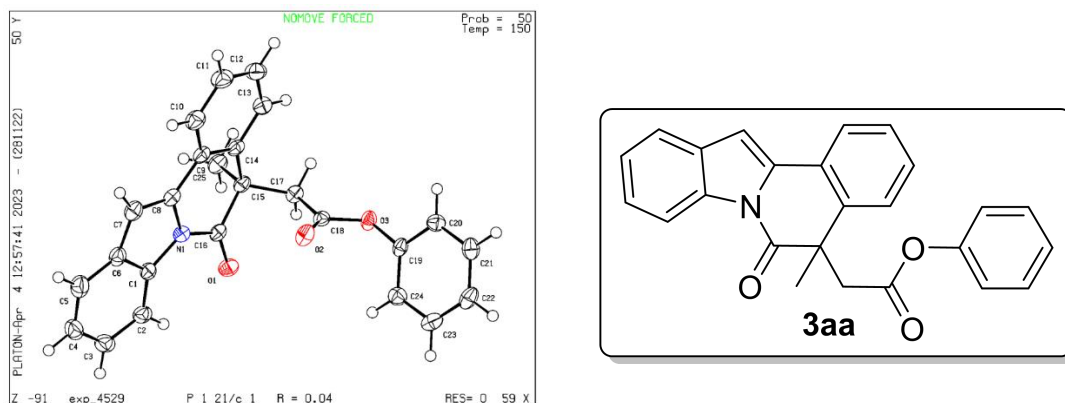

**Fig. S1. X-ray structure of 3aa. Thermal ellipsoids shown at 50% probability.**

|                        |                                                  |                                                  |              |
|------------------------|--------------------------------------------------|--------------------------------------------------|--------------|
| Bond precision:        | C-C = 0.0021 Å                                   | Wavelength=0.71073                               |              |
| Cell:                  | a=11.8280(9)                                     | b=14.9837(9)                                     | c=11.0984(9) |
|                        | alpha=90                                         | beta=106.250(8)                                  | gamma=90     |
| Temperature:           | 150 K                                            |                                                  |              |
|                        | Calculated                                       | Reported                                         |              |
| Volume                 | 1888.4(3)                                        | 1888.4(2)                                        |              |
| Space group            | P 21/c                                           | P 1 21/c 1                                       |              |
| Hall group             | -P 2ybc                                          | -P 2ybc                                          |              |
| Moiety formula         | C <sub>25</sub> H <sub>19</sub> N O <sub>3</sub> | C <sub>25</sub> H <sub>19</sub> N O <sub>3</sub> |              |
| Sum formula            | C <sub>25</sub> H <sub>19</sub> N O <sub>3</sub> | C <sub>25</sub> H <sub>19</sub> N O <sub>3</sub> |              |
| Mr                     | 381.41                                           | 381.41                                           |              |
| Dx, g cm <sup>-3</sup> | 1.342                                            | 1.342                                            |              |
| Z                      | 4                                                | 4                                                |              |
| Mu (mm <sup>-1</sup> ) | 0.088                                            | 0.088                                            |              |
| F000                   | 800.0                                            | 800.0                                            |              |
| F000'                  | 800.37                                           |                                                  |              |
| h,k,lmax               | 14,17,13                                         | 14,17,13                                         |              |
| Nref                   | 3321                                             | 3320                                             |              |

|                                                               |                                |             |
|---------------------------------------------------------------|--------------------------------|-------------|
| Tmin,Tmax                                                     | 0.988,0.991                    | 0.502,1.000 |
| Tmin'                                                         | 0.988                          |             |
| Correction method= # Reported T Limits: Tmin=0.502 Tmax=1.000 |                                |             |
| AbsCorr = MULTI-SCAN                                          |                                |             |
| Data completeness= 1.000                                      | T heta(max)= 24.997            |             |
| R(reflections)= 0.0385(2840)                                  | wR2(reflections)= 0.0953(3320) |             |
| S = 1.030                                                     | Npar= 263                      |             |

## 10. References

1. Qi, H.; Chi, D.; Chen, S. *Org. Lett.* **2022**, *24*, 2910-2914.
2. Lu, H.; Yang, X.; Zhou, L.; Li, W.; Deng, G.; Yang, Y.; Liang, Y. *Org. Chem. Front.* **2020**, *7*, 2016-2021.
3. (a) Katafuchi, Y.; Fujihara, T.; Iwai, T.; Terao, J.; Tsuji, Y. *Adv. Synth.* **2011**, *353*, 475-482. (b) Álvarez-Calero, J. M.; Jorge, Z. D.; Massanet, G. M. *Org. Lett.* **2016**, *18*, 6344-6347. (c) Ruble, J. C.; Maddocks, C. J.; Aathimanikandan, S. V.; Richardson, J. *Synlett* **2020**, *31*, 1608-1612.
4. Batuta, S.; Ali, M. A.; Chatterjee, A.; Alam, M. N.; Das, S.; Mandal, D.; Begum, N. A. *Synth. Commun.* **2016**, *46*, 692-700.

## 11. Chiral HPLC Charts and NMR Spectra

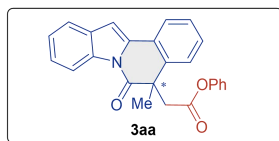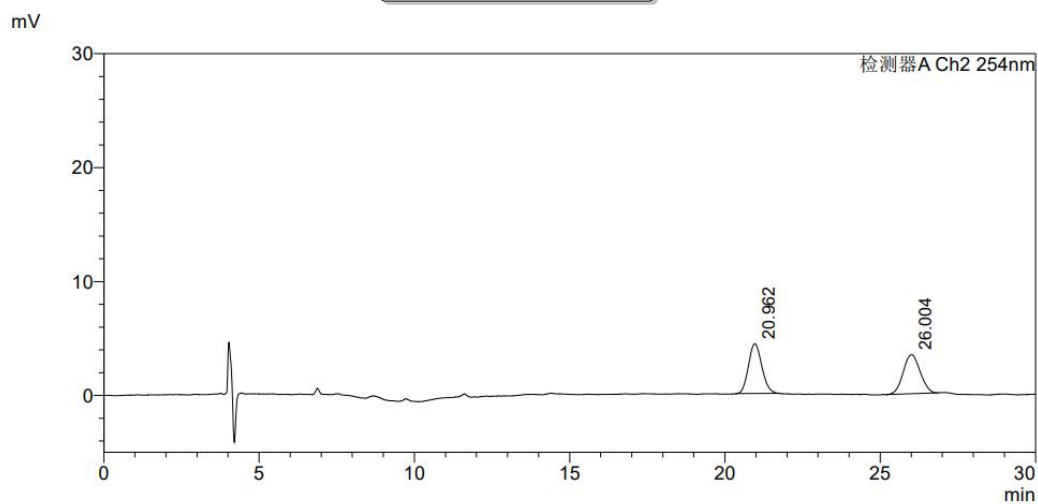

<Peak Table>

检测器A Ch2 254nm

| Peak# | Ret. Time | Area   | Height | Area%   |
|-------|-----------|--------|--------|---------|
| 1     | 20.962    | 132230 | 4378   | 50.712  |
| 2     | 26.004    | 128518 | 3422   | 49.288  |
| 总计    |           | 260748 | 7800   | 100.000 |

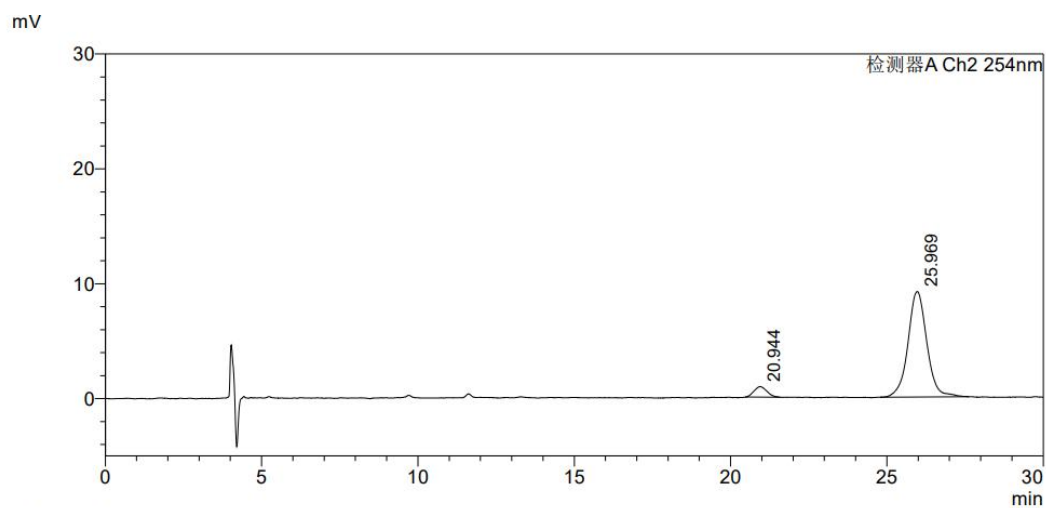

<Peak Table>

检测器A Ch2 254nm

| Peak# | Ret. Time | Area   | Height | Area%   |
|-------|-----------|--------|--------|---------|
| 1     | 20.944    | 26082  | 911    | 6.400   |
| 2     | 25.969    | 381418 | 9180   | 93.600  |
| 总计    |           | 407500 | 10090  | 100.000 |

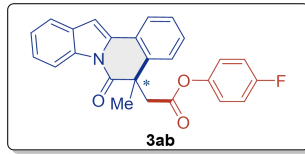

<Chromatogram>

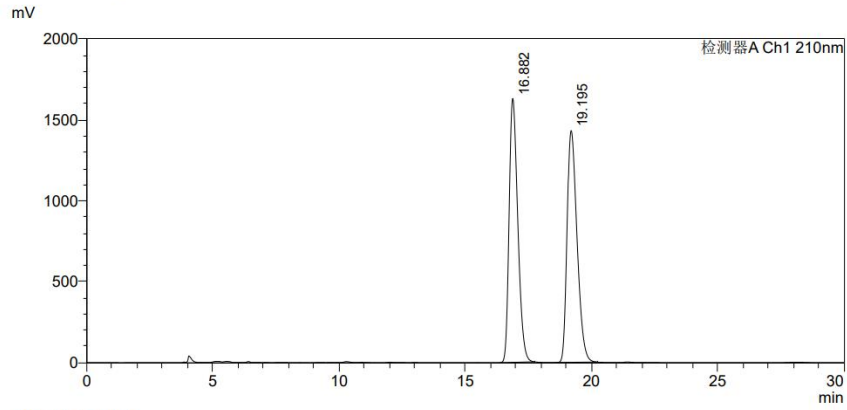

<Peak Table>

| 检测器A Ch1 210nm |           |          |         |         |
|----------------|-----------|----------|---------|---------|
| Peak#          | Ret. Time | Area     | Height  | Area%   |
| 1              | 16.882    | 39063908 | 1630798 | 49.937  |
| 2              | 19.195    | 39162956 | 1433140 | 50.063  |
| 总计             |           | 78226864 | 3063938 | 100.000 |

<Chromatogram>

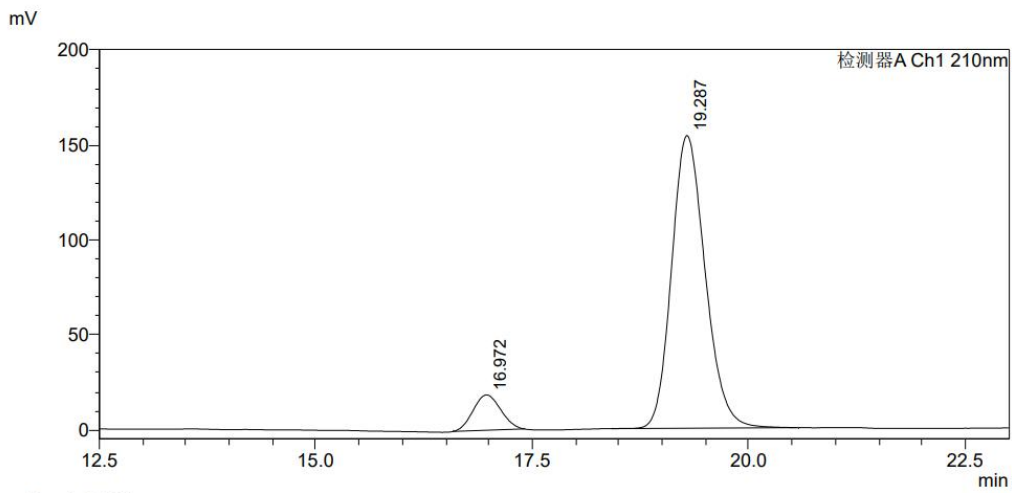

<Peak Table>

| 检测器A Ch1 210nm |           |         |        |         |
|----------------|-----------|---------|--------|---------|
| Peak#          | Ret. Time | Area    | Height | Area%   |
| 1              | 16.972    | 412453  | 18617  | 9.023   |
| 2              | 19.287    | 4158657 | 154158 | 90.977  |
| 总计             |           | 4571110 | 172776 | 100.000 |

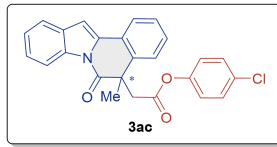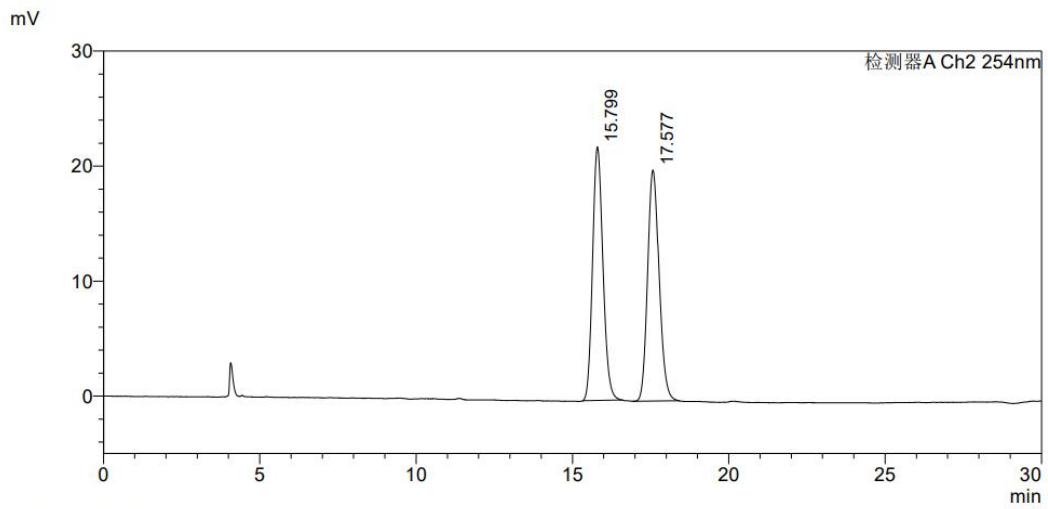

<Peak Table>

检测器A Ch2 254nm

| Peak# | Ret. Time | Area    | Height | Area%   |
|-------|-----------|---------|--------|---------|
| 1     | 15.799    | 512735  | 22050  | 50.009  |
| 2     | 17.577    | 512555  | 20076  | 49.991  |
| 总计    |           | 1025289 | 42126  | 100.000 |

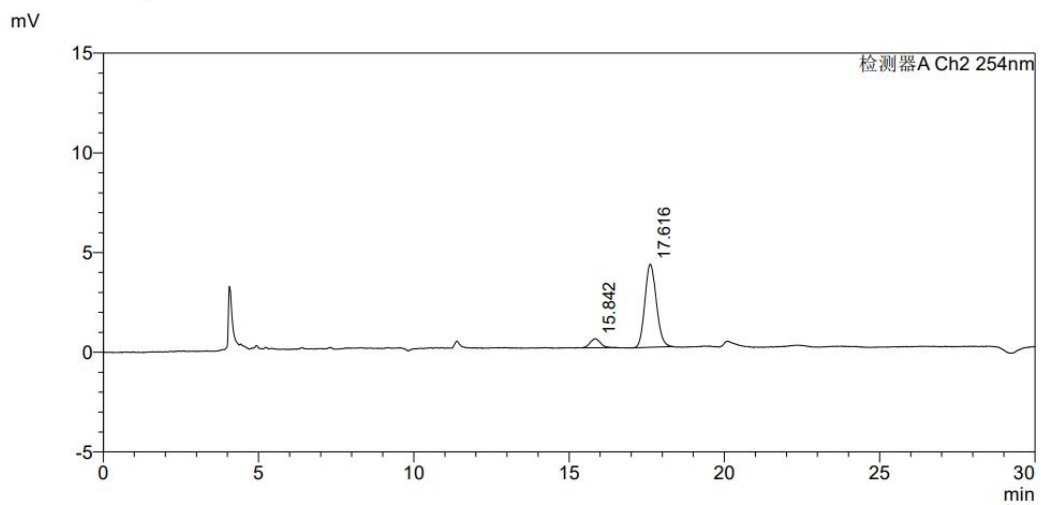

<Peak Table>

检测器A Ch2 254nm

| Peak# | Ret. Time | Area   | Height | Area%   |
|-------|-----------|--------|--------|---------|
| 1     | 15.842    | 10392  | 447    | 8.936   |
| 2     | 17.616    | 105899 | 4162   | 91.064  |
| 总计    |           | 116291 | 4609   | 100.000 |

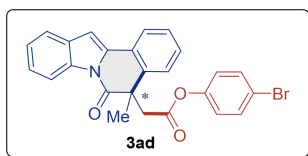

<Chromatogram>

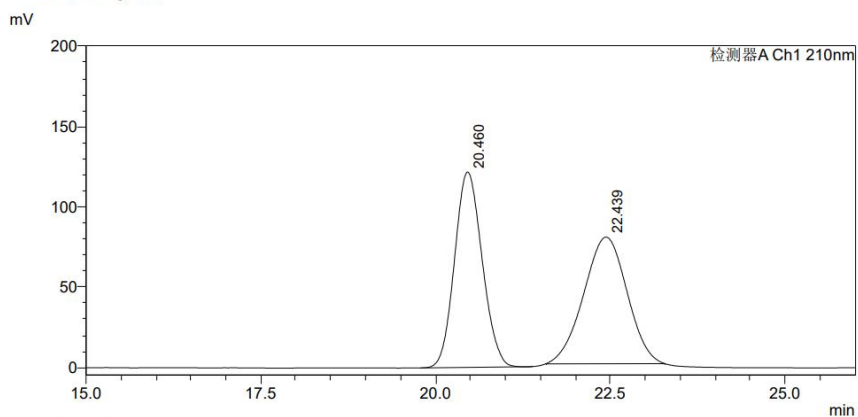

<Peak Table>

检测器A Ch1 210nm

| Peak# | Ret. Time | Area    | Height | Area%   |
|-------|-----------|---------|--------|---------|
| 1     | 20.460    | 3339370 | 121659 | 49.501  |
| 2     | 22.439    | 3406716 | 78864  | 50.499  |
| 总计    |           | 6746086 | 200523 | 100.000 |

<Chromatogram>

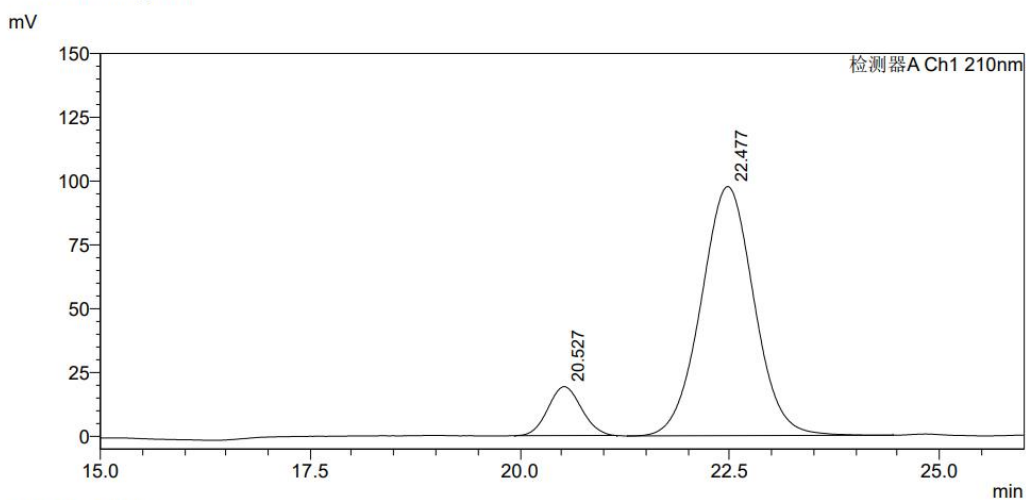

<Peak Table>

检测器A Ch1 210nm

| Peak# | Ret. Time | Area    | Height | Area%   |
|-------|-----------|---------|--------|---------|
| 1     | 20.527    | 532770  | 19181  | 11.062  |
| 2     | 22.477    | 4283570 | 97627  | 88.938  |
| 总计    |           | 4816340 | 116808 | 100.000 |



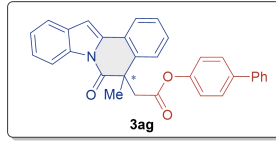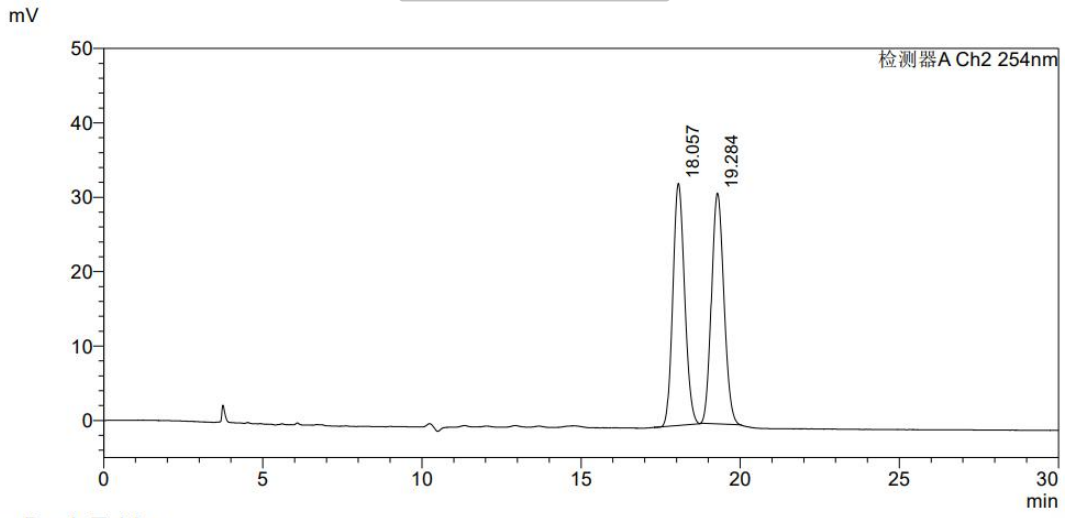

<Peak Table>

检测器A Ch2 254nm

| Peak# | Ret. Time | Area    | Height | Area%   |
|-------|-----------|---------|--------|---------|
| 1     | 18.057    | 838507  | 32541  | 49.949  |
| 2     | 19.284    | 840222  | 31022  | 50.051  |
| 总计    |           | 1678728 | 63563  | 100.000 |

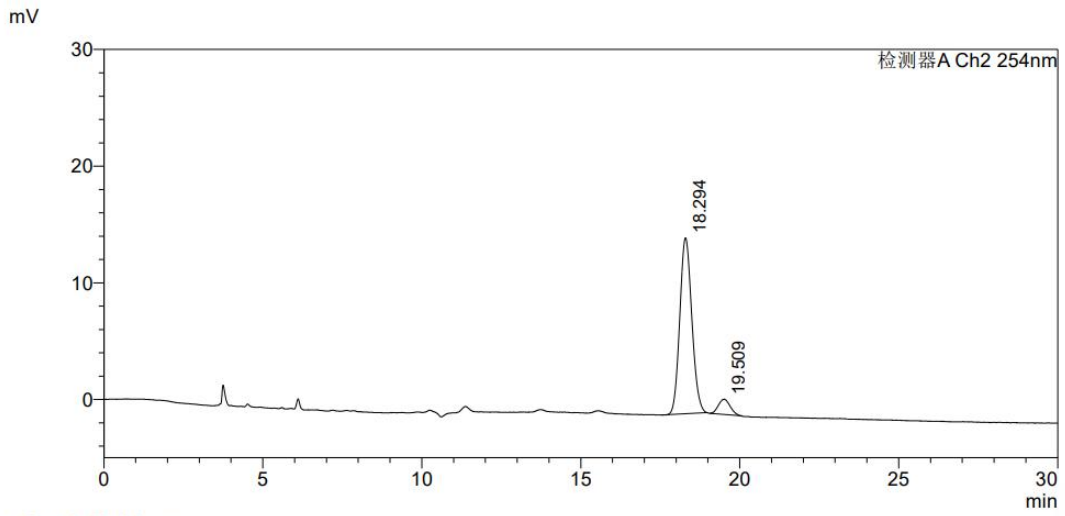

<Peak Table>

检测器A Ch2 254nm

| Peak# | Ret. Time | Area   | Height | Area%   |
|-------|-----------|--------|--------|---------|
| 1     | 18.294    | 399000 | 15079  | 92.248  |
| 2     | 19.509    | 33532  | 1304   | 7.752   |
| 总计    |           | 432532 | 16383  | 100.000 |

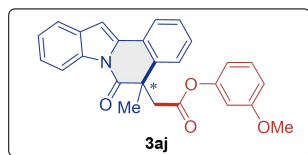

<Chromatogram>

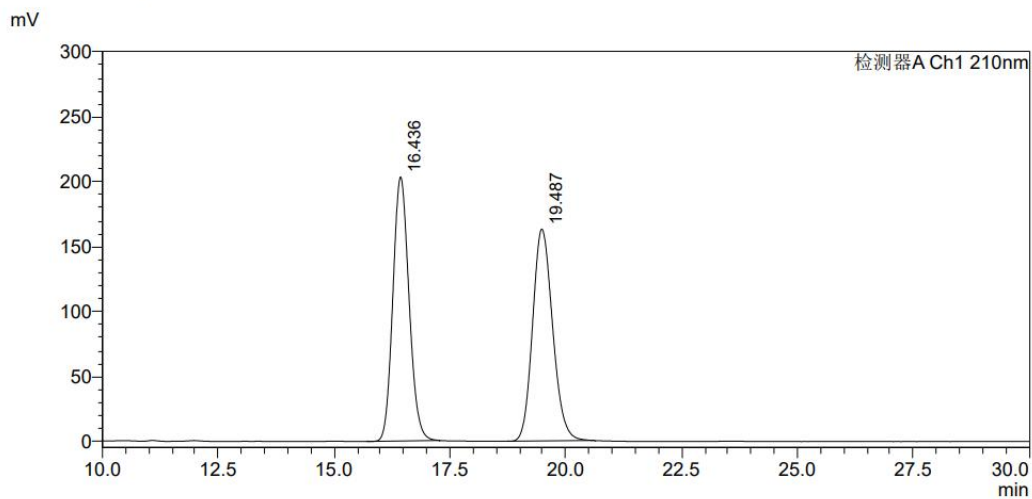

<Peak Table>

检测器A Ch1 210nm

| Peak# | Ret. Time | Area    | Height | Area%   |
|-------|-----------|---------|--------|---------|
| 1     | 16.436    | 4932773 | 203399 | 50.061  |
| 2     | 19.487    | 4920663 | 163282 | 49.939  |
| 总计    |           | 9853436 | 366681 | 100.000 |

<Chromatogram>

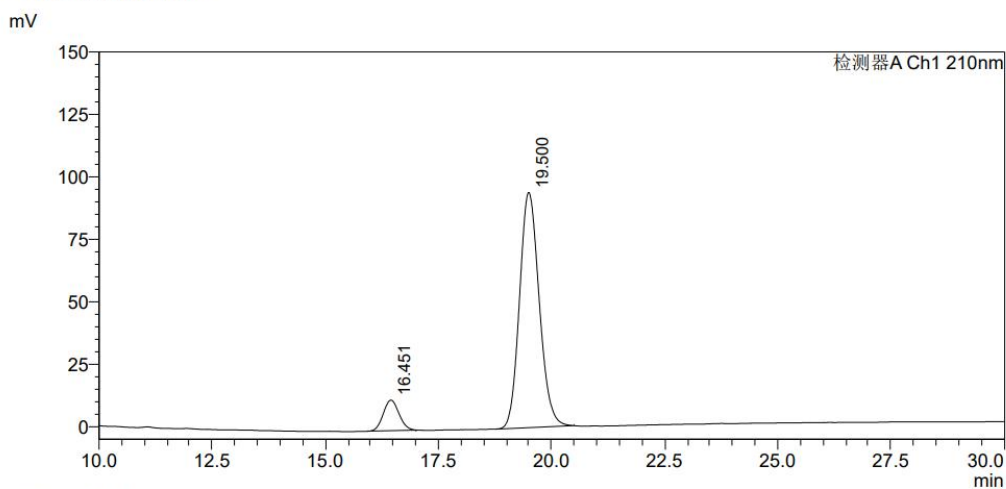

<Peak Table>

检测器A Ch1 210nm

| Peak# | Ret. Time | Area    | Height | Area%   |
|-------|-----------|---------|--------|---------|
| 1     | 16.451    | 295728  | 12243  | 9.413   |
| 2     | 19.500    | 2845990 | 94187  | 90.587  |
| 总计    |           | 3141719 | 106431 | 100.000 |

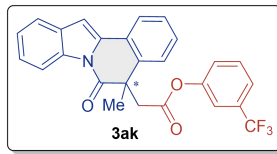

<Chromatogram>

mV

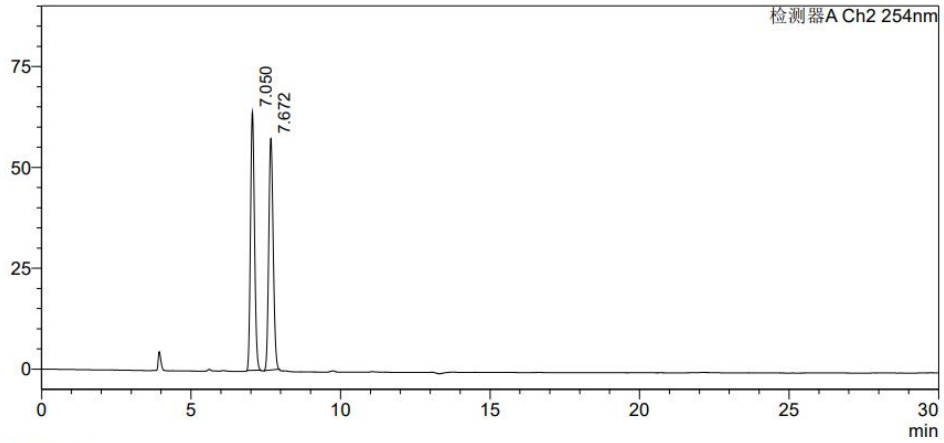

<Peak Table>

检测器A Ch2 254nm

| Peak# | Ret. Time | Area    | Height | Area%   |
|-------|-----------|---------|--------|---------|
| 1     | 7.050     | 599489  | 64016  | 50.141  |
| 2     | 7.672     | 596106  | 57358  | 49.859  |
| 总计    |           | 1195595 | 121374 | 100.000 |

<Chromatogram>

mV

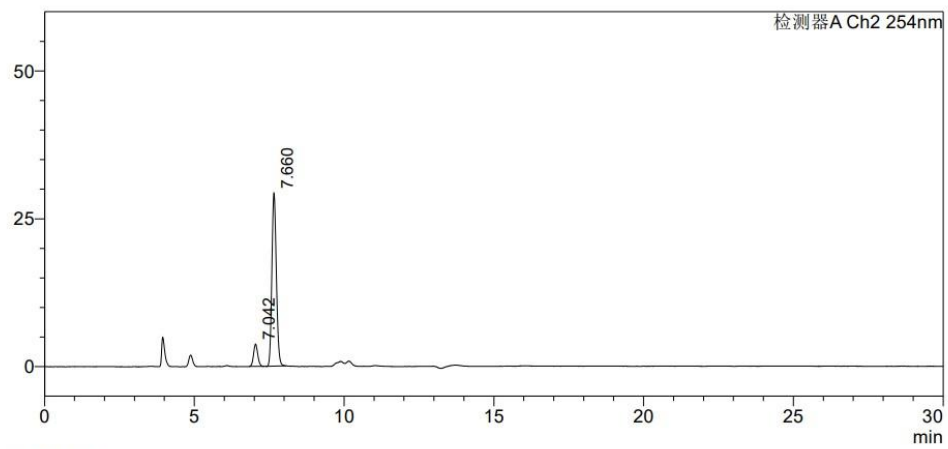

<Peak Table>

检测器A Ch2 254nm

| Peak# | Ret. Time | Area   | Height | Area%   |
|-------|-----------|--------|--------|---------|
| 1     | 7.042     | 36884  | 3765   | 10.746  |
| 2     | 7.660     | 306360 | 29203  | 89.254  |
| 总计    |           | 343244 | 32968  | 100.000 |

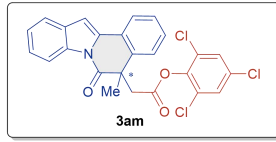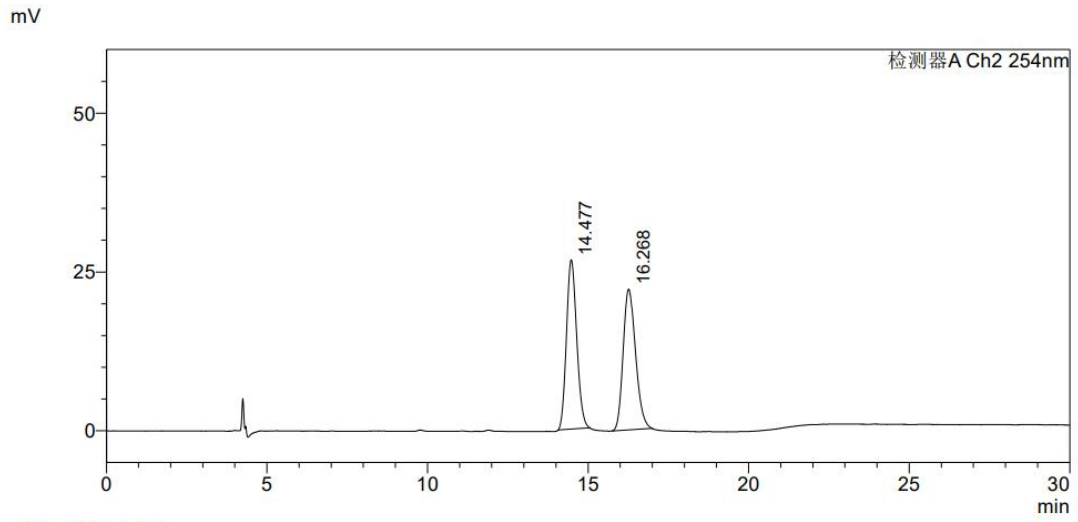

<Peak Table>

检测器A Ch2 254nm

| Peak# | Ret. Time | Area    | Height | Area%   |
|-------|-----------|---------|--------|---------|
| 1     | 14.477    | 594406  | 26638  | 50.148  |
| 2     | 16.268    | 590892  | 22142  | 49.852  |
| 总计    |           | 1185298 | 48780  | 100.000 |

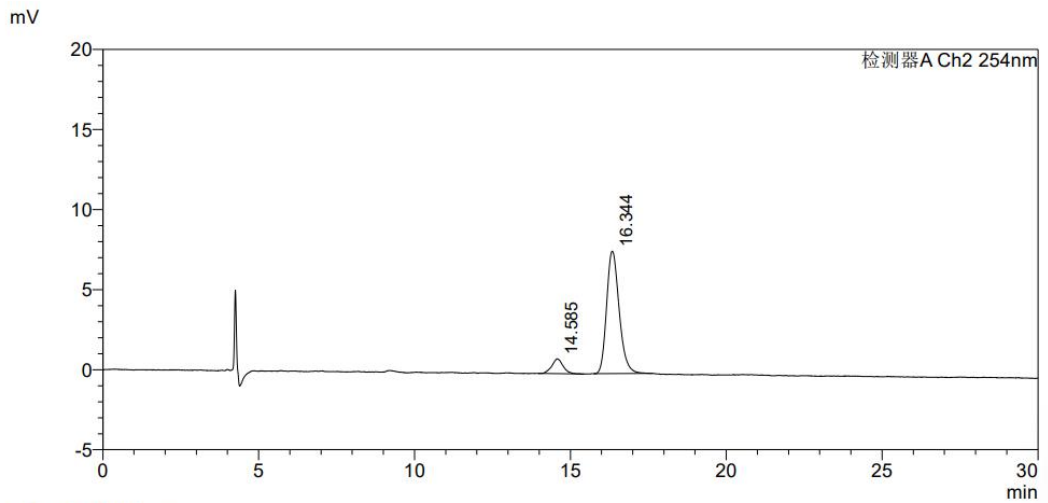

<Peak Table>

检测器A Ch2 254nm

| Peak# | Ret. Time | Area   | Height | Area%   |
|-------|-----------|--------|--------|---------|
| 1     | 14.585    | 23409  | 921    | 9.937   |
| 2     | 16.344    | 212153 | 7655   | 90.063  |
| 总计    |           | 235562 | 8576   | 100.000 |

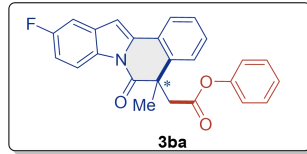

<Chromatogram>

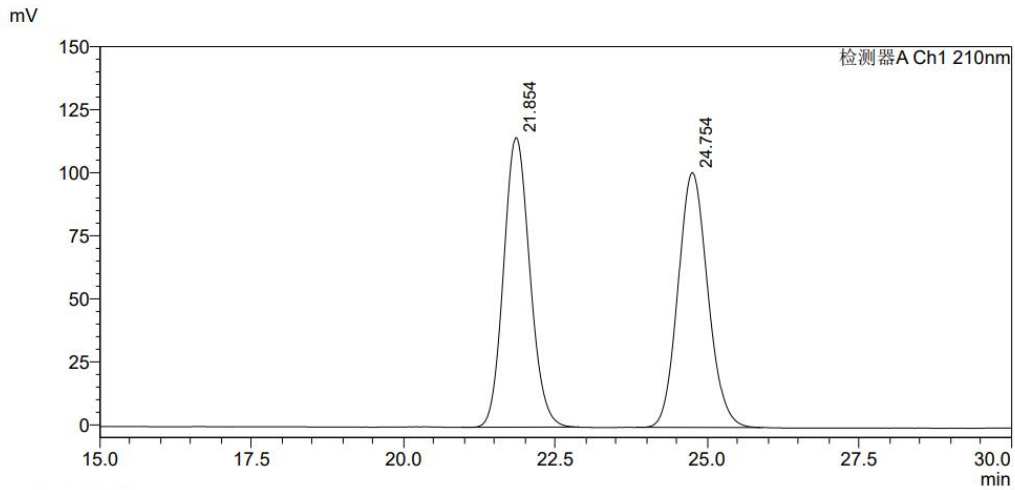

<Peak Table>

检测器A Ch1 210nm

| Peak# | Ret. Time | Area    | Height | Area%   |
|-------|-----------|---------|--------|---------|
| 1     | 21.854    | 3454113 | 114902 | 49.977  |
| 2     | 24.754    | 3457273 | 101093 | 50.023  |
| 总计    |           | 6911386 | 215995 | 100.000 |

<Chromatogram>

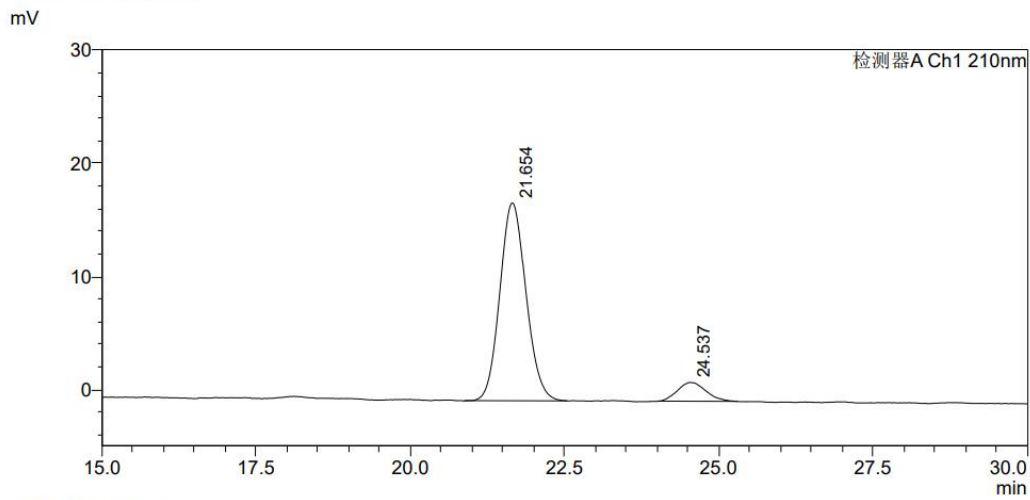

<Peak Table>

检测器A Ch1 210nm

| Peak# | Ret. Time | Area   | Height | Area%   |
|-------|-----------|--------|--------|---------|
| 1     | 21.654    | 516786 | 17473  | 90.539  |
| 2     | 24.537    | 54005  | 1672   | 9.461   |
| 总计    |           | 570792 | 19145  | 100.000 |

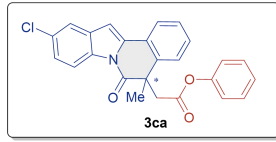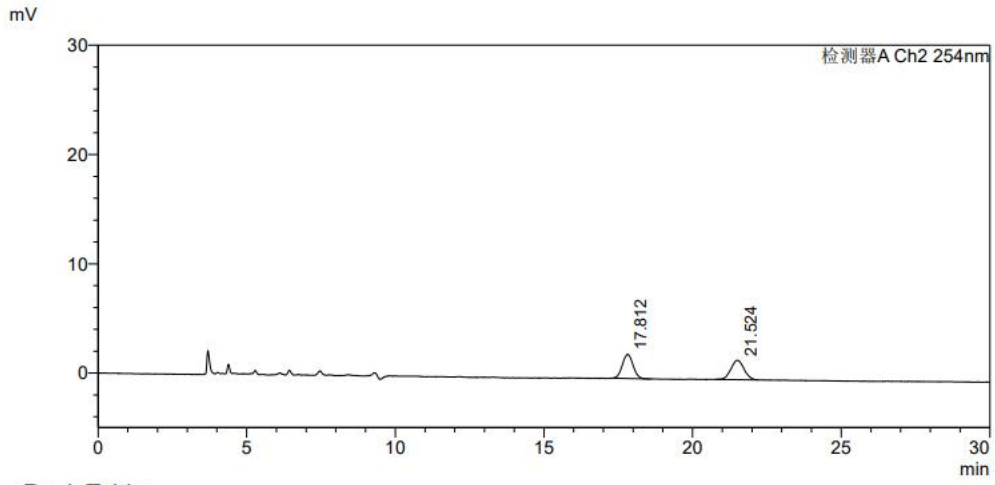

<Peak Table>

检测器A Ch2 254nm

| Peak# | Ret. Time | Area   | Height | Area%   |
|-------|-----------|--------|--------|---------|
| 1     | 17.812    | 54318  | 2204   | 50.118  |
| 2     | 21.524    | 54062  | 1770   | 49.882  |
| 总计    |           | 108380 | 3974   | 100.000 |

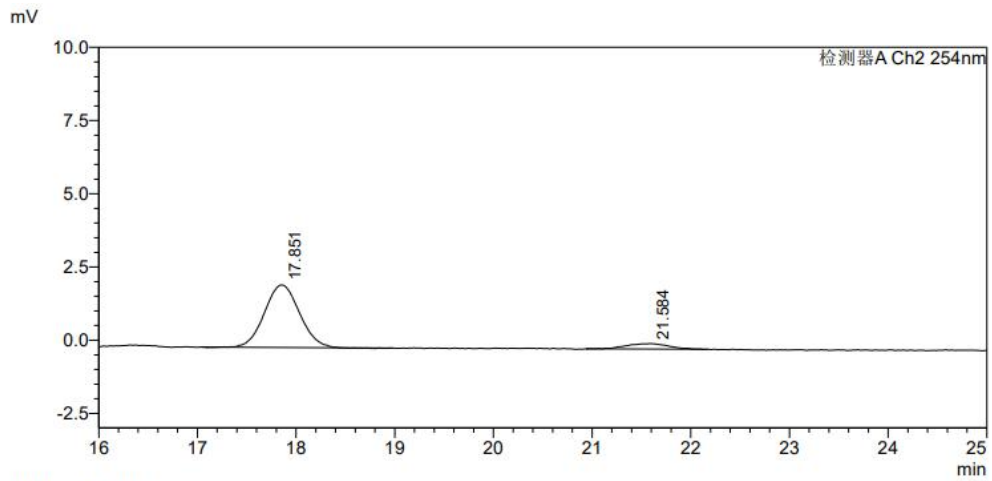

<Peak Table>

检测器A Ch2 254nm

| Peak# | Ret. Time | Area  | Height | Area%   |
|-------|-----------|-------|--------|---------|
| 1     | 17.851    | 52366 | 2132   | 90.362  |
| 2     | 21.584    | 5586  | 191    | 9.638   |
| 总计    |           | 57951 | 2323   | 100.000 |

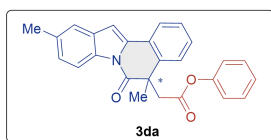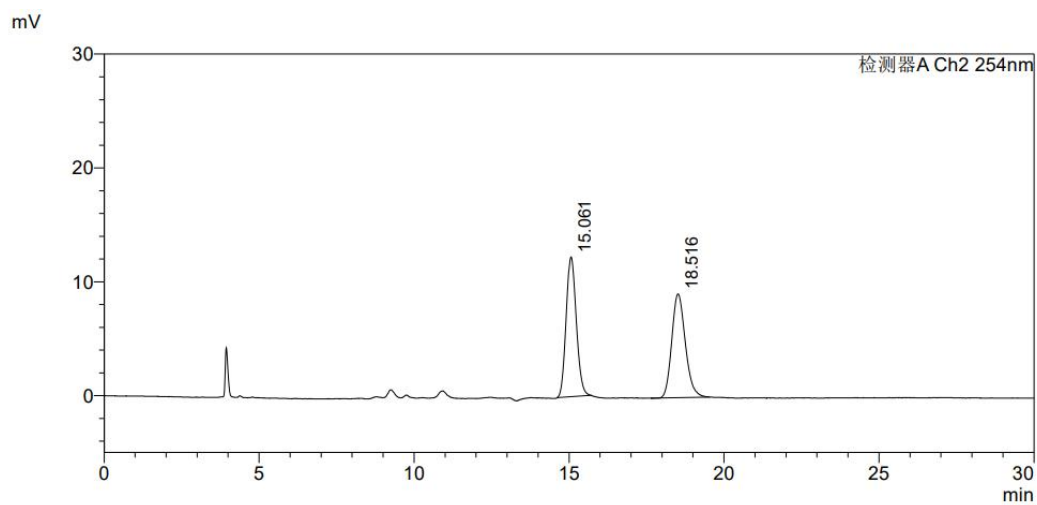

<Peak Table>

检测器A Ch2 254nm

| Peak# | Ret. Time | Area   | Height | Area%   |
|-------|-----------|--------|--------|---------|
| 1     | 15.061    | 277374 | 12277  | 49.982  |
| 2     | 18.516    | 277574 | 9108   | 50.018  |
| 总计    |           | 554948 | 21385  | 100.000 |

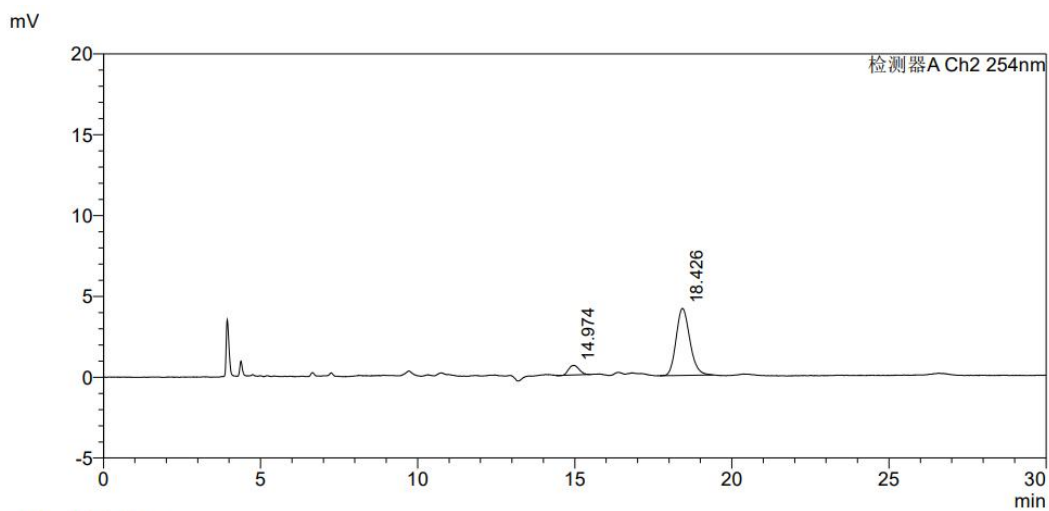

<Peak Table>

检测器A Ch2 254nm

| Peak# | Ret. Time | Area   | Height | Area%   |
|-------|-----------|--------|--------|---------|
| 1     | 14.974    | 13612  | 594    | 9.724   |
| 2     | 18.426    | 126374 | 4145   | 90.276  |
| 总计    |           | 139987 | 4739   | 100.000 |

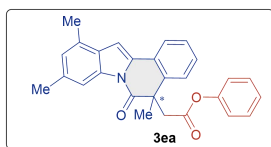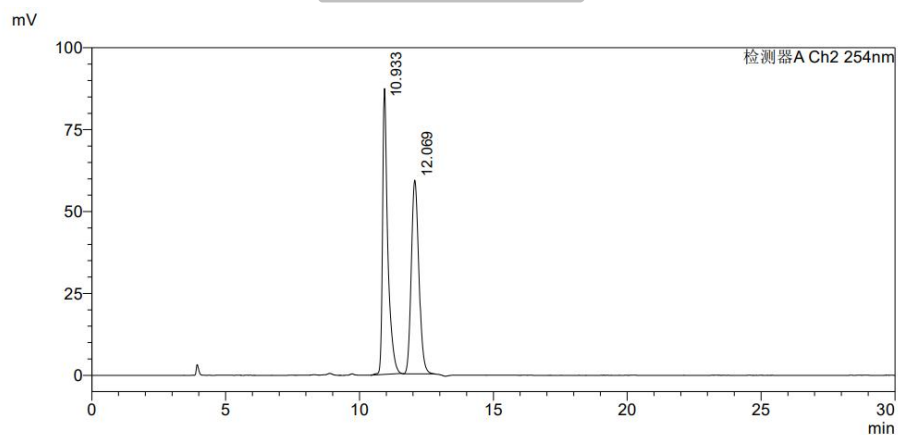

<Peak Table>

| 检测器A Ch2 254nm |           |         |        |         |
|----------------|-----------|---------|--------|---------|
| Peak#          | Ret. Time | Area    | Height | Area%   |
| 1              | 10.933    | 1152452 | 87352  | 49.789  |
| 2              | 12.069    | 1162205 | 59110  | 50.211  |
| 总计             |           | 2314657 | 146462 | 100.000 |

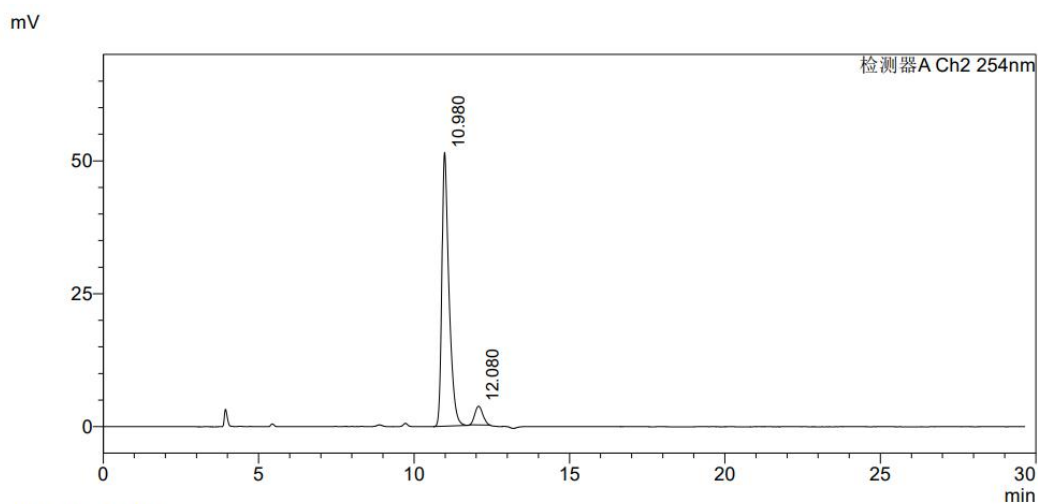

<Peak Table>

| 检测器A Ch2 254nm |           |        |        |         |
|----------------|-----------|--------|--------|---------|
| Peak#          | Ret. Time | Area   | Height | Area%   |
| 1              | 10.980    | 805829 | 51410  | 92.770  |
| 2              | 12.080    | 62799  | 3511   | 7.230   |
| 总计             |           | 868629 | 54921  | 100.000 |



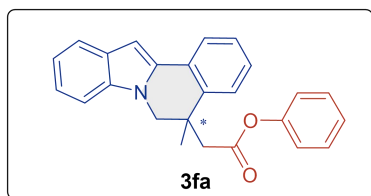

<Chromatogram>

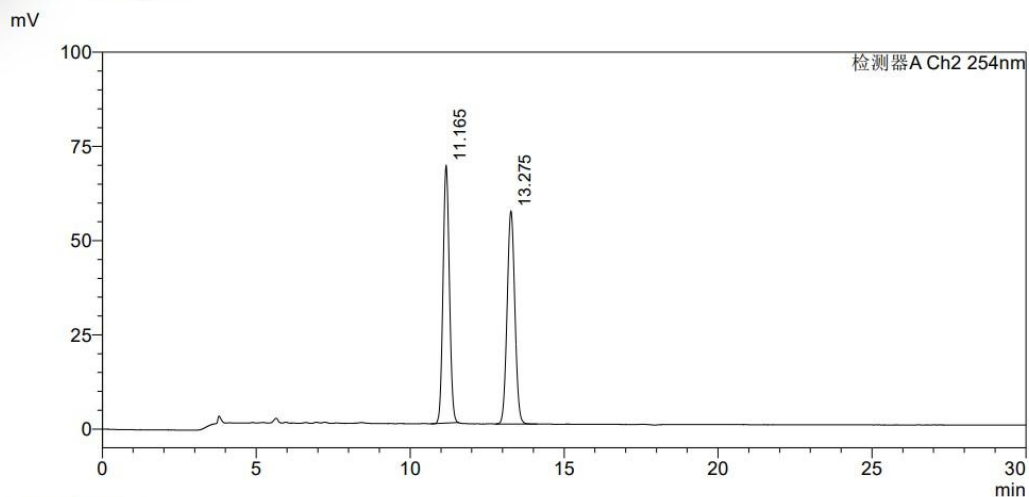

<Peak Table>

检测器A Ch2 254nm

| Peak# | Ret. Time | Area    | Height | Area%   |
|-------|-----------|---------|--------|---------|
| 1     | 11.165    | 985522  | 68242  | 49.782  |
| 2     | 13.275    | 994154  | 56544  | 50.218  |
| 总计    |           | 1979676 | 124785 | 100.000 |

<Chromatogram>

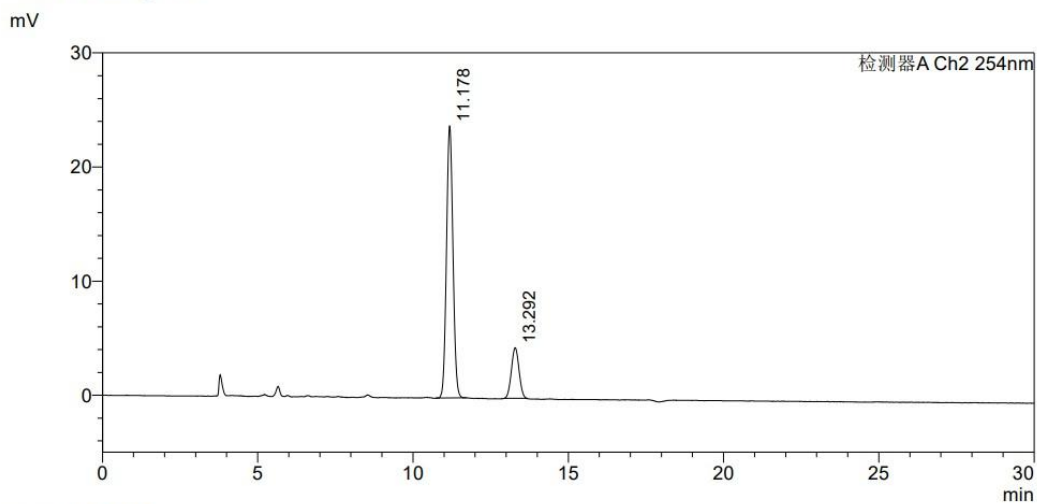

<Peak Table>

检测器A Ch2 254nm

| Peak# | Ret. Time | Area   | Height | Area%   |
|-------|-----------|--------|--------|---------|
| 1     | 11.178    | 346274 | 23839  | 81.968  |
| 2     | 13.292    | 76179  | 4430   | 18.032  |
| 总计    |           | 422452 | 28270  | 100.000 |

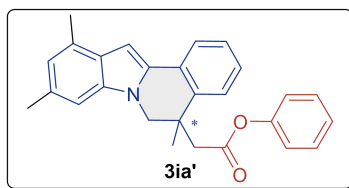

<Chromatogram>

mV

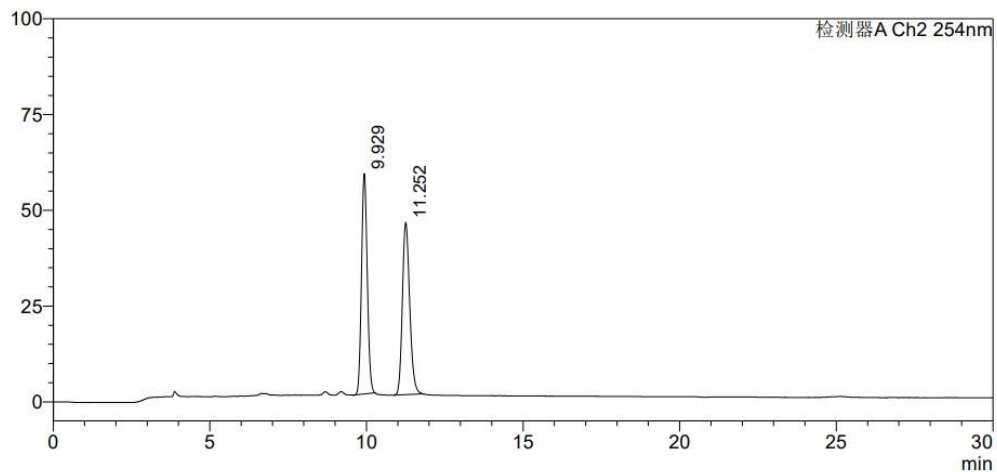

<Peak Table>

检测器A Ch2 254nm

| Peak# | Ret. Time | Area    | Height | Area%   |
|-------|-----------|---------|--------|---------|
| 1     | 9.929     | 737519  | 57505  | 50.165  |
| 2     | 11.252    | 732677  | 44928  | 49.835  |
| 总计    |           | 1470196 | 102433 | 100.000 |

<Chromatogram>

mV

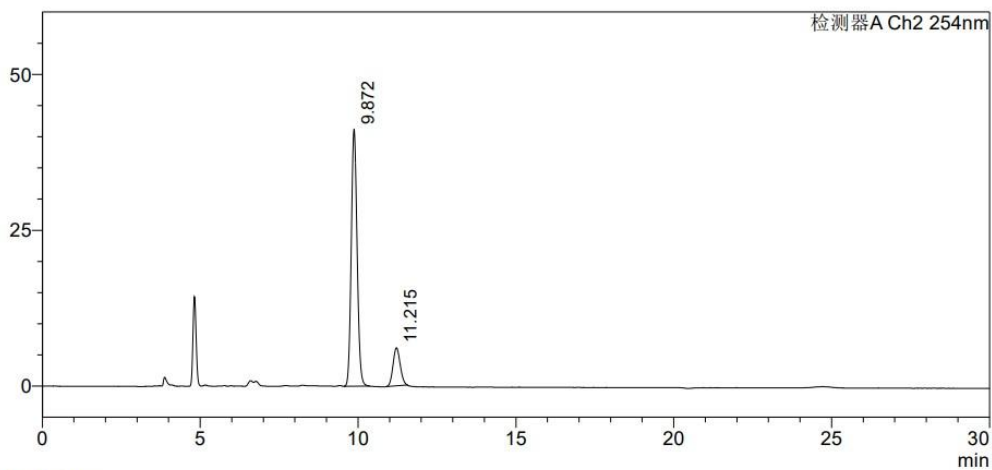

<Peak Table>

检测器A Ch2 254nm

| Peak# | Ret. Time | Area   | Height | Area%   |
|-------|-----------|--------|--------|---------|
| 1     | 9.872     | 532672 | 41191  | 84.711  |
| 2     | 11.215    | 96142  | 6089   | 15.289  |
| 总计    |           | 628813 | 47279  | 100.000 |

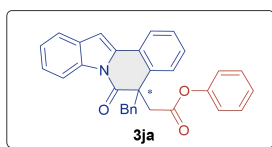

mV

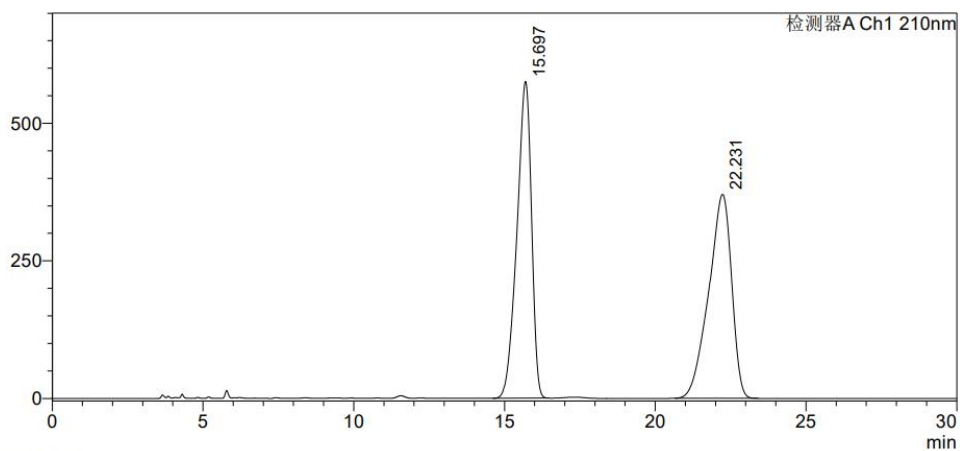

<Peak Table>

检测器A Ch1 210nm

| Peak# | Ret. Time | Area     | Height | Area%   |
|-------|-----------|----------|--------|---------|
| 1     | 15.697    | 19475083 | 575757 | 49.818  |
| 2     | 22.231    | 19617234 | 370721 | 50.182  |
| 总计    |           | 39092317 | 946478 | 100.000 |

mV

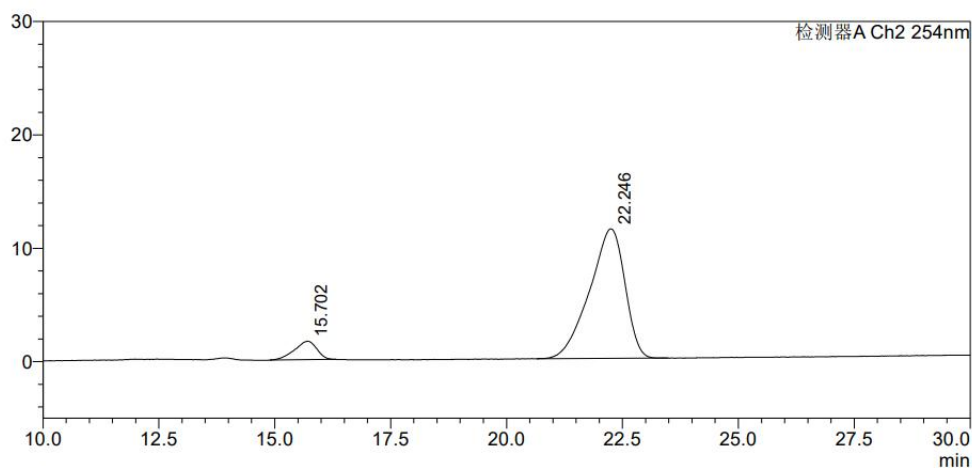

<Peak Table>

检测器A Ch2 254nm

| Peak# | Ret. Time | Area   | Height | Area%   |
|-------|-----------|--------|--------|---------|
| 1     | 15.702    | 54705  | 1630   | 8.291   |
| 2     | 22.246    | 605122 | 11423  | 91.709  |
| 总计    |           | 659827 | 13053  | 100.000 |

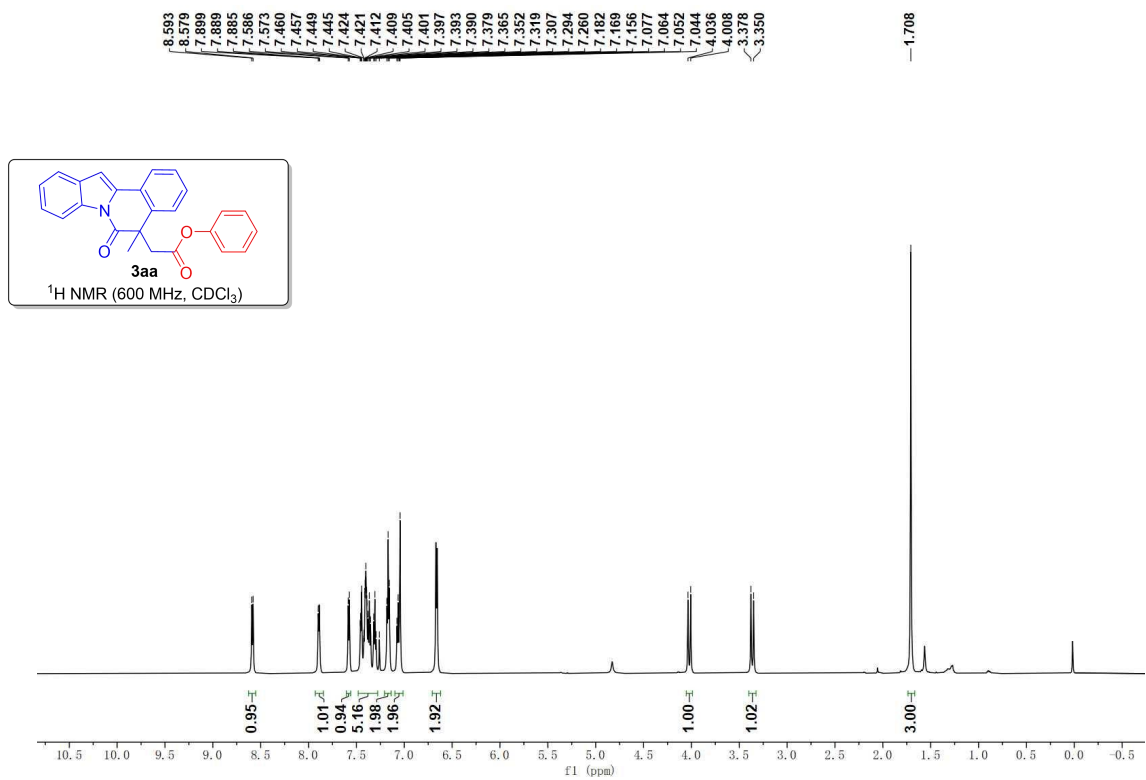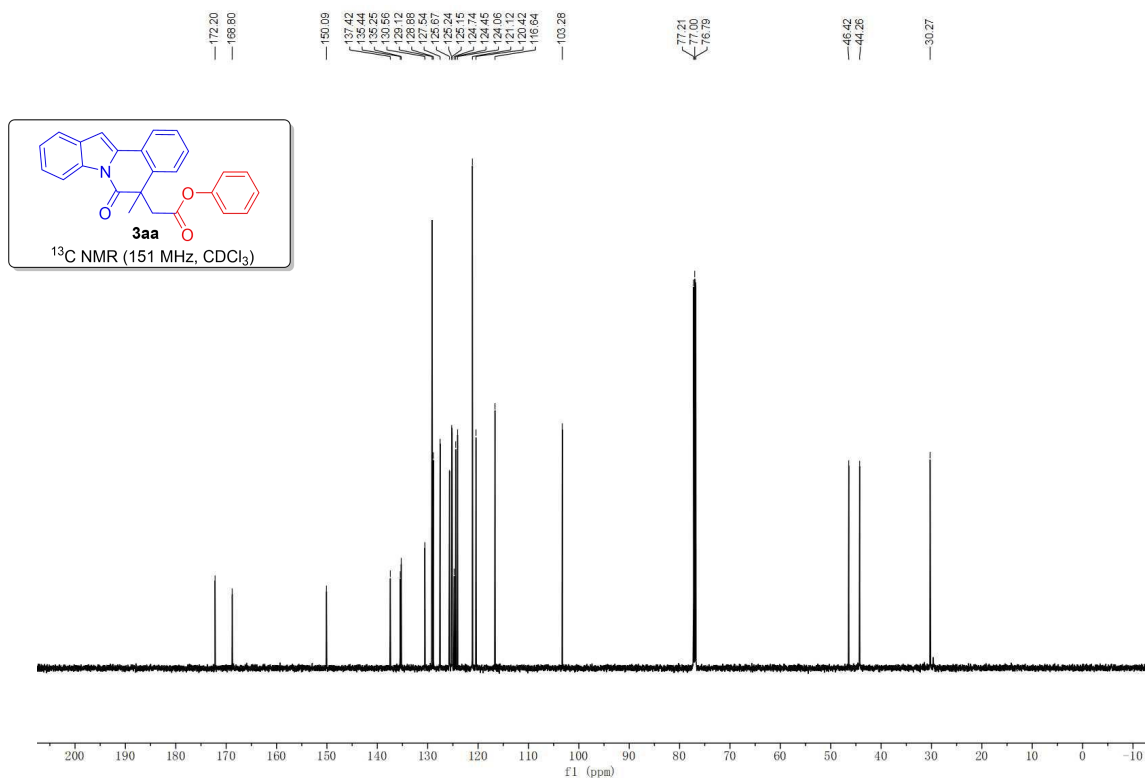

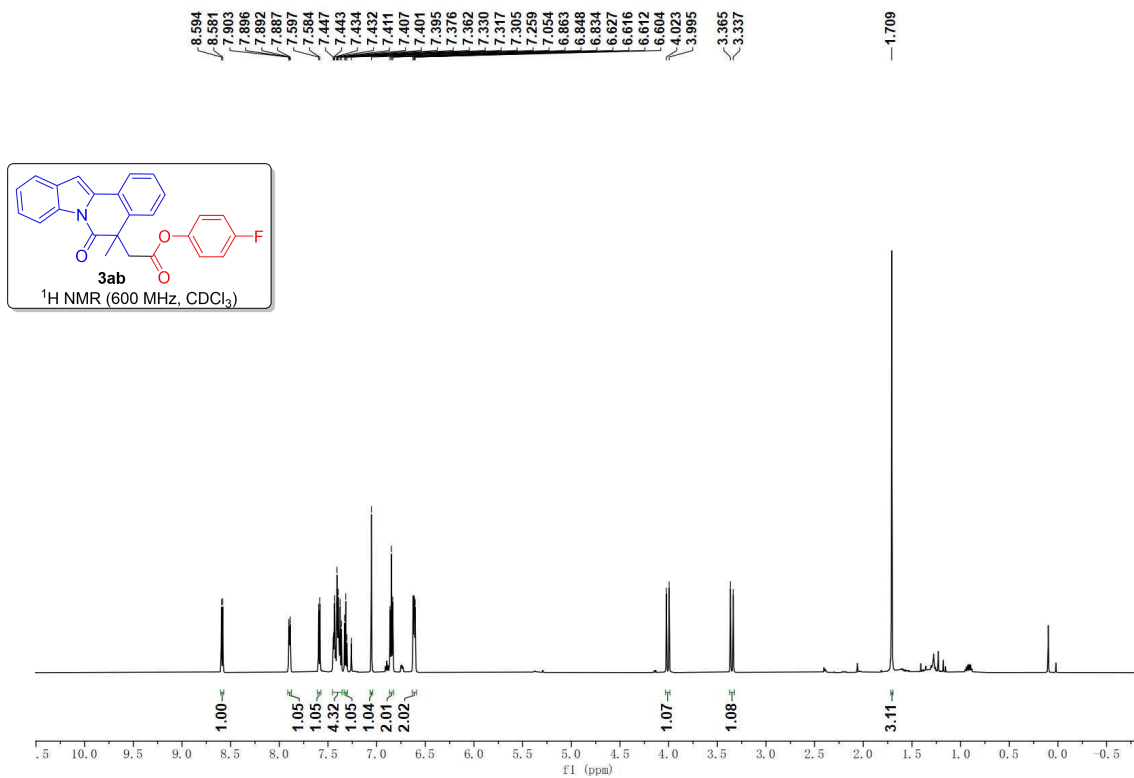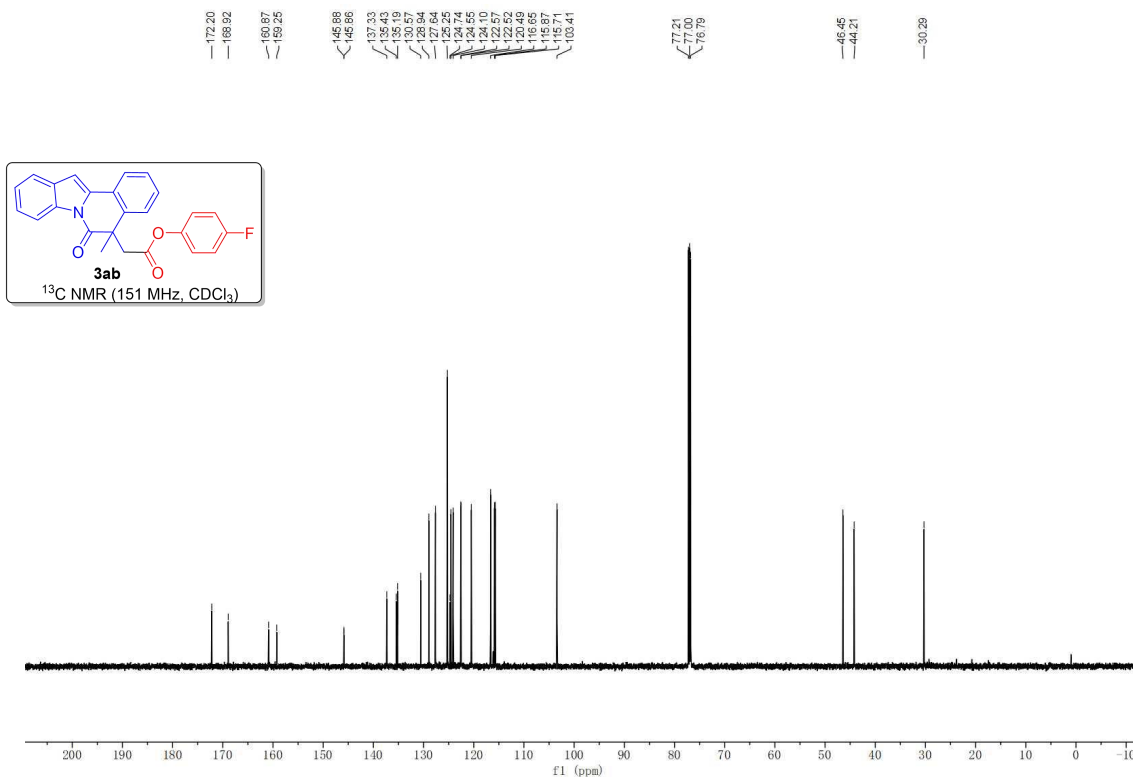

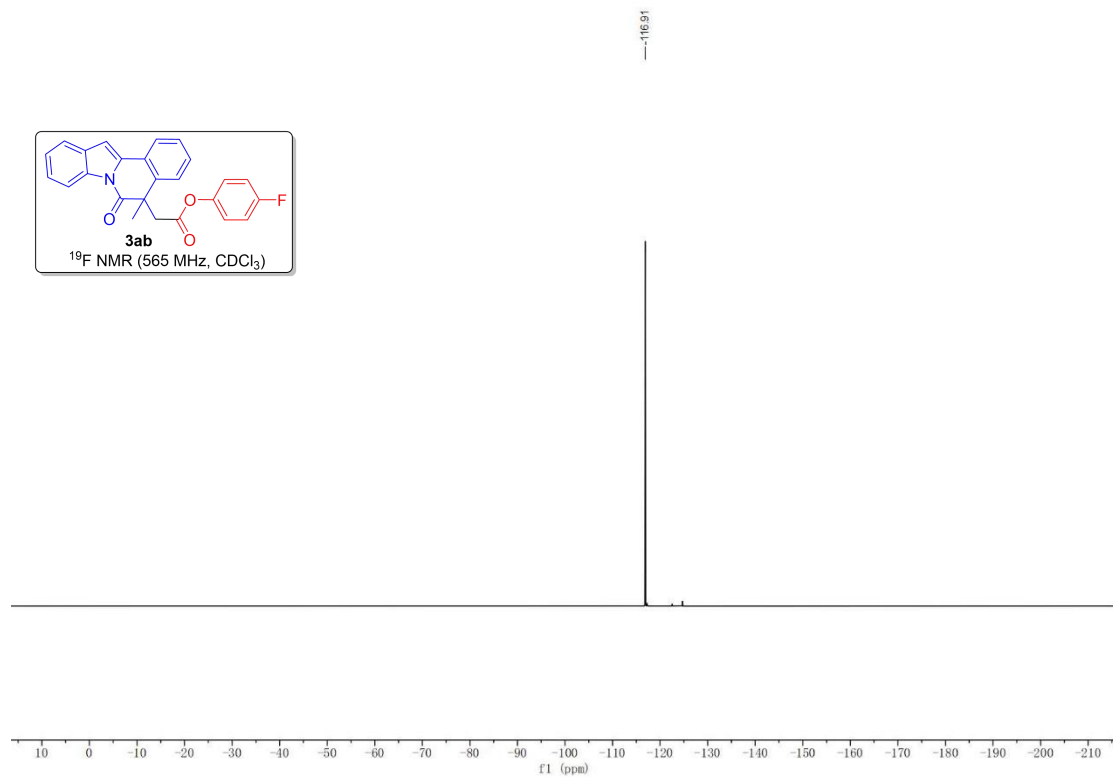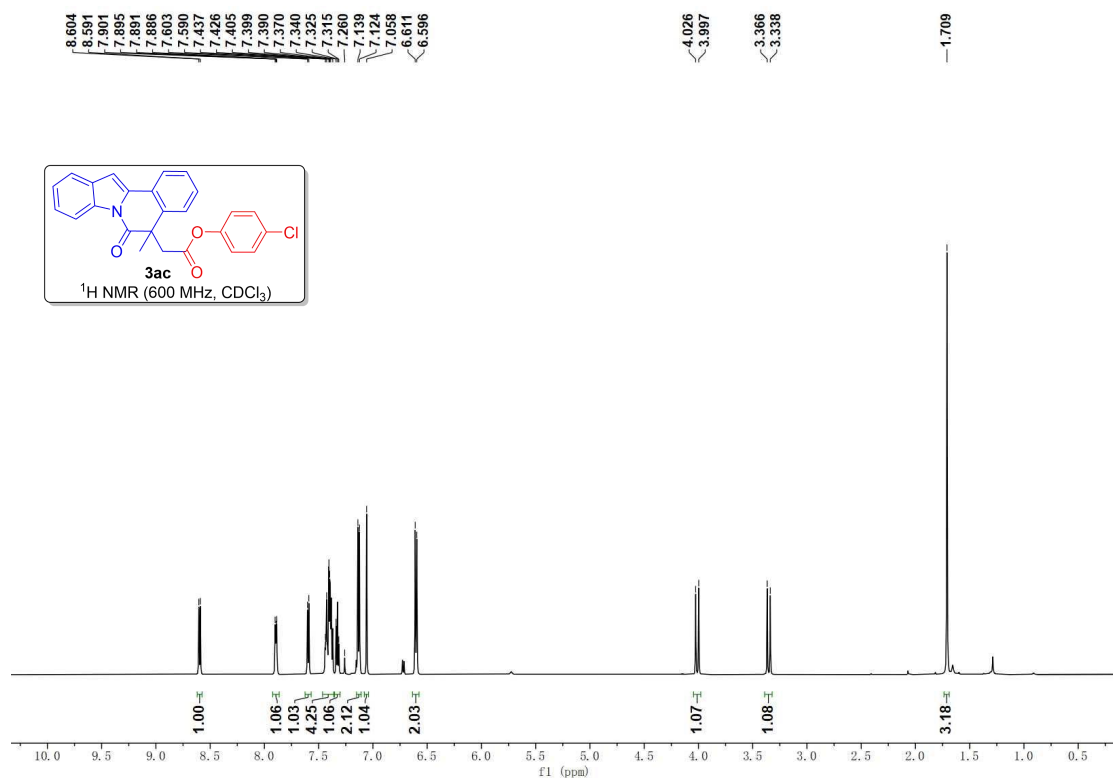

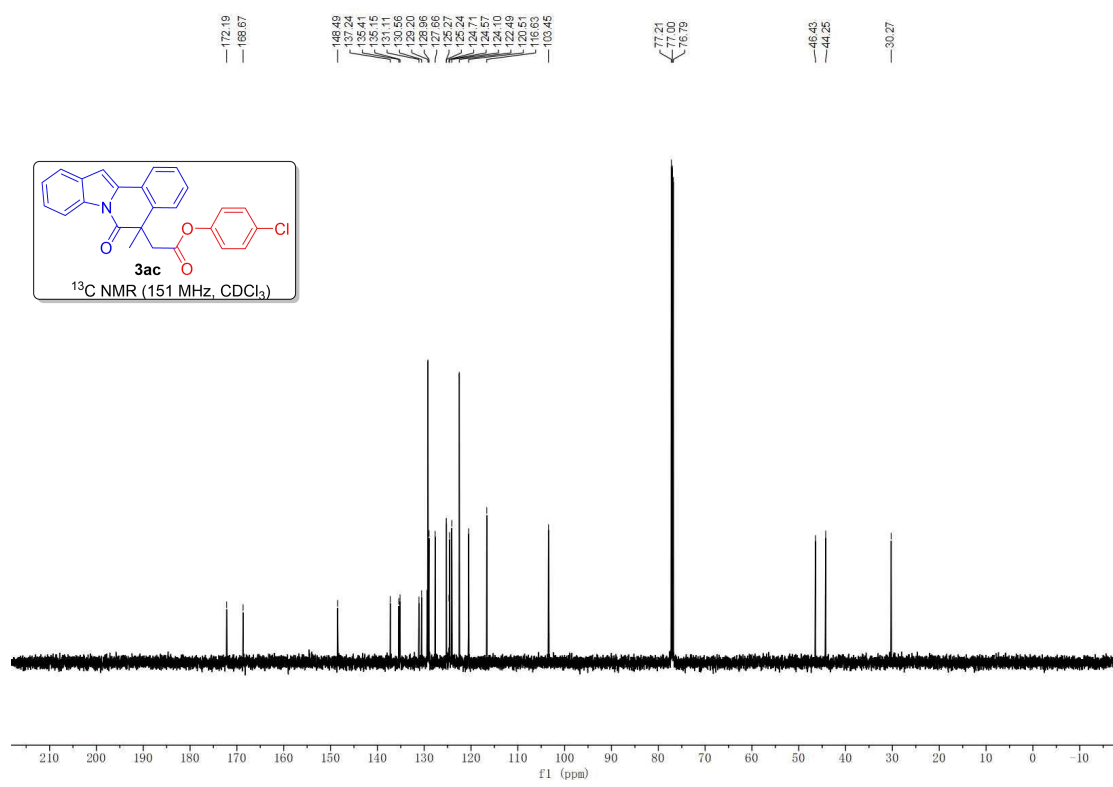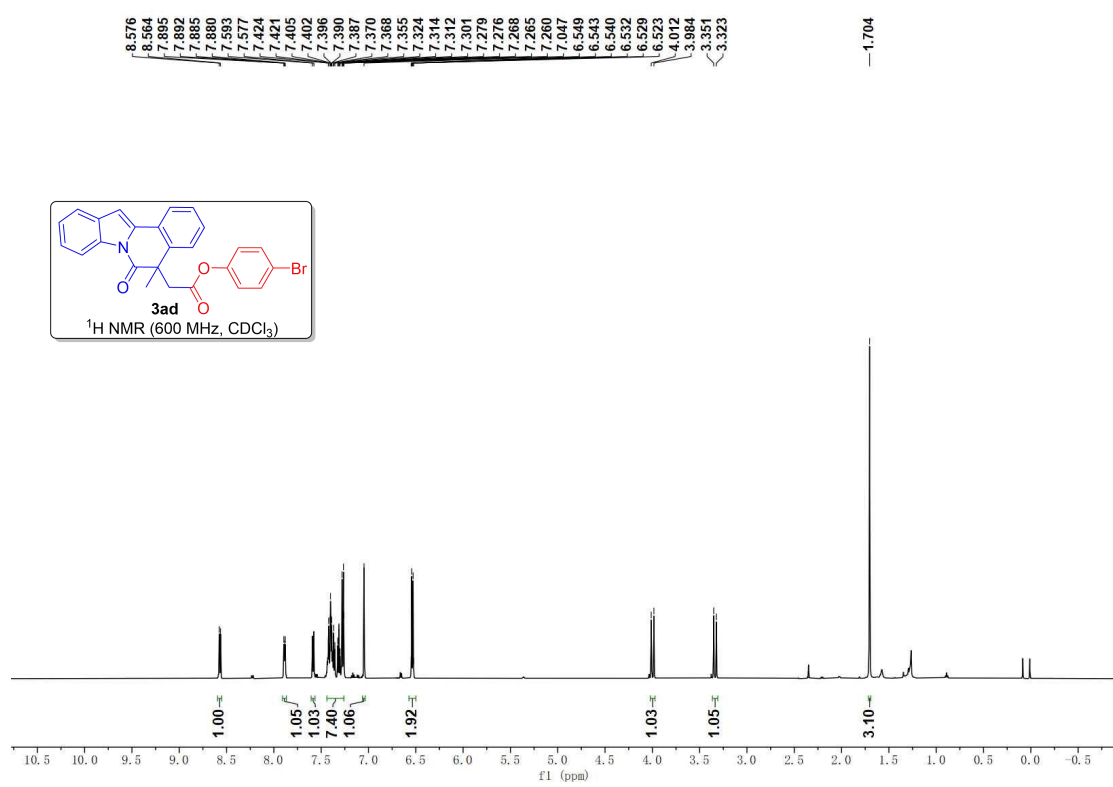

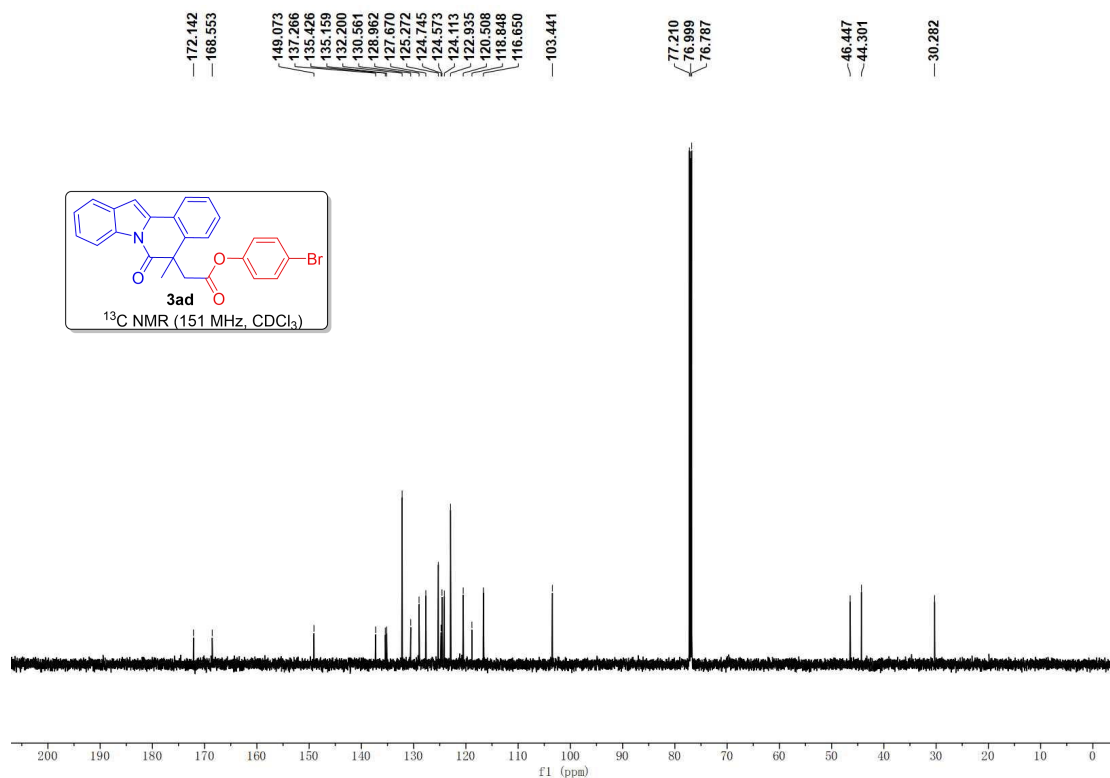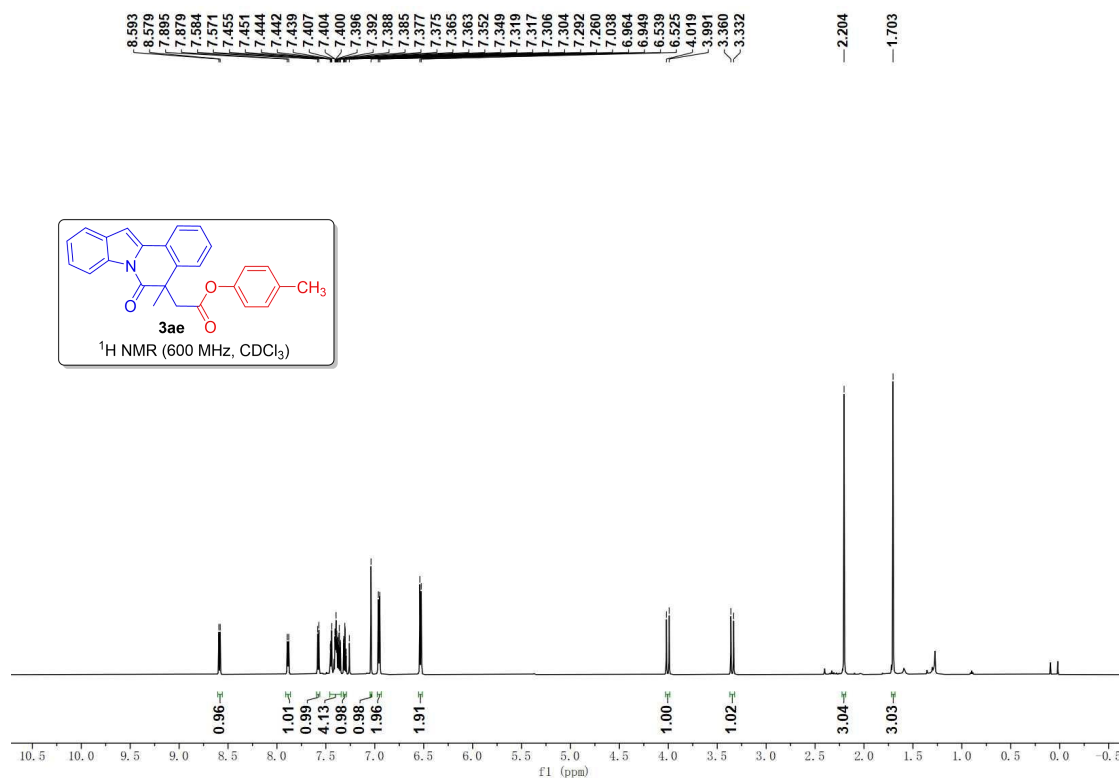



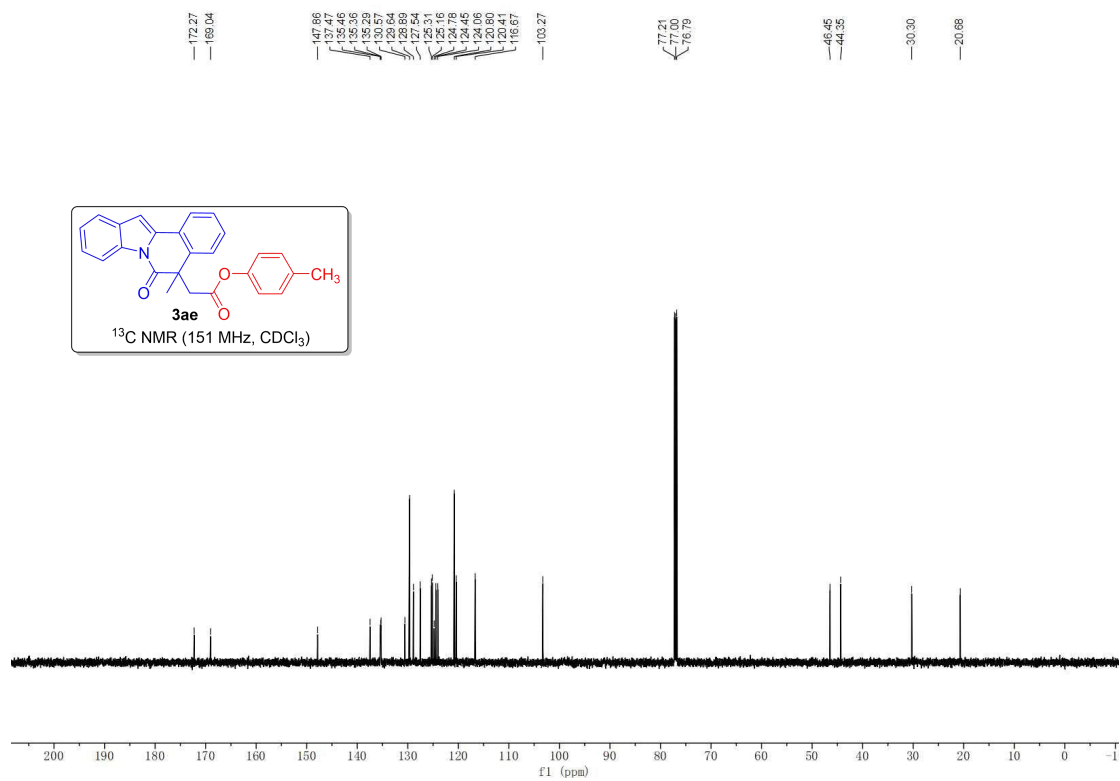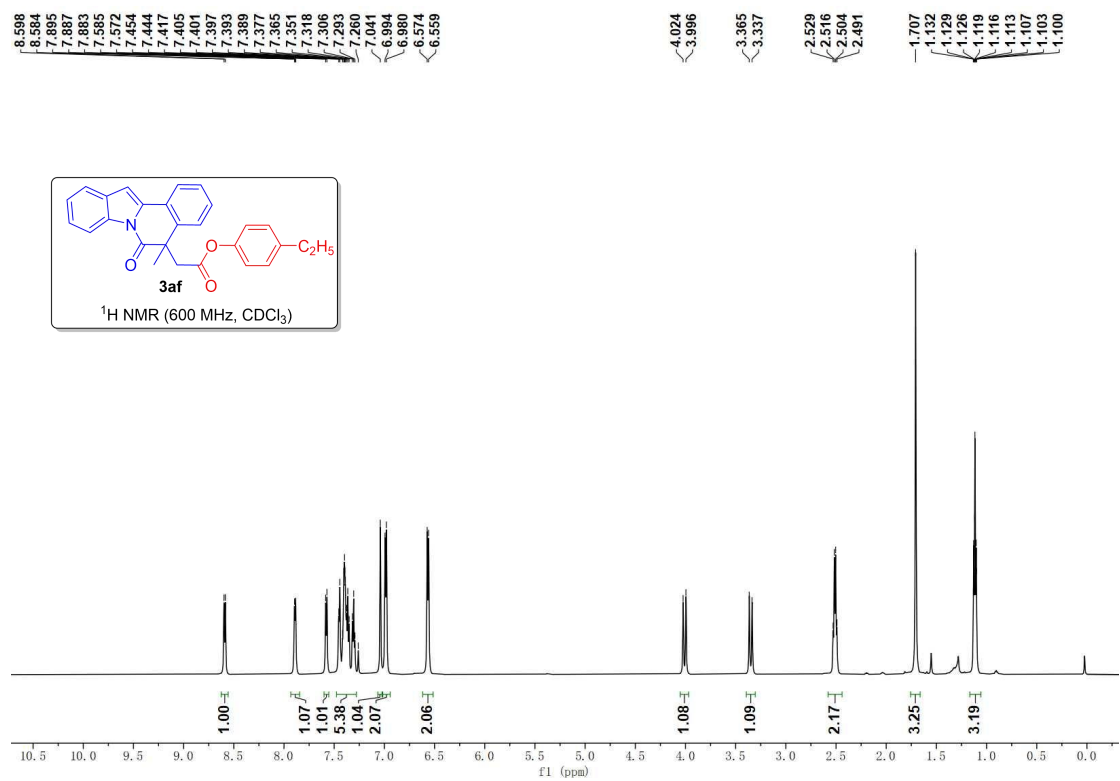

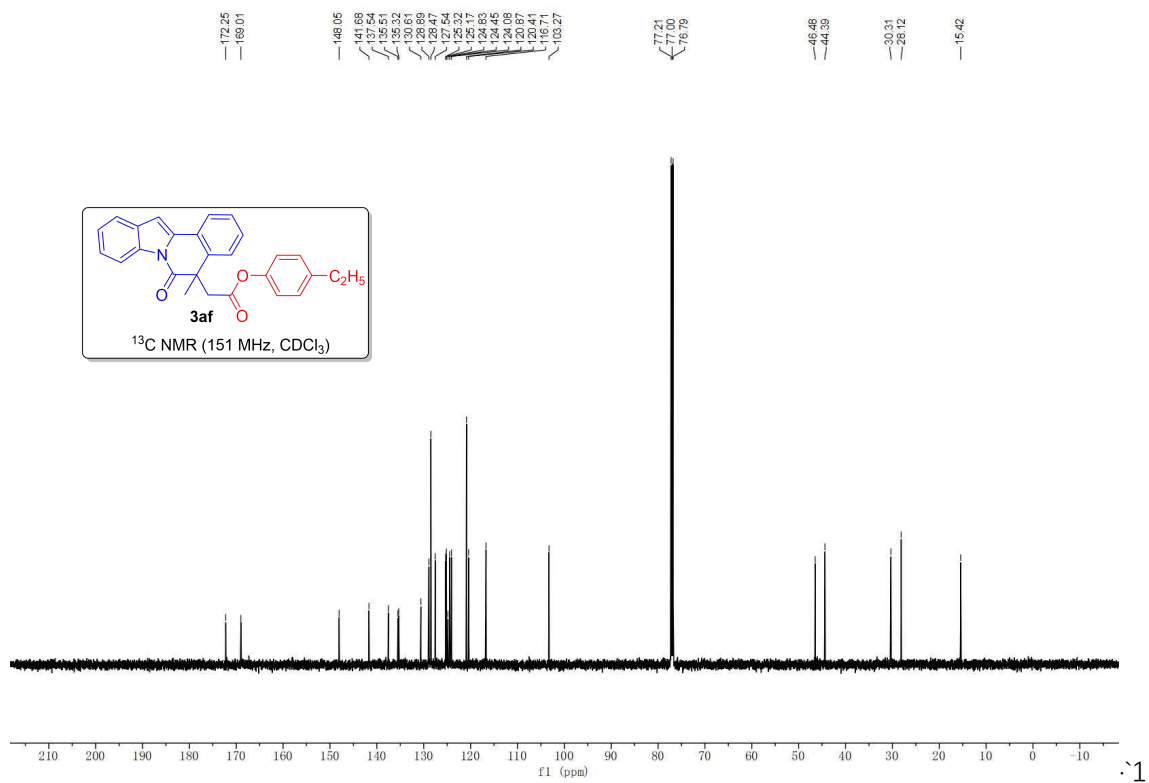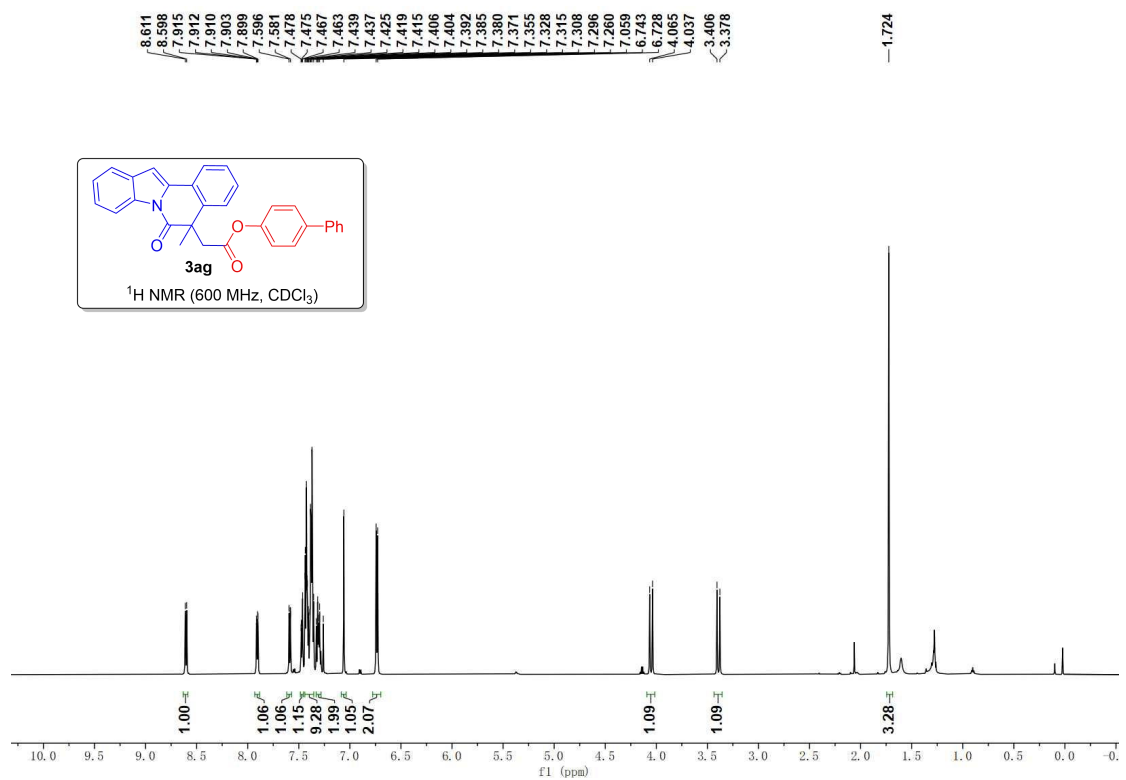

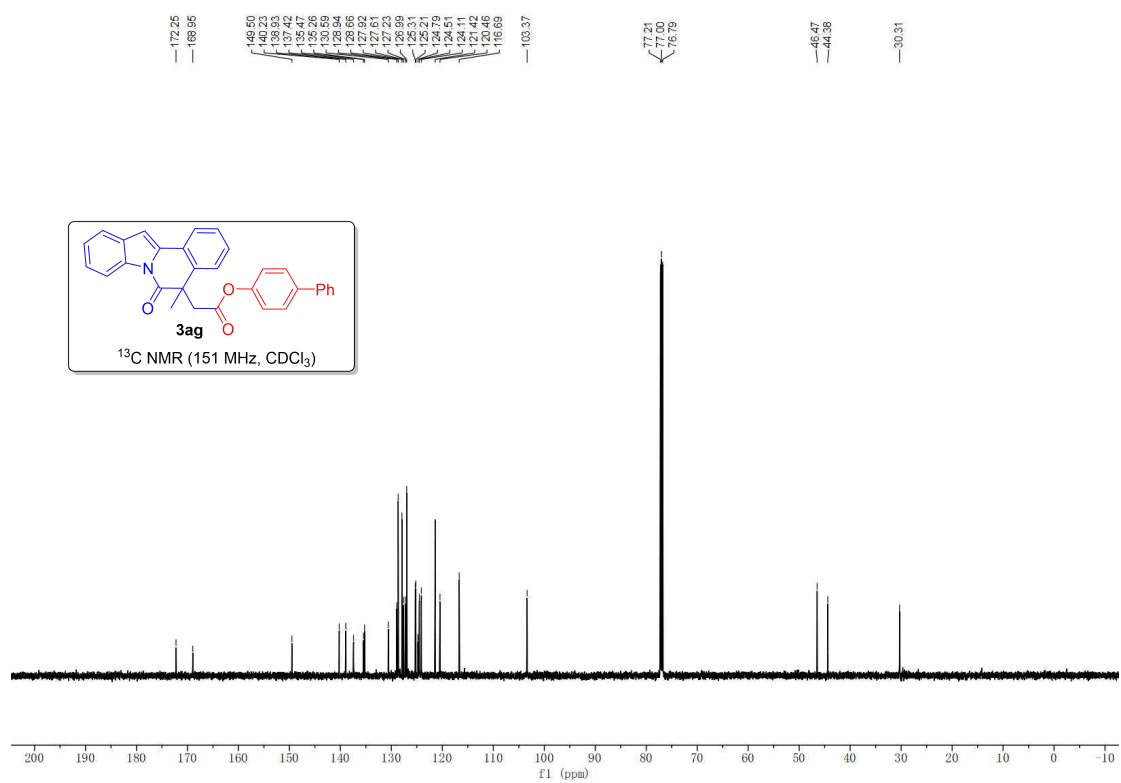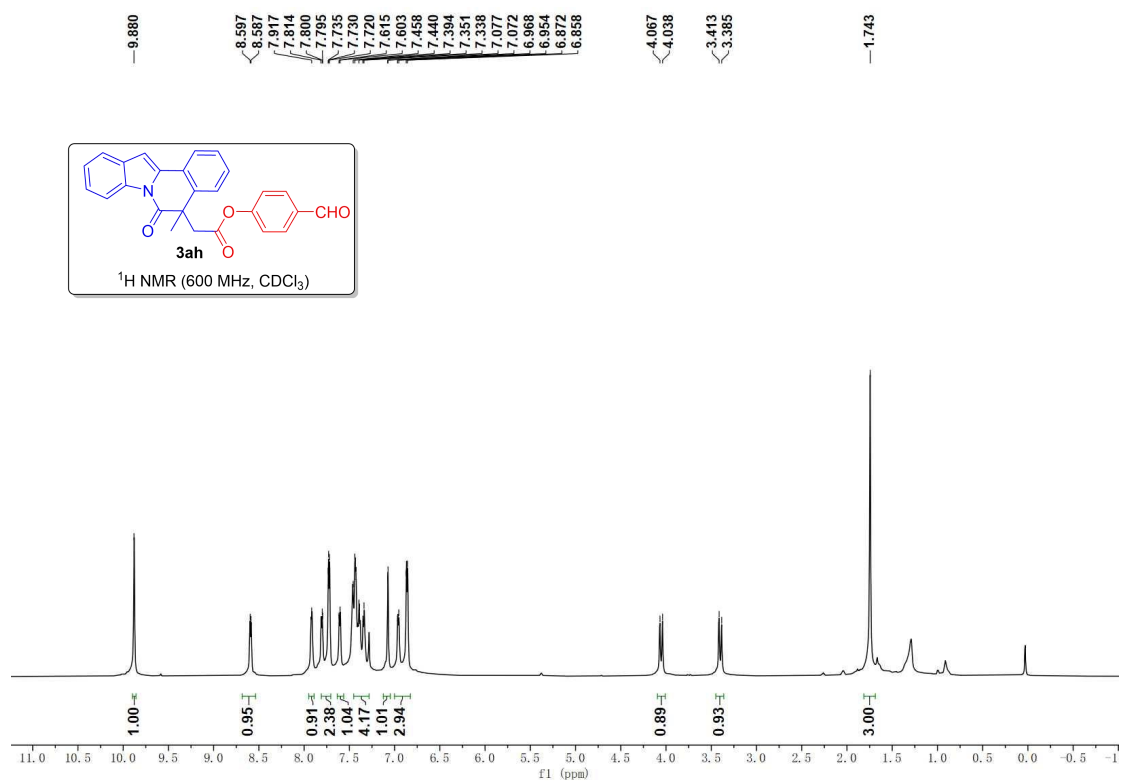

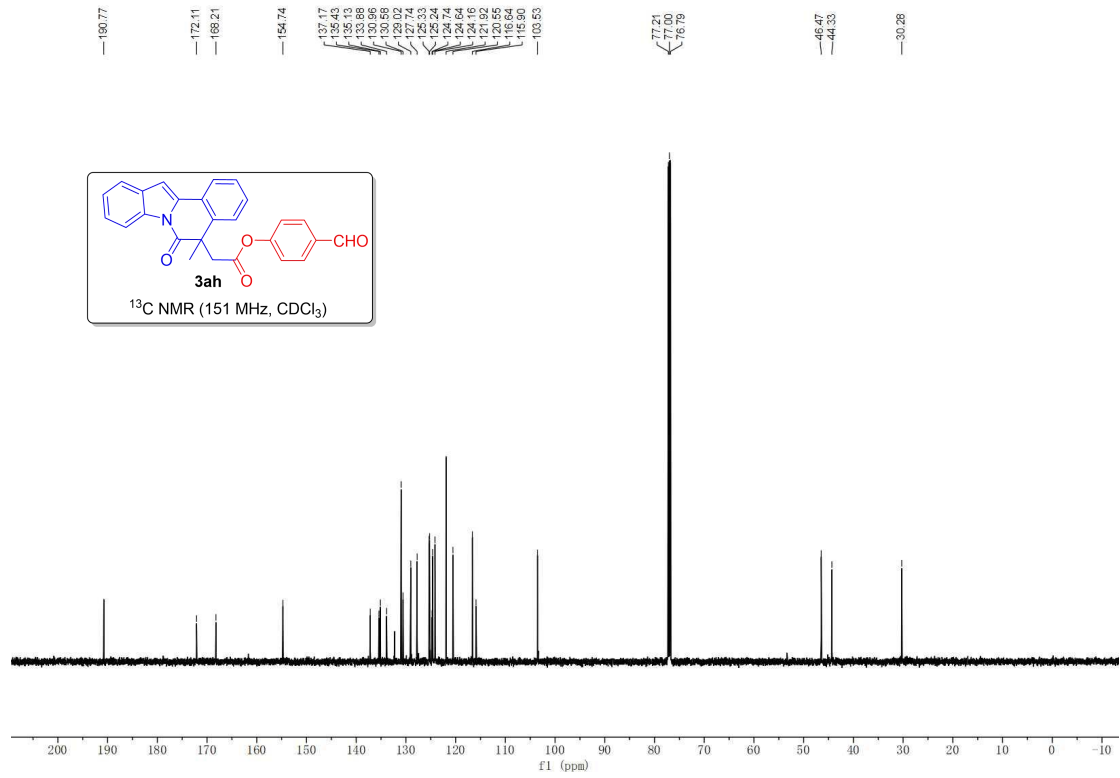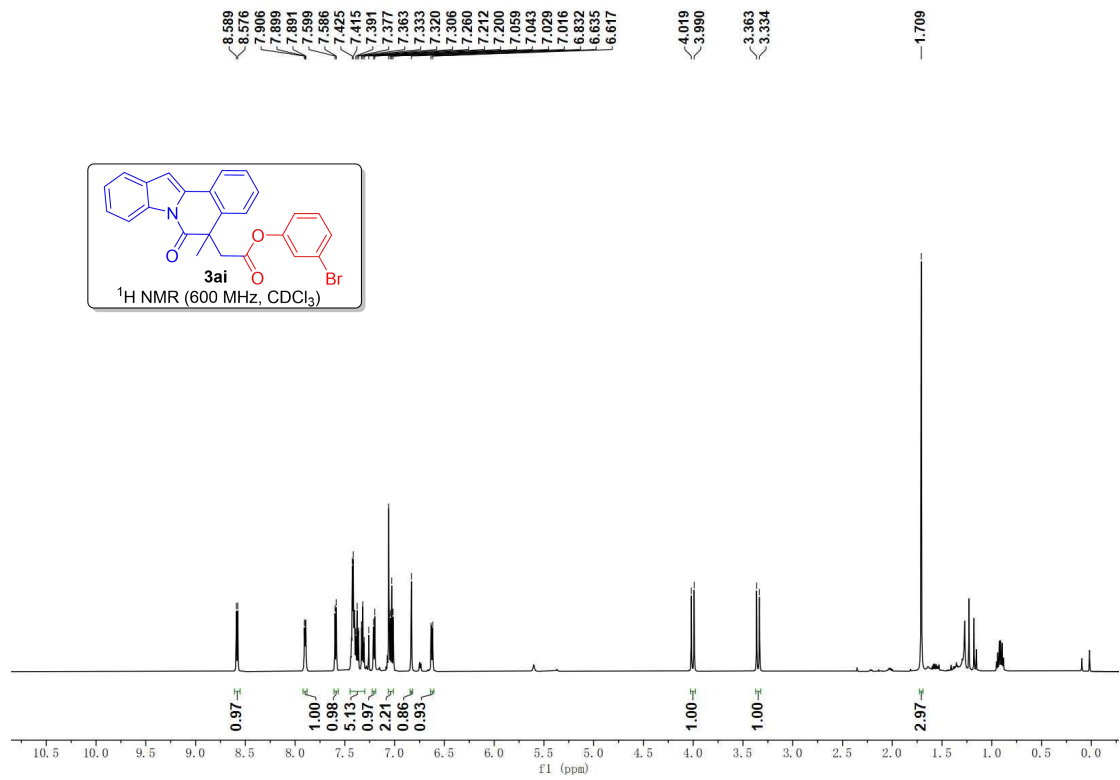

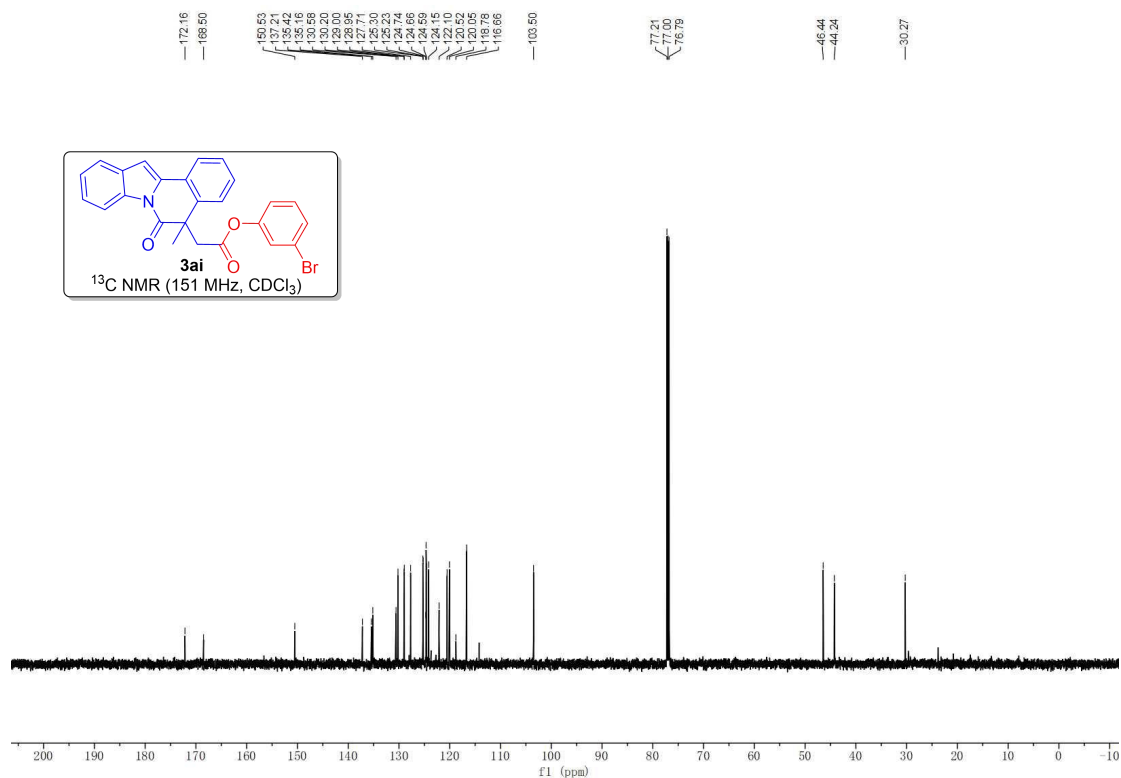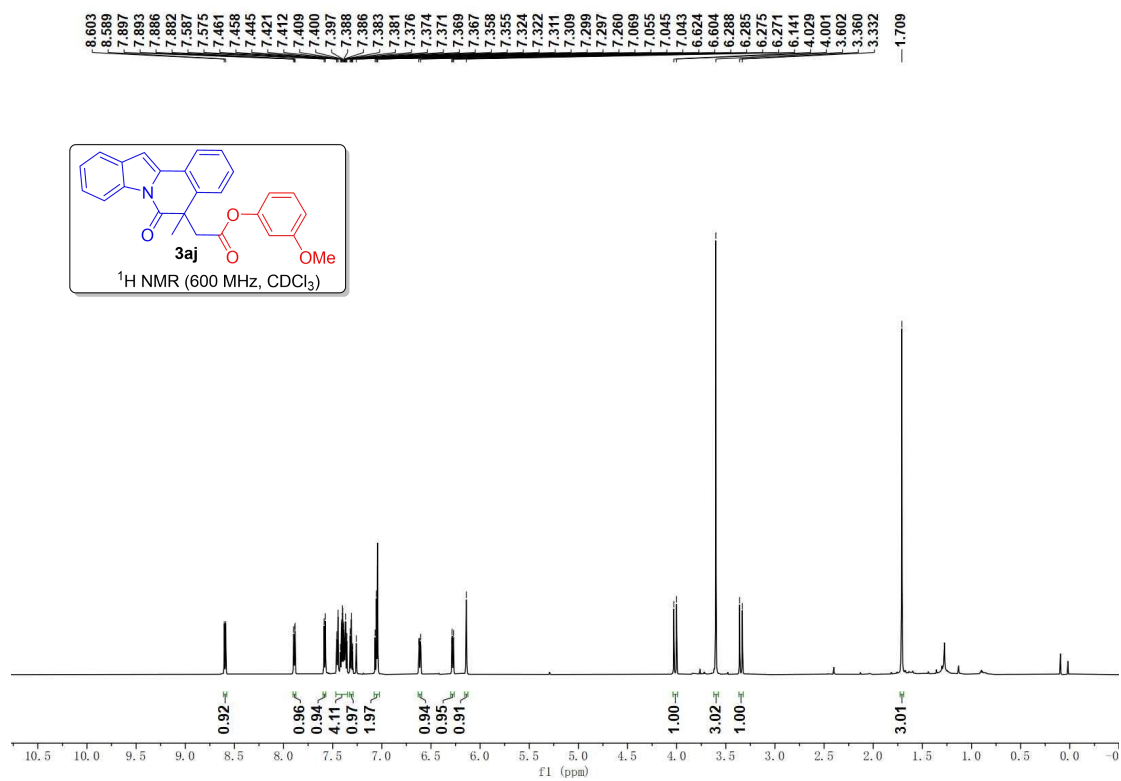

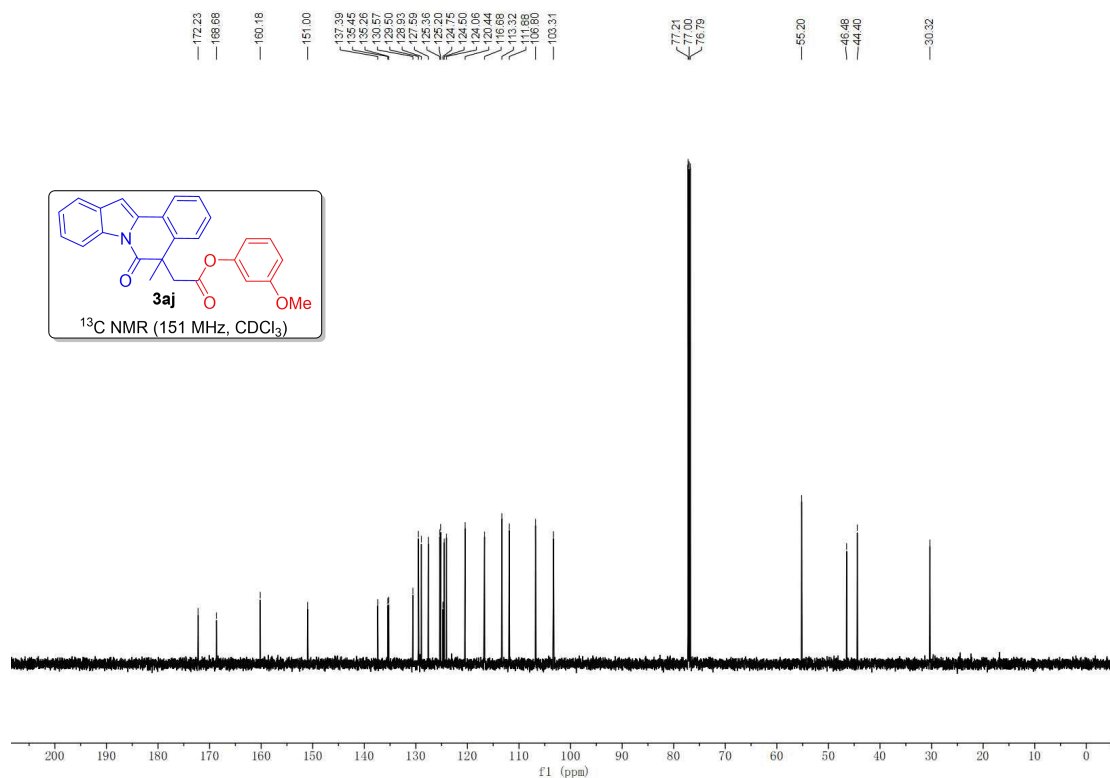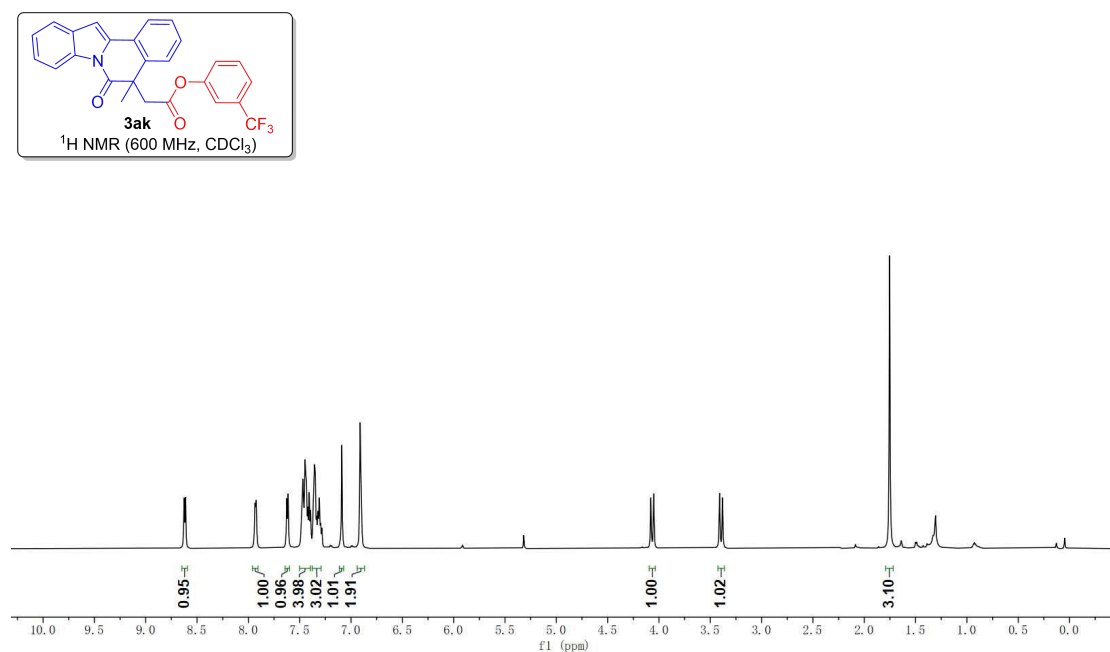

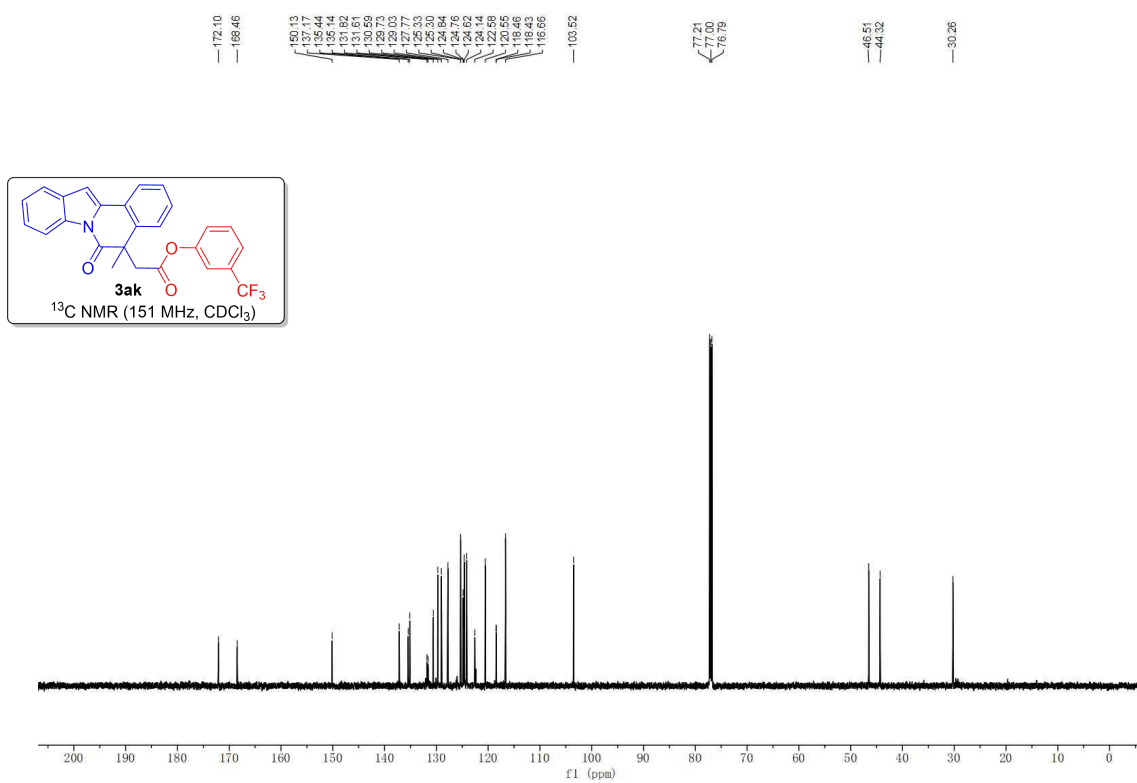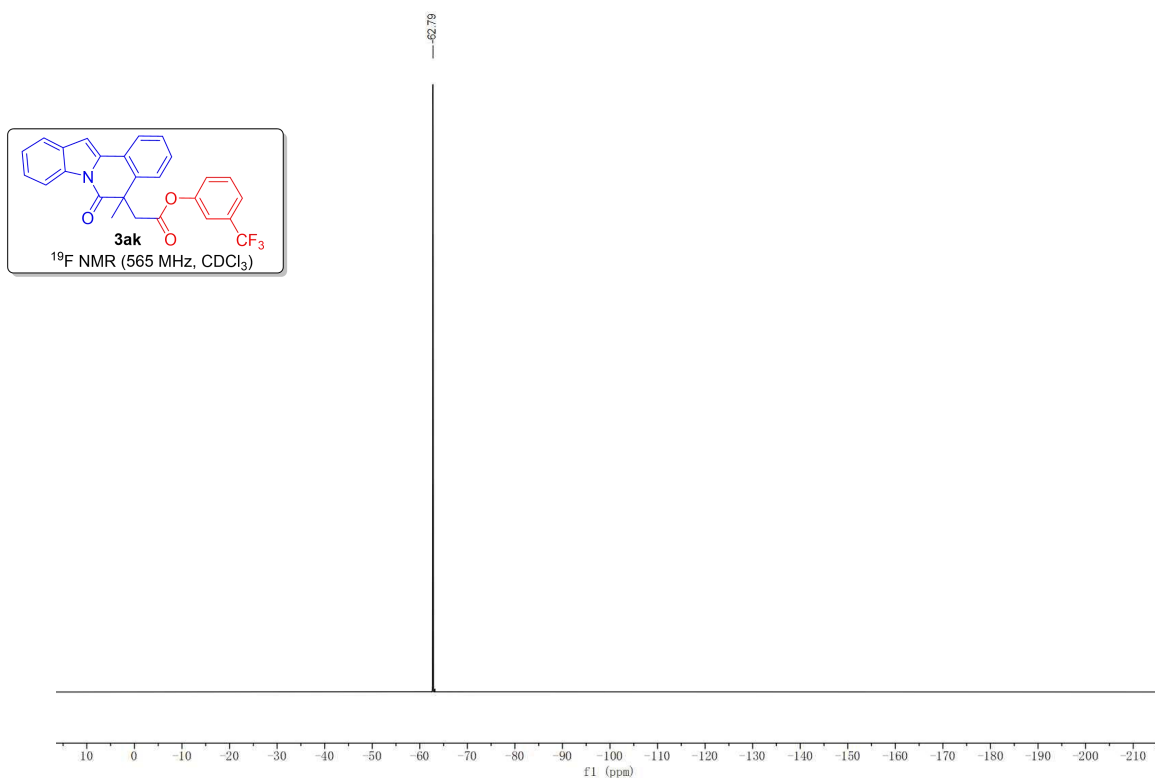

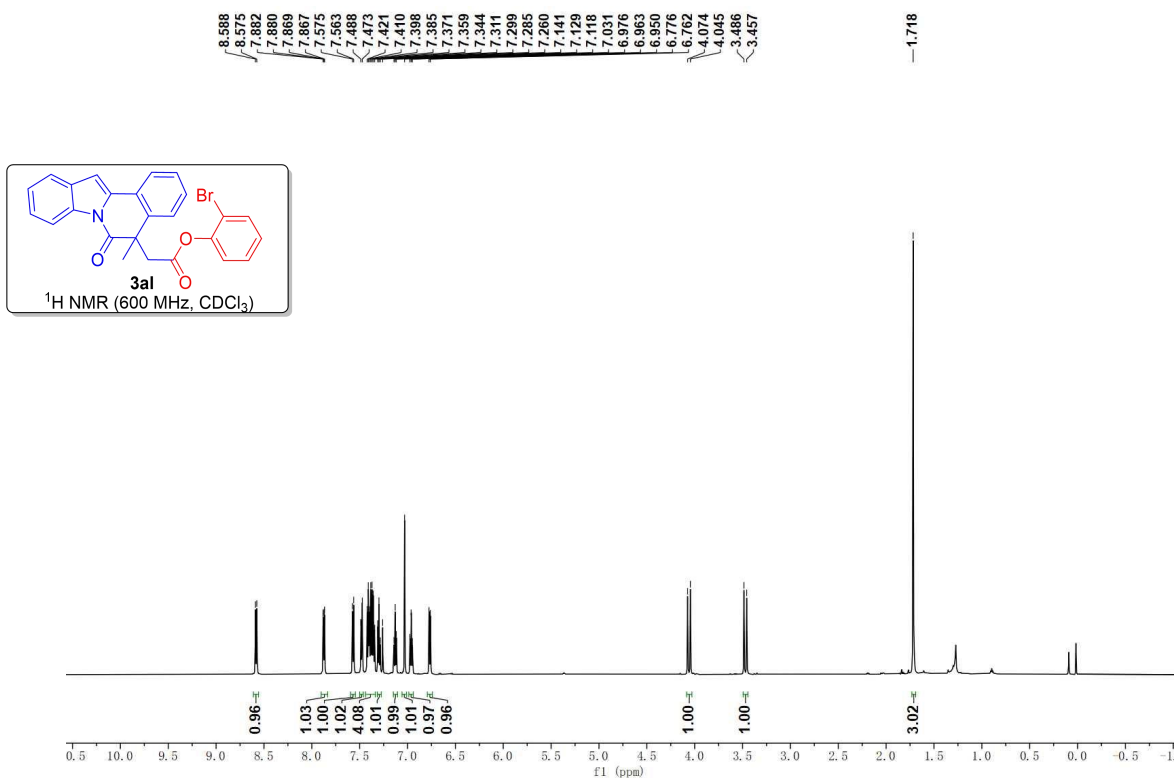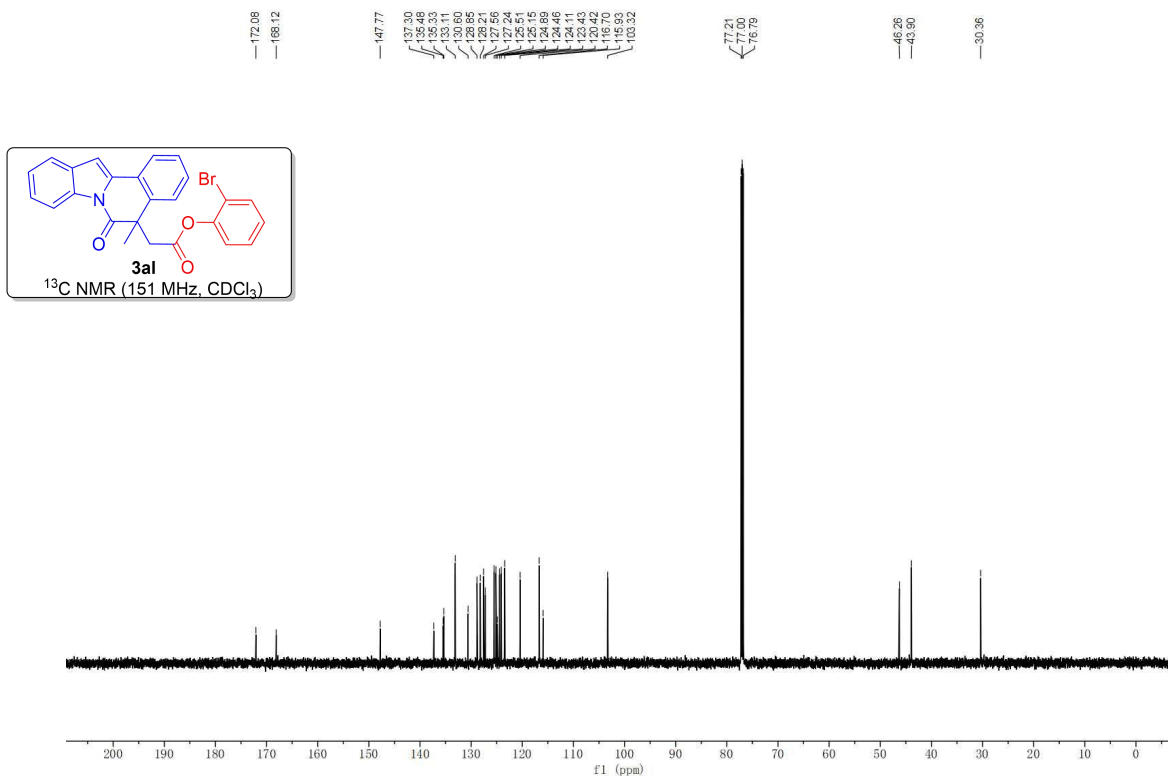



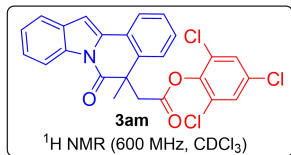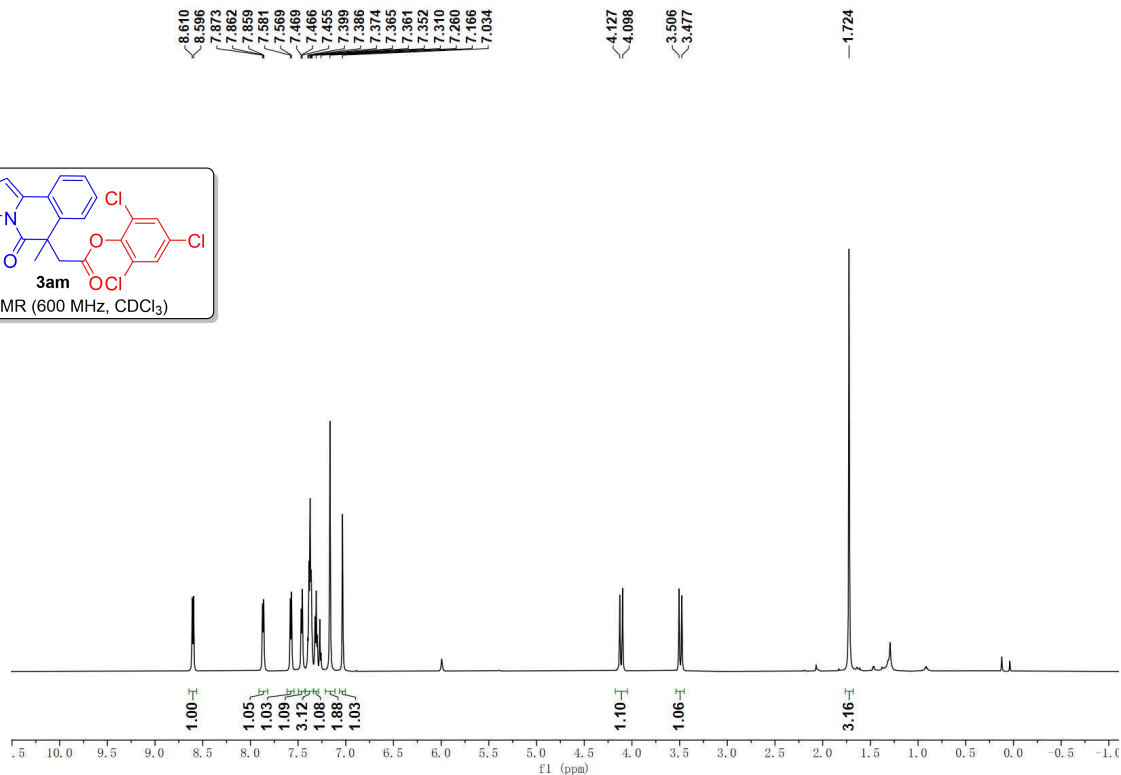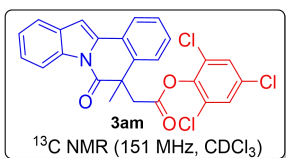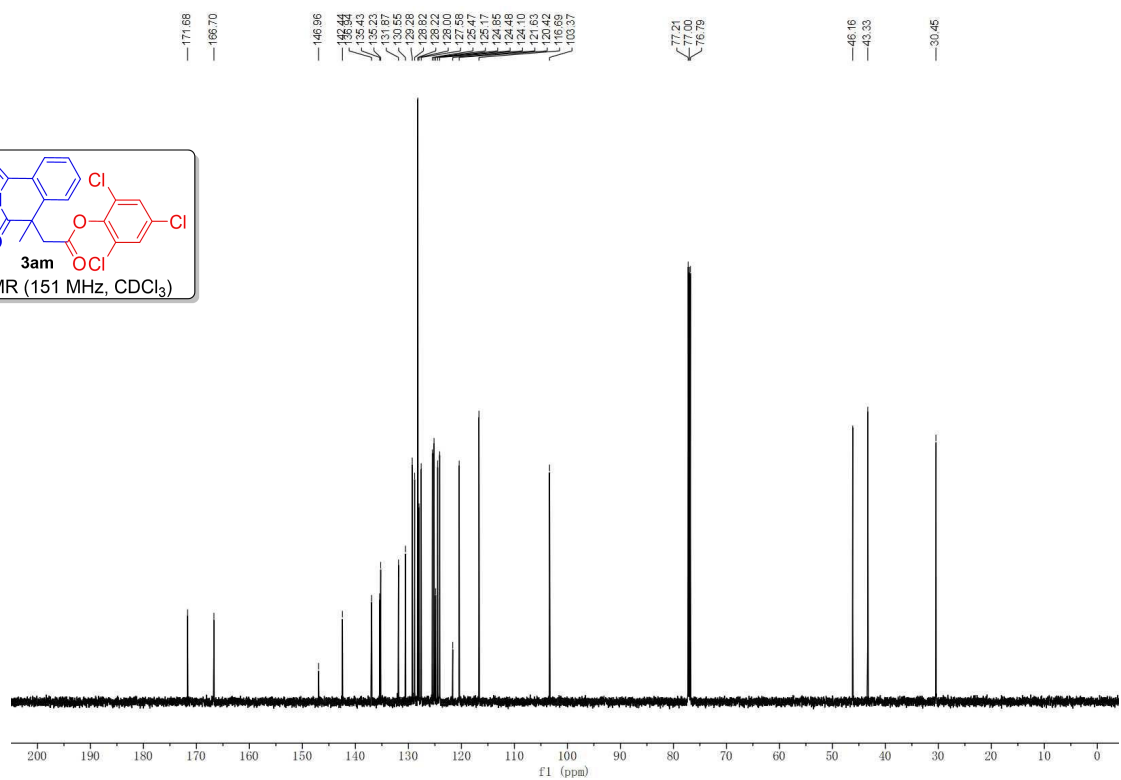

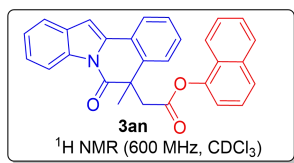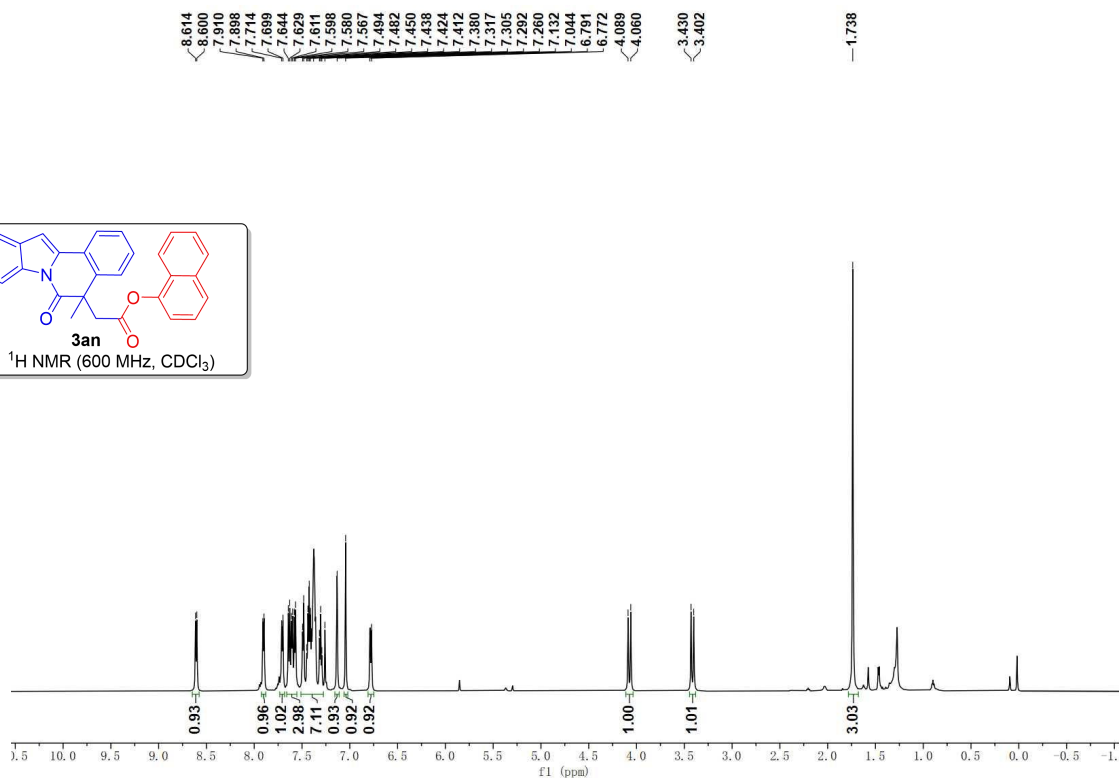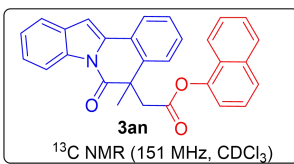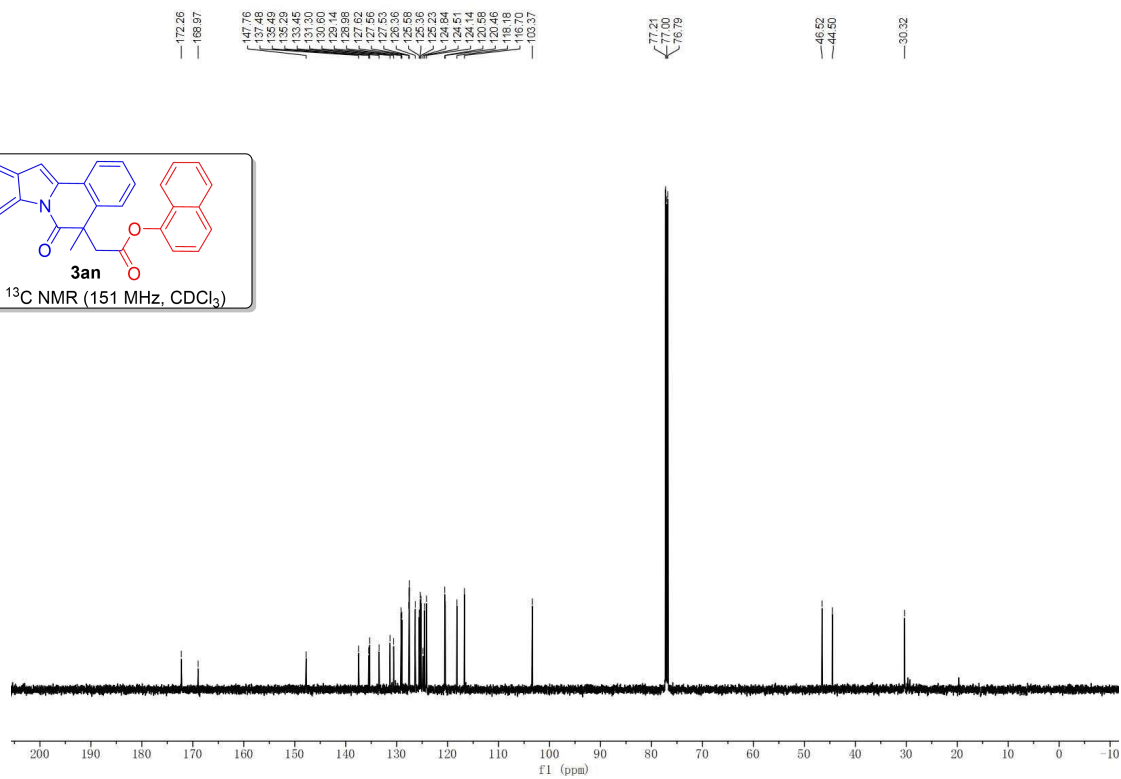

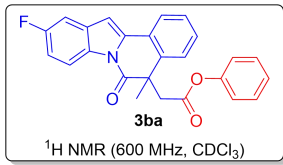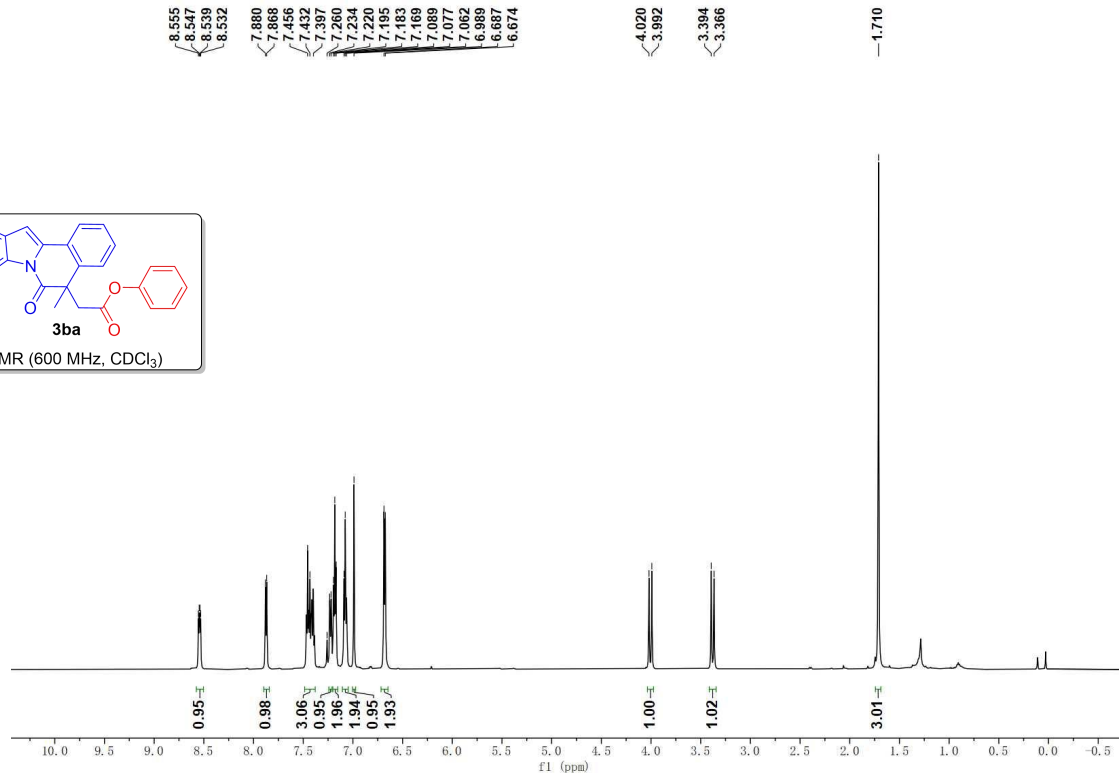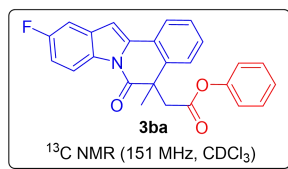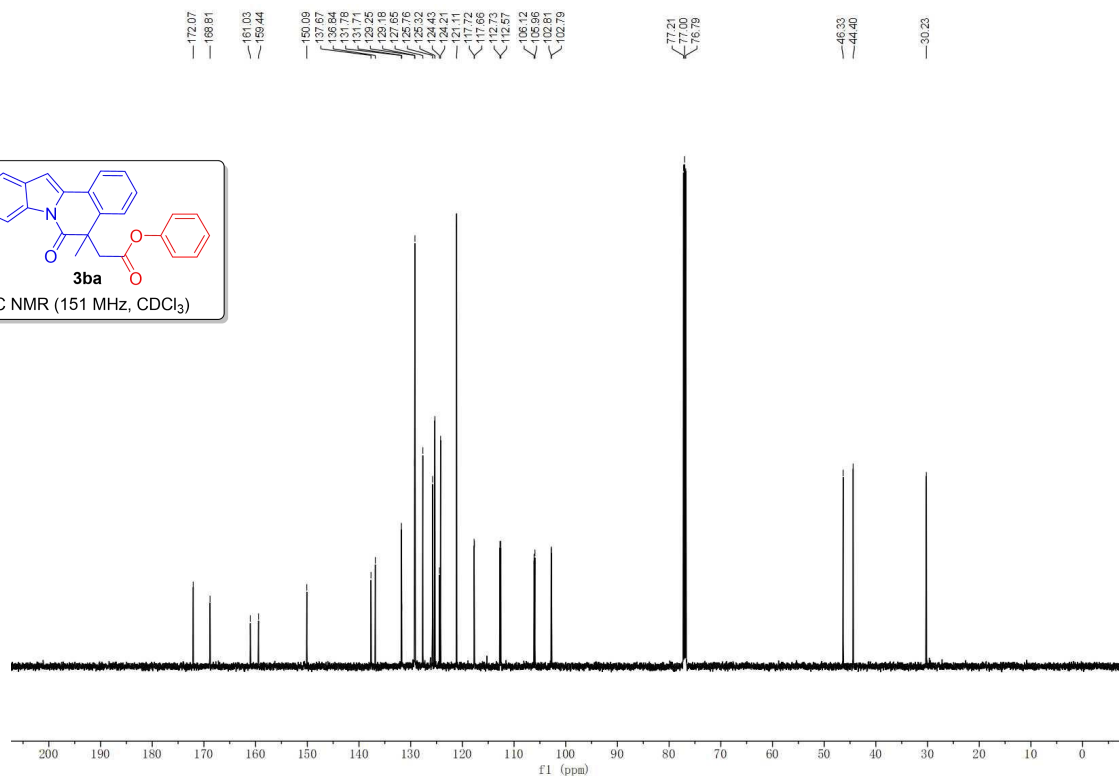

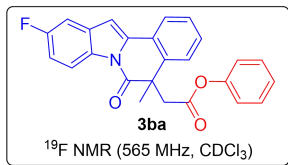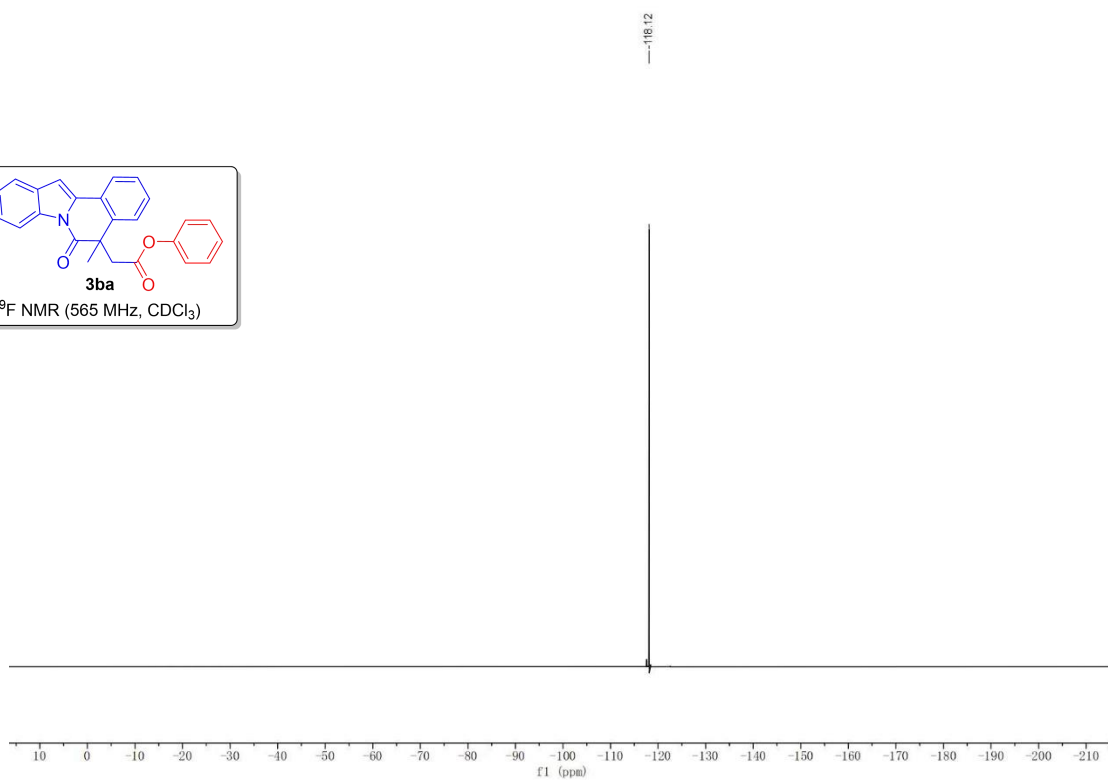

8.496  
 8.482  
 7.878  
 7.865  
 7.534  
 7.530  
 7.459  
 7.446  
 7.431  
 7.417  
 7.411  
 7.399  
 7.387  
 7.310  
 7.306  
 7.295  
 7.292  
 7.260  
 7.184  
 7.172  
 7.158  
 7.081  
 7.069  
 7.056  
 6.958  
 3.999  
 3.971  
 3.378  
 3.350  
 1.704

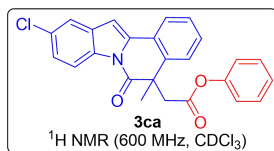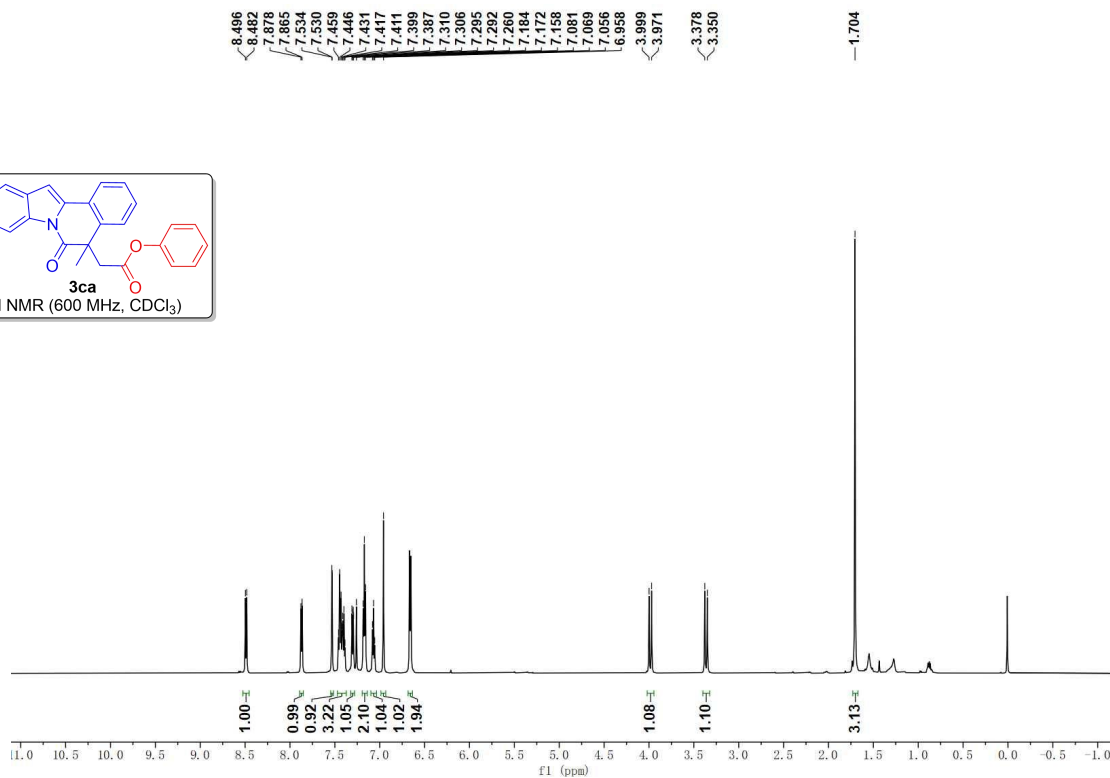

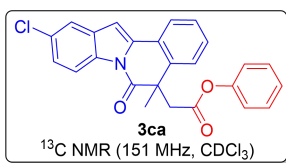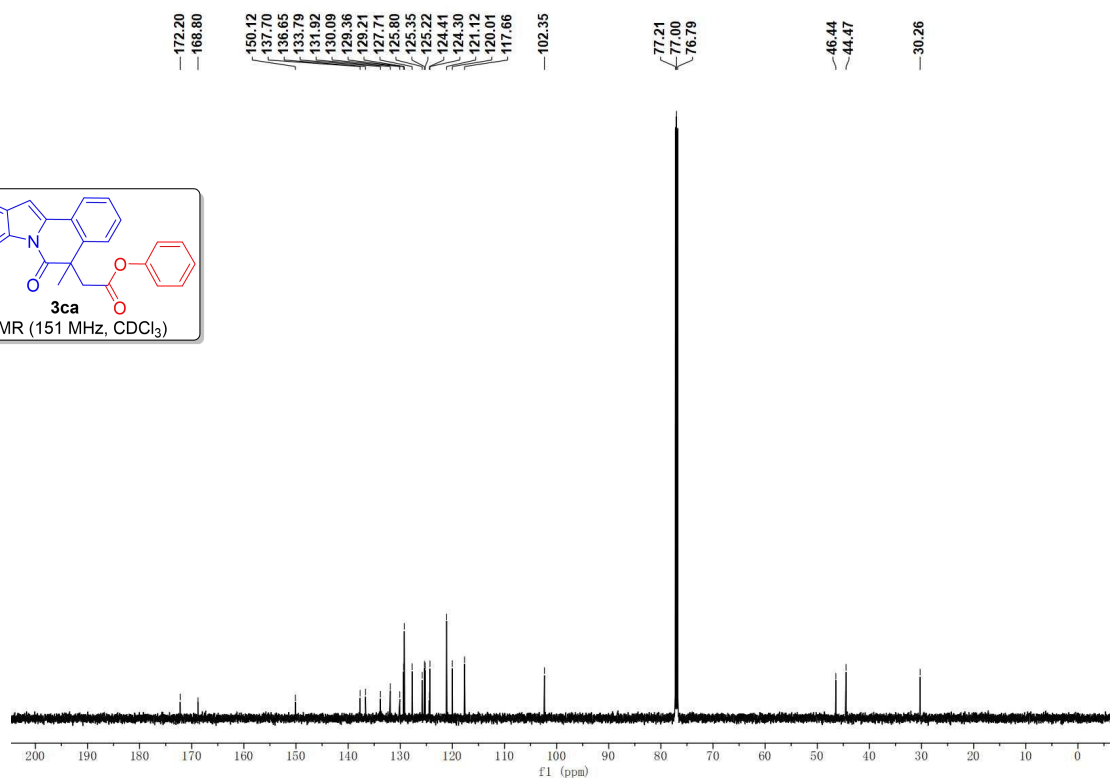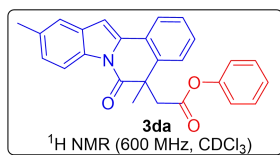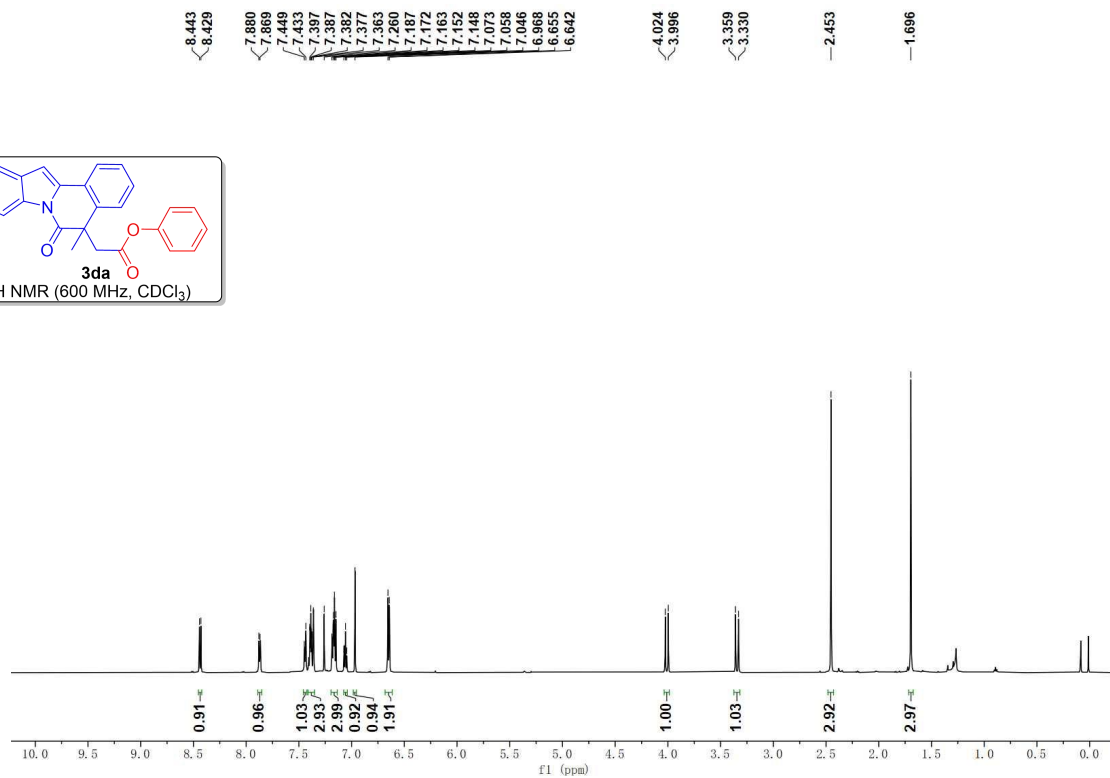

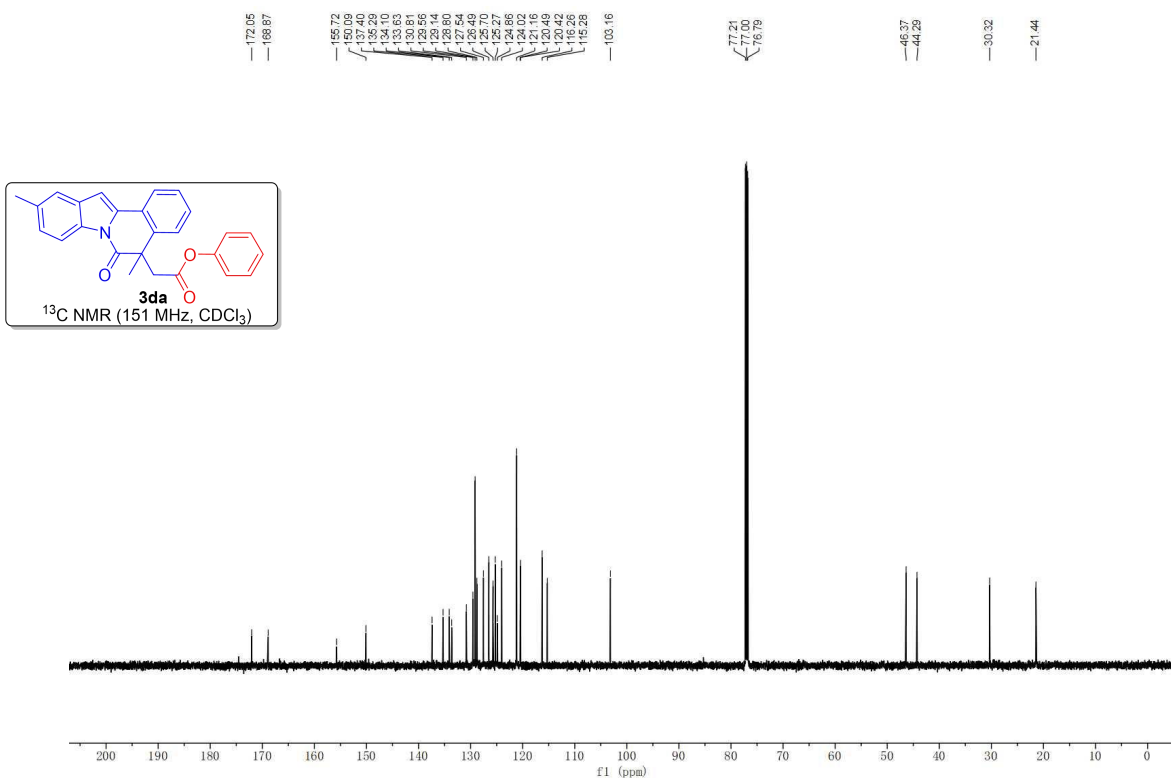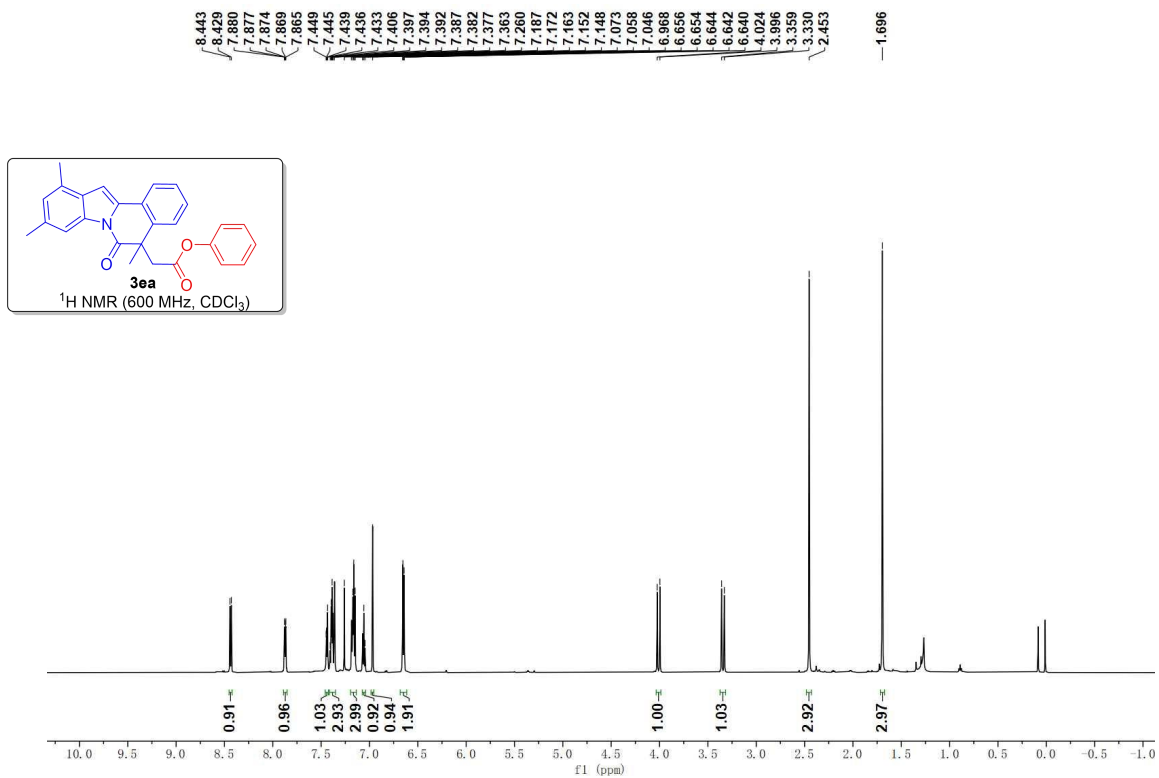

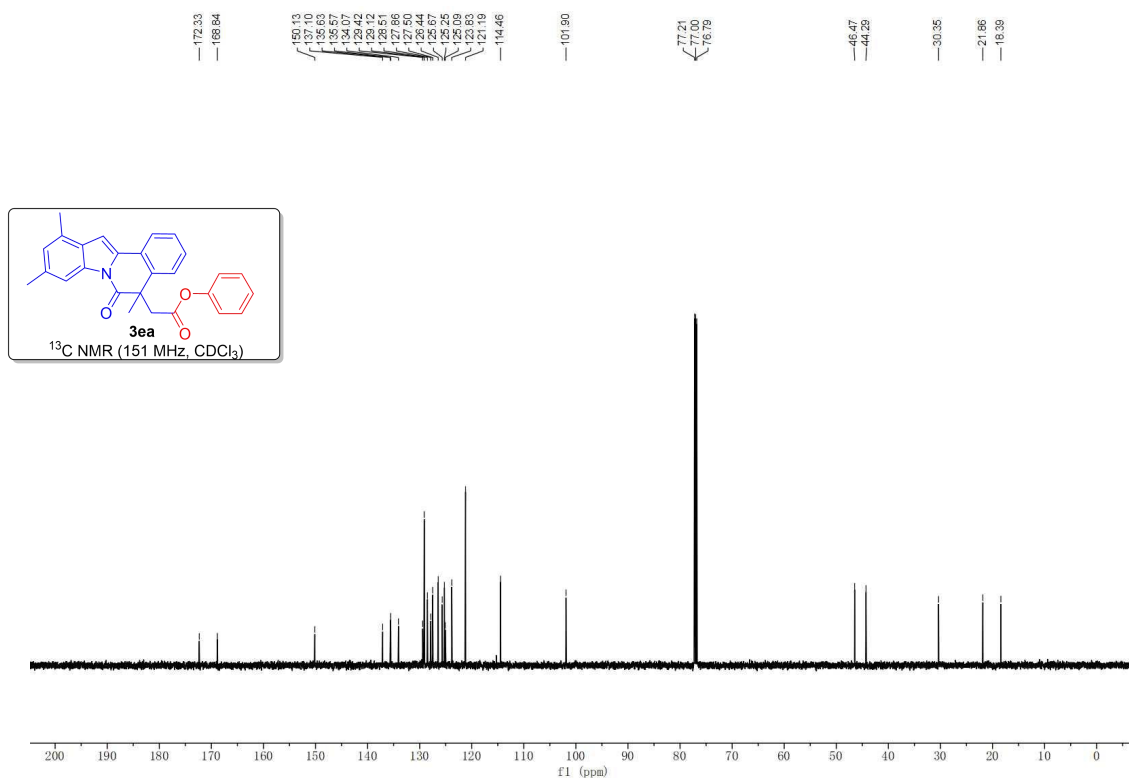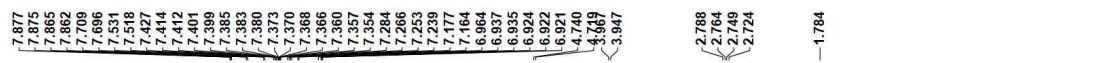

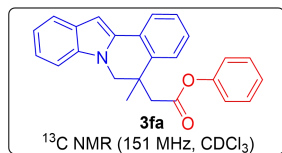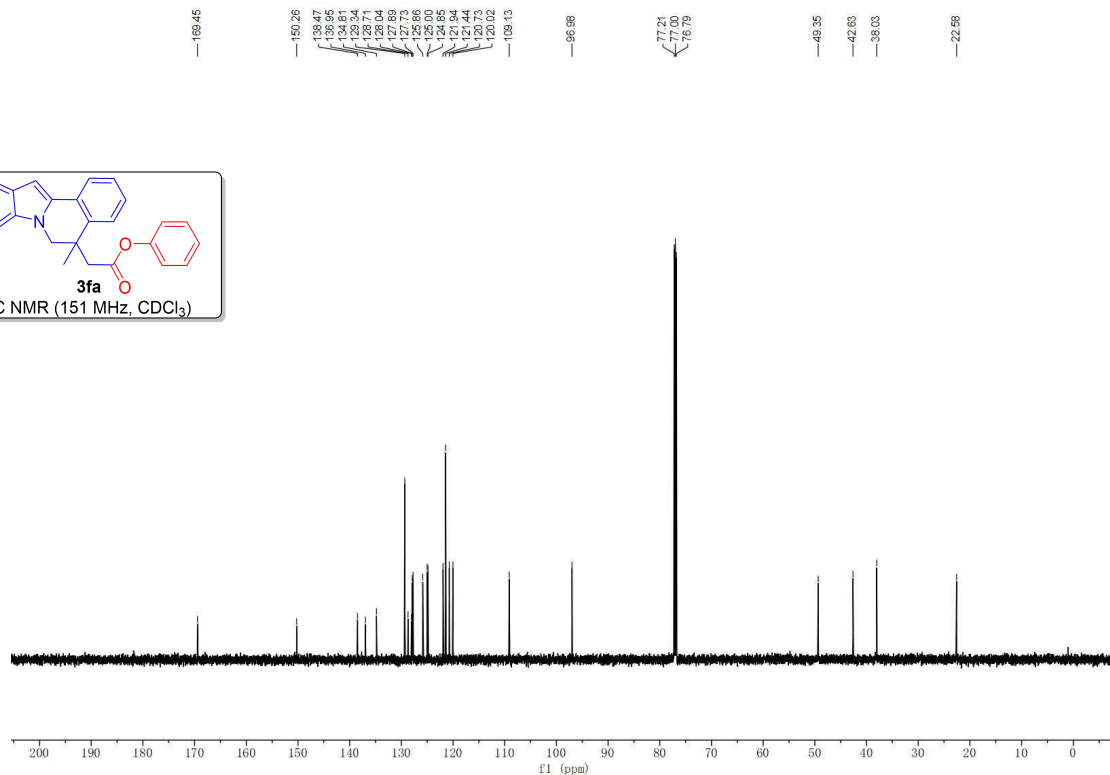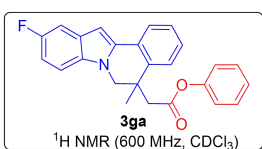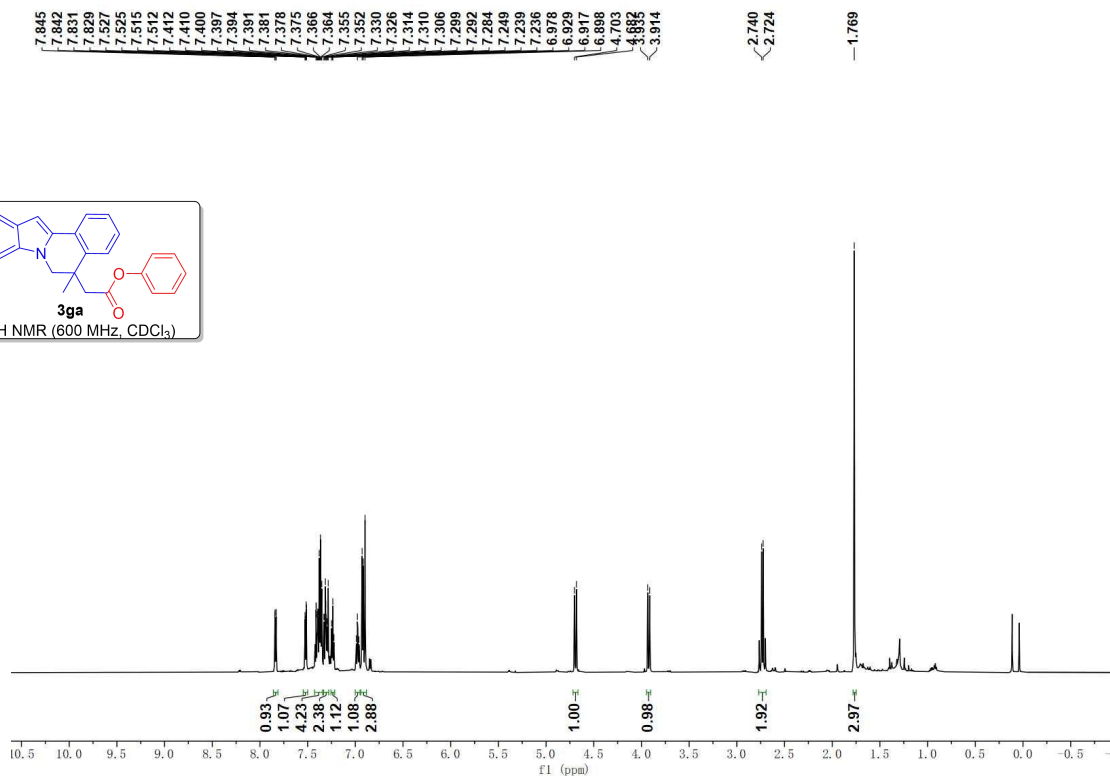



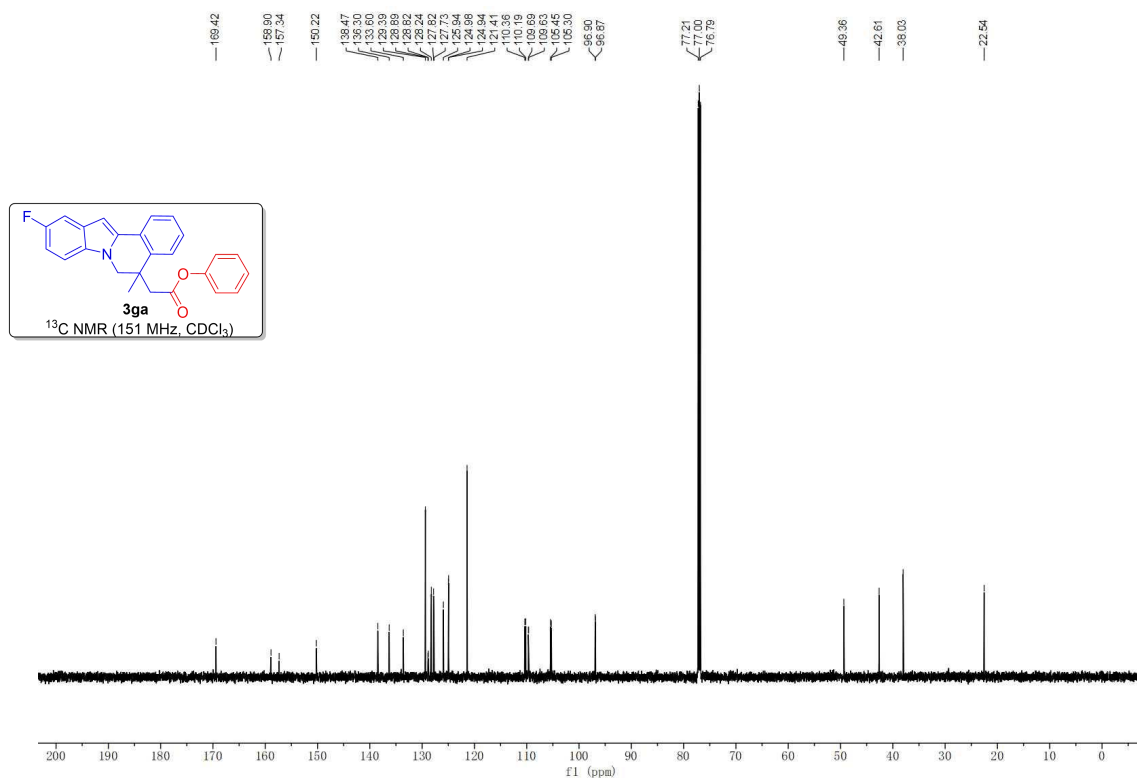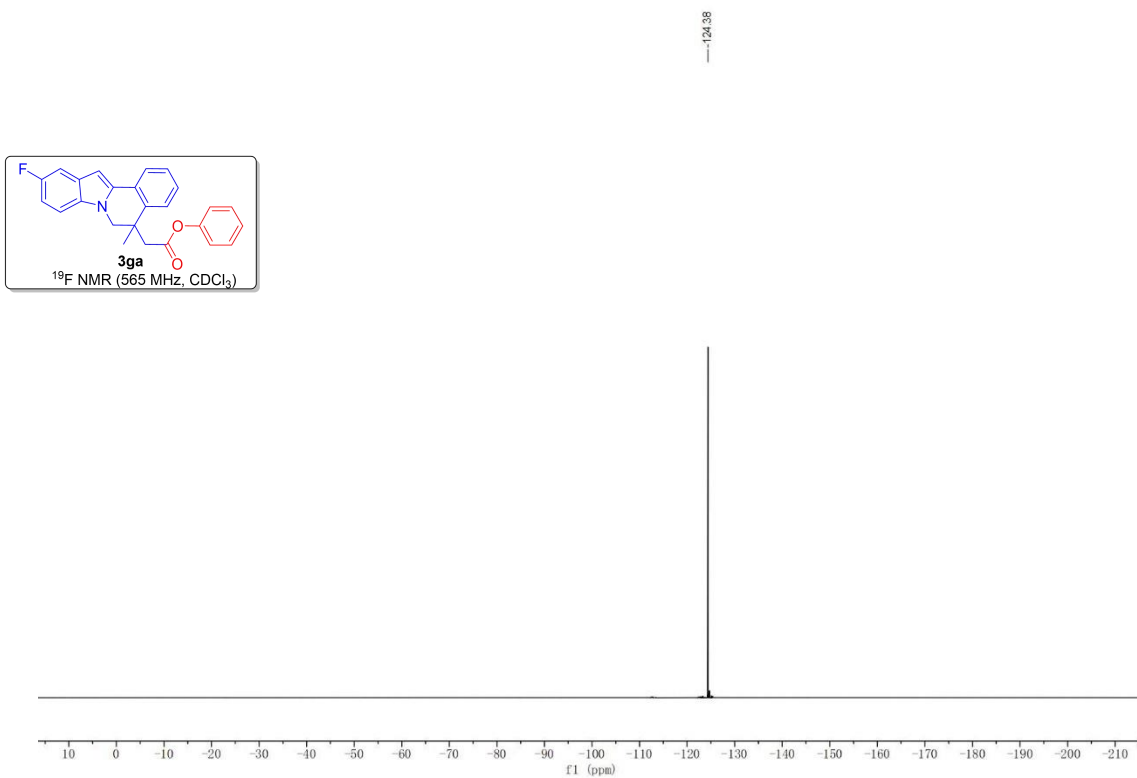

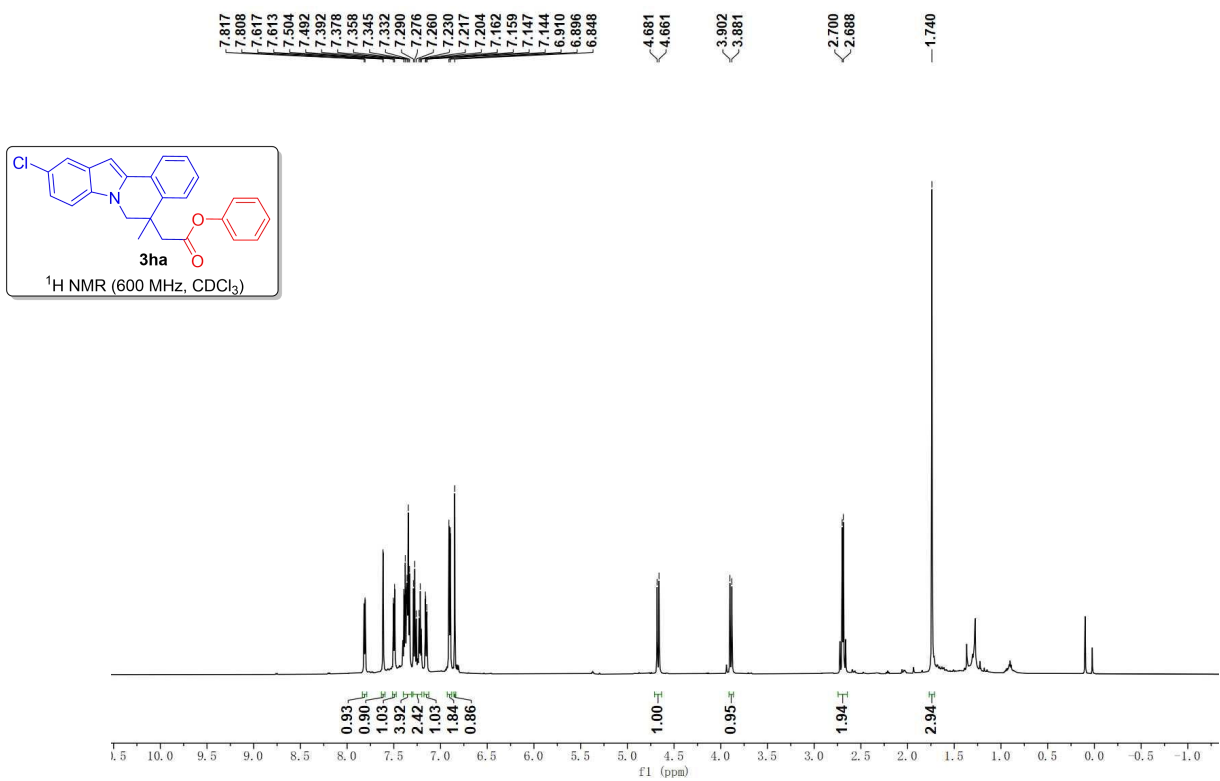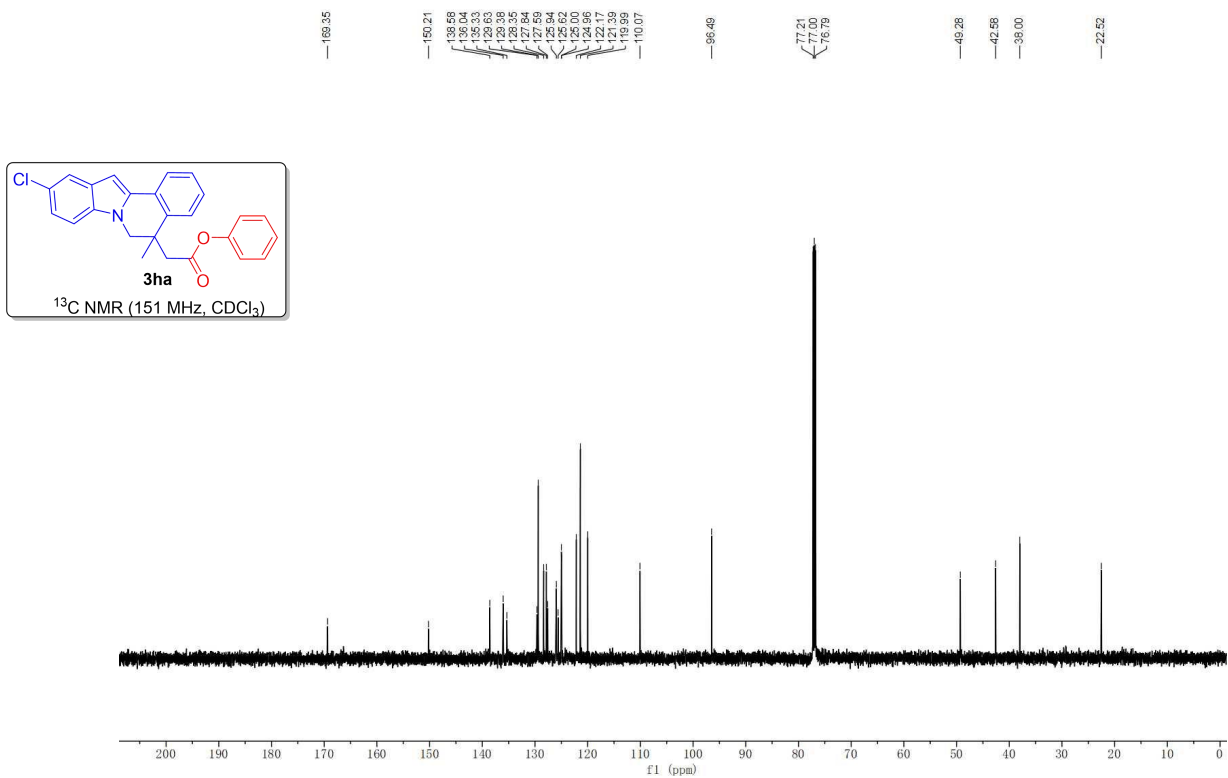

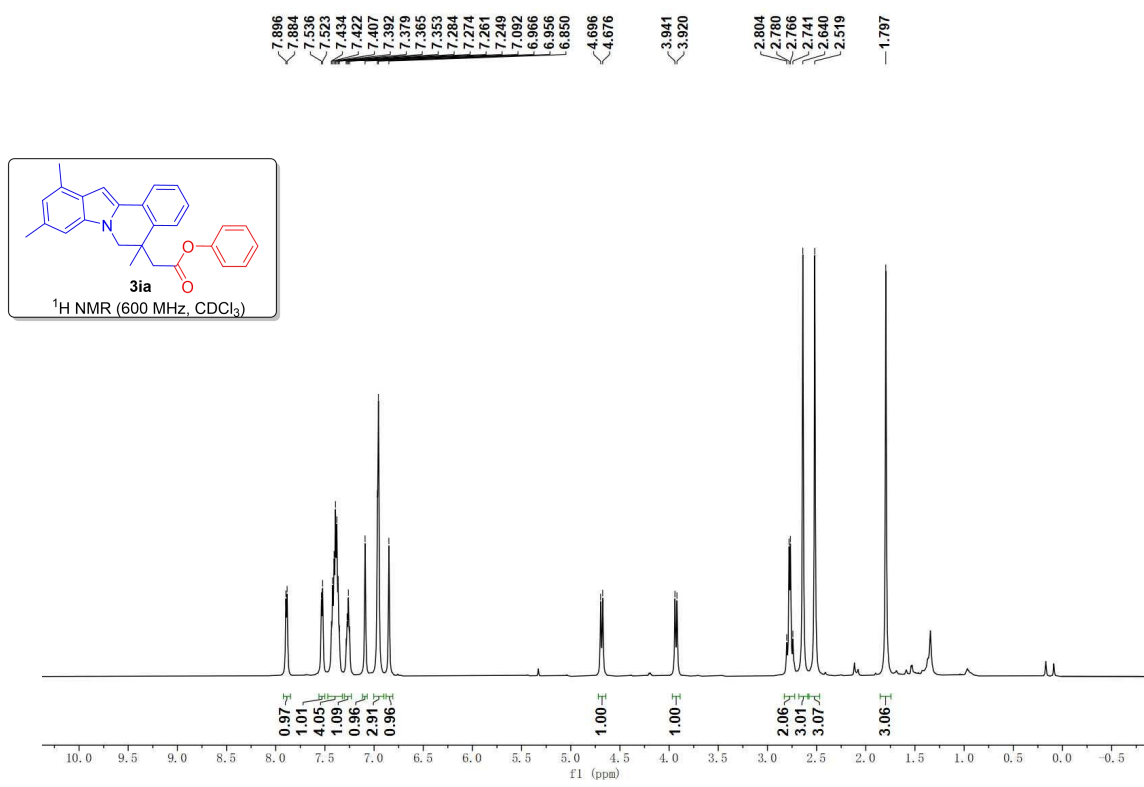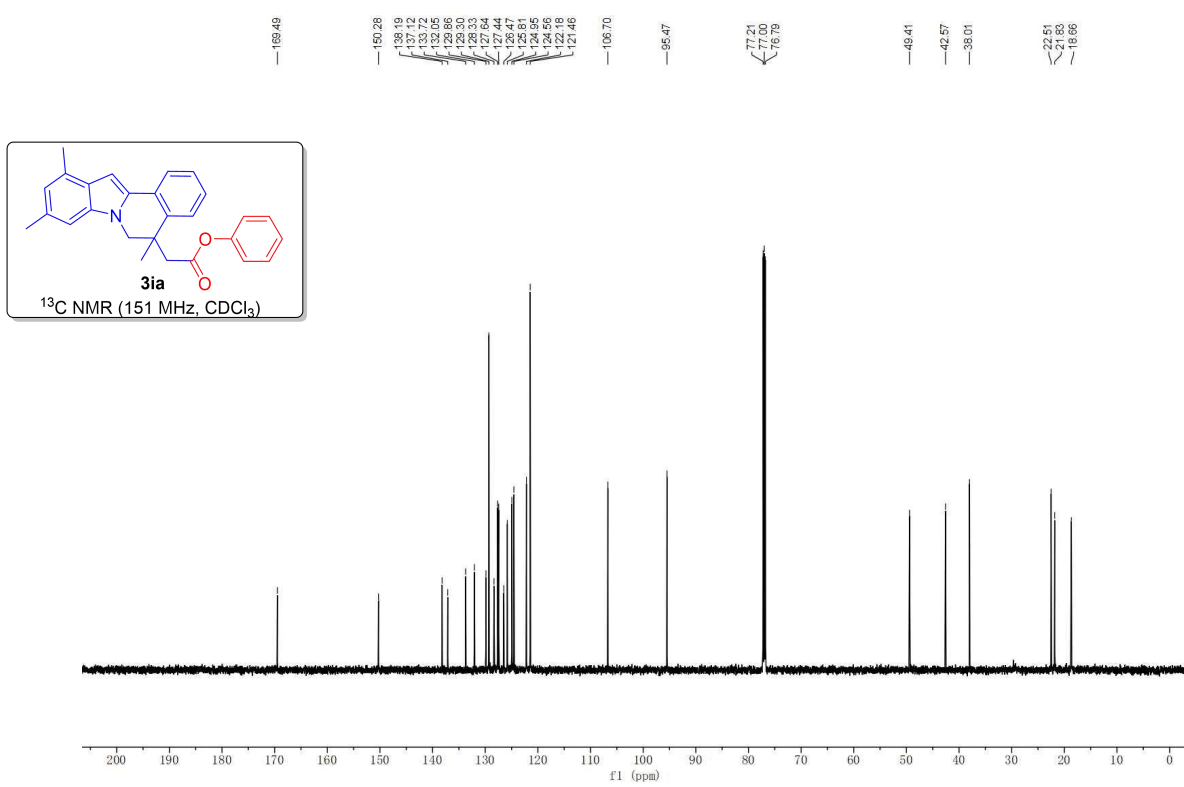

8.602  
8.589  
7.690  
7.680  
7.479  
7.466  
7.453  
7.442  
7.430  
7.417  
7.383  
7.370  
7.354  
7.340  
7.272  
7.260  
7.247  
7.184  
7.172  
7.158  
7.079  
7.067  
7.055  
7.053  
6.944  
6.932  
6.920  
6.833  
6.820  
6.808  
6.700  
6.674  
6.662  
6.579  
6.568  
4.231  
4.202  
3.535  
3.524  
3.507  
3.147  
3.126

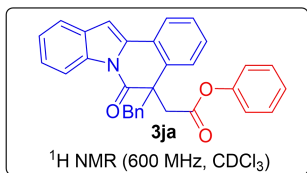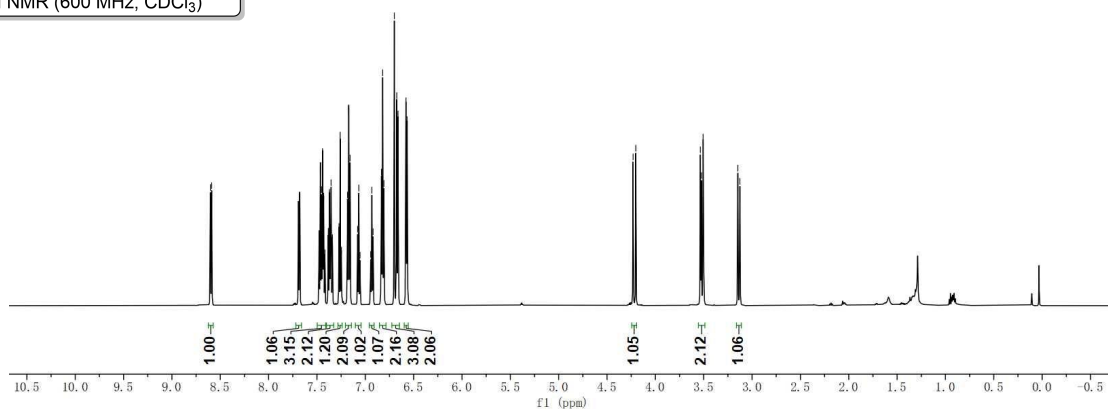

171.13  
168.85  
155.71  
150.10  
135.04  
134.89  
134.72  
134.11  
130.32  
129.56  
129.49  
129.14  
128.62  
127.65  
127.53  
126.71  
126.47  
125.71  
125.62  
125.62  
125.02  
123.73  
123.73  
121.14  
120.49  
119.71  
116.41  
115.28  
103.01  
77.21  
77.00  
76.79  
52.40  
48.76  
43.08

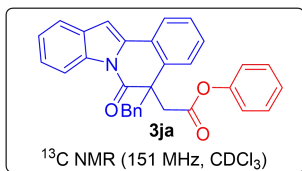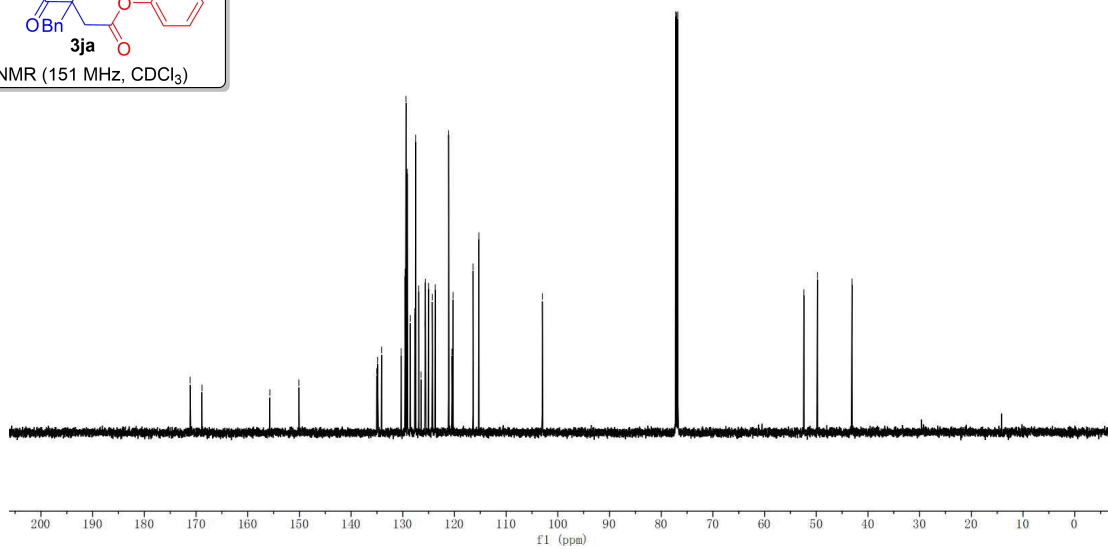

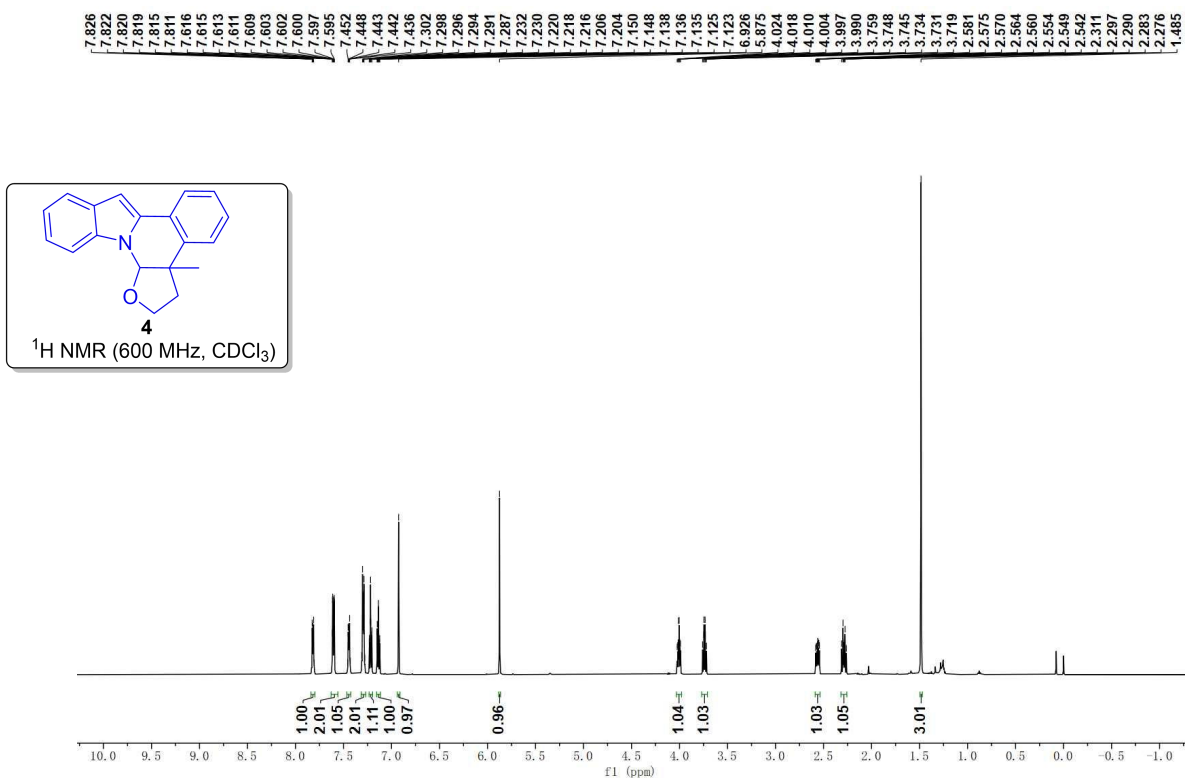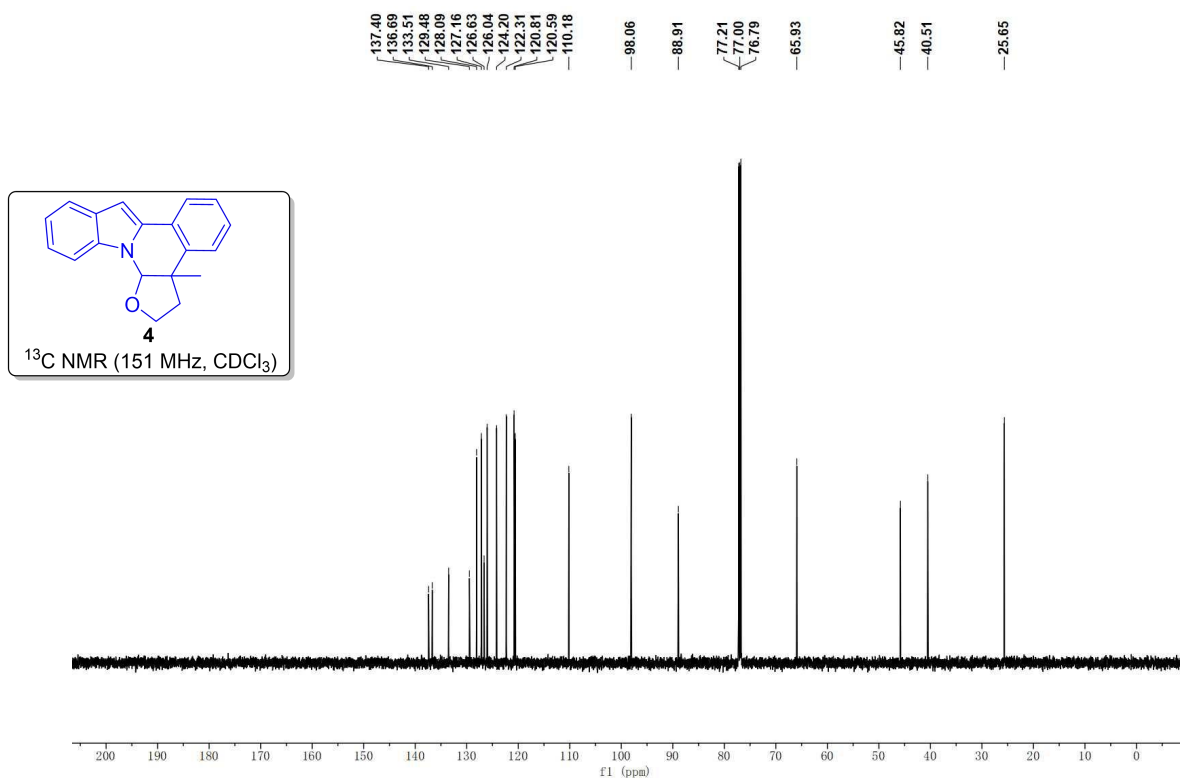

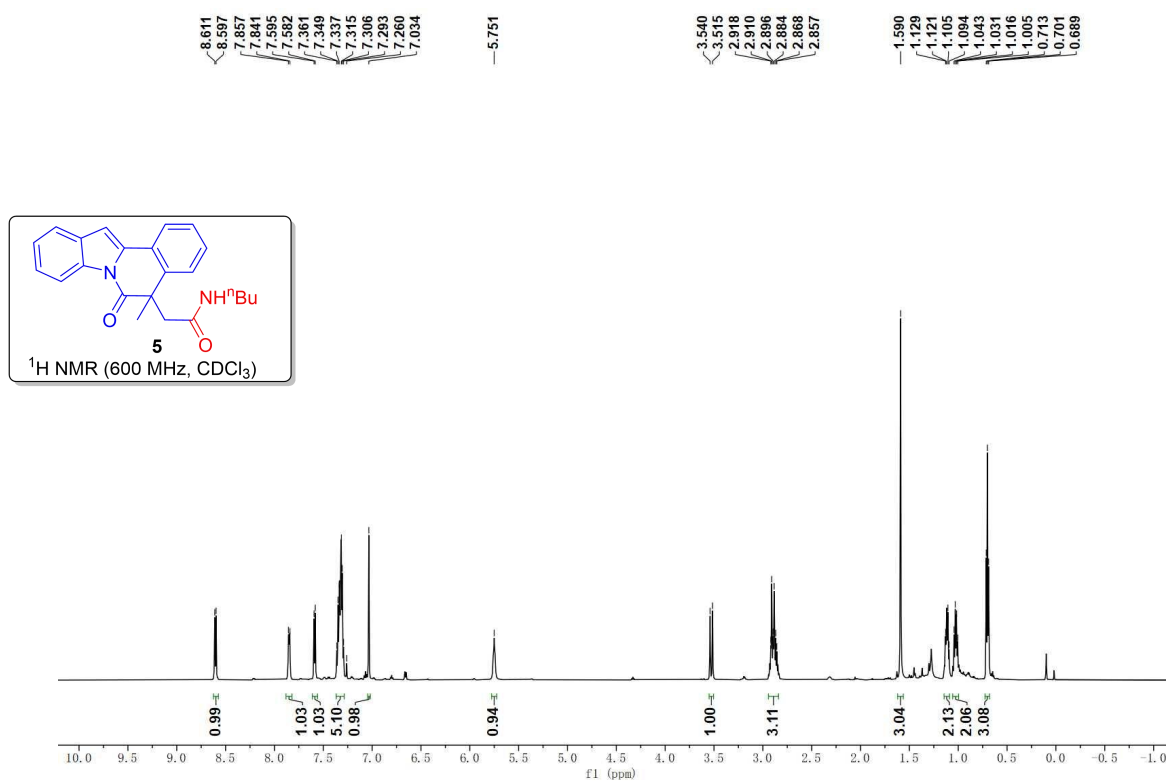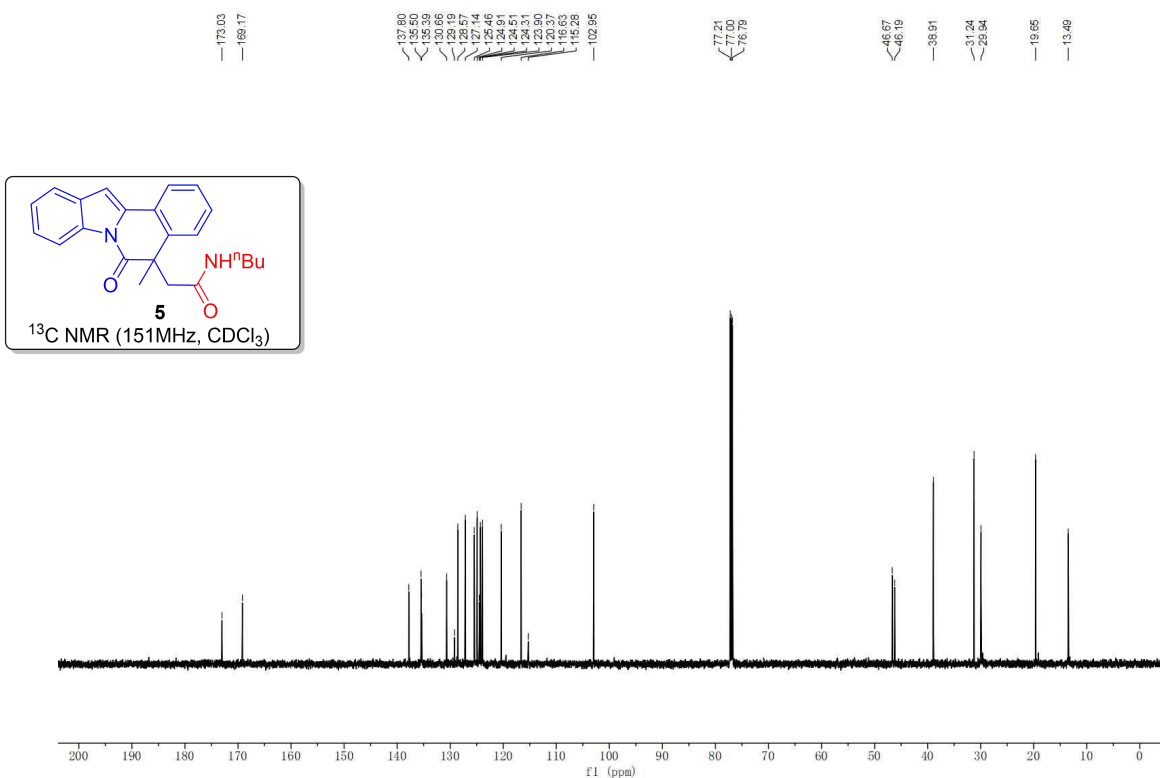

Supplement: d4cc02577f1.pdf [file d4cc02577f1.pdf]
